# Supplementary material for: PrognosiT: Pathway/gene set-based tumour volume prediction using multiple kernel learning
Source: Springer Nature journal article supplement (doi:10.1186/s12859-021-04460-6), 2021-11-02
Supplement: MOESM1 [file 12859_2021_4460_MOESM1_ESM-1.pdf]

PrognosiT: Pathway/gene set-based tumour volume  
prediction using multiple kernel learning  
— Supplementary figures —

Ayyüce Begüm Bektaş<sup>1</sup> and Mehmet Gönen<sup>2,3</sup>

<sup>1</sup>Graduate School of Science and Engineering, Koç University, İstanbul 34450, Turkey

<sup>2</sup>Department of Industrial Engineering, College of Engineering, Koç University, İstanbul 34450, Turkey

<sup>3</sup>School of Medicine, Koç University, İstanbul 34450, Turkey

|                                            |    |                                  |    |
|--------------------------------------------|----|----------------------------------|----|
| HALLMARK_HYPOXIA                           | 99 | PID_CONE_PATHWAY                 | 98 |
| HALLMARK_KRAS_SIGNALING_DN                 | 99 | PID_HIF1_TFPATHWAY               | 98 |
| HALLMARK_SPERMATOGENESIS                   | 96 | PID_NFAT_TFPATHWAY               | 88 |
| HALLMARK_PANCREAS_BETA_CELLS               | 95 | PID_ARF6_PATHWAY                 | 85 |
| HALLMARK_INFLAMMATORY_RESPONSE             | 86 | PID_HNF3A_PATHWAY                | 85 |
| HALLMARK_XENOBIOTIC_METABOLISM             | 85 | PID_FRA_PATHWAY                  | 84 |
| HALLMARK_FATTY_ACID_METABOLISM             | 75 | PID_ERBB_NETWORK_PATHWAY         | 82 |
| HALLMARK_NOTCH_SIGNALING                   | 73 | PID_HNF3B_PATHWAY                | 81 |
| HALLMARK_KRAS_SIGNALING_UP                 | 62 | PID_WNT_SIGNALING_PATHWAY        | 77 |
| HALLMARK_ANGIOGENESIS                      | 54 | PID_RHODOPSIN_PATHWAY            | 77 |
| HALLMARK_P53_PATHWAY                       | 41 | PID_UPA_UPAR_PATHWAY             | 74 |
| HALLMARK_MYOGENESIS                        | 39 | PID_TCR_CALCIIUM_PATHWAY         | 66 |
| HALLMARK_GLYCOLYSIS                        | 37 | PID_FANCONI_PATHWAY              | 63 |
| HALLMARK_BILE_ACID_METABOLISM              | 34 | PID_LIS1_PATHWAY                 | 63 |
| HALLMARK_HEDGEHOG_SIGNALING                | 33 | PID_HES_HEY_PATHWAY              | 60 |
| HALLMARK_EPITHELIAL_MESENCHYMAL_TRANSITION | 33 | PID_IL23_PATHWAY                 | 57 |
| HALLMARK_COAGULATION                       | 32 | PID_ERB_GENOMIC_PATHWAY          | 53 |
| HALLMARK_CHOLESTEROL_HOMEOSTASIS           | 30 | PID_VEGF_VEGFR_PATHWAY           | 49 |
| HALLMARK_G2M_CHECKPOINT                    | 30 | PID_ATR_PATHWAY                  | 46 |
| HALLMARK_E2F_TARGETS                       | 30 | PID_ALPHA_SYNUCLEIN_PATHWAY      | 46 |
| HALLMARK_APICAL_JUNCTION                   | 26 | PID_SYNDECAN_4_PATHWAY           | 44 |
| HALLMARK_APOPTOSIS                         | 23 | PID_FOXM1_PATHWAY                | 43 |
| HALLMARK_ESTROGEN_RESPONSE_LATE            | 22 | PID_BETA_CATENIN_NUC_PATHWAY     | 43 |
| HALLMARK_MYC_TARGETS_V2                    | 19 | PID_EPHB_FWD_PATHWAY             | 39 |
| HALLMARK_TNFA_SIGNALING_VIA_NFKB           | 18 | PID_CMYB_PATHWAY                 | 39 |
| HALLMARK_ADIPOGENESIS                      | 18 | PID_REG_GR_PATHWAY               | 37 |
| HALLMARK_PEROXISOME                        | 18 | PID_PLK1_PATHWAY                 | 37 |
| HALLMARK_WNT_BETA_CATENIN_SIGNALING        | 13 | PID_CD8_TCR_DOWNSTREAM_PATHWAY   | 37 |
| HALLMARK_DNA_REPAIR                        | 12 | PID_TRAIL_PATHWAY                | 34 |
| HALLMARK_COMPLEMENT                        | 12 | PID_CDC42_PATHWAY                | 33 |
| HALLMARK_MYC_TARGETS_V1                    | 12 | PID_LKB1_PATHWAY                 | 32 |
| HALLMARK_INTERFERON_GAMMA_RESPONSE         | 10 | PID_P53_DOWNSTREAM_PATHWAY       | 30 |
| HALLMARK_IL2_STAT5_SIGNALING               | 10 | PID_GLYPICAN_1PATHWAY            | 29 |
| HALLMARK_ANDROGEN_RESPONSE                 | 9  | PID_SYNDECAN_3_PATHWAY           | 28 |
| HALLMARK_HEME_METABOLISM                   | 7  | PID_FGF_PATHWAY                  | 28 |
| HALLMARK_TGF_BETA_SIGNALING                | 6  | PID_SYNDECAN_1_PATHWAY           | 26 |
| HALLMARK_INTERFERON_ALPHA_RESPONSE         | 6  | PID_IL3_PATHWAY                  | 25 |
| HALLMARK_REACTIVE_OXIGEN_SPECIES_PATHWAY   | 6  | PID_NEPHRIN_NEPH1_PATHWAY        | 24 |
| HALLMARK_ESTROGEN_RESPONSE_EARLY           | 5  | PID_DELTA_NP63_PATHWAY           | 24 |
| HALLMARK_APICAL_SURFACE                    | 3  | PID_RAS_PATHWAY                  | 24 |
| HALLMARK_UV_RESPONSE_UP                    | 3  | PID_AP1_PATHWAY                  | 22 |
| HALLMARK_IL6_JAK_STAT3_SIGNALING           | 2  | PID_MYC_REPRESS_PATHWAY          | 22 |
| HALLMARK_PI3K_AKT_MTOR_SIGNALING           | 2  | PID_REELIN_PATHWAY               | 21 |
| HALLMARK_UV_RESPONSE_DN                    | 2  | PID_PRL_SIGNALING_EVENTS_PATHWAY | 20 |
| HALLMARK_MITOTIC_SPINDLE                   | 0  | PID_AURORA_B_PATHWAY             | 20 |
| HALLMARK_PROTEIN_SECRETION                 | 0  | PID_ARF_3PATHWAY                 | 20 |
| HALLMARK_UNFOLDED_PROTEIN_RESPONSE         | 0  | PID_INSULIN_GLUCCOSE_PATHWAY     | 20 |
| HALLMARK_MTORC1_SIGNALING                  | 0  | PID_PS1_PATHWAY                  | 19 |
| HALLMARK_OXIDATIVE_PHOSPHORYLATION         | 0  | PID_P38_MK2_PATHWAY              | 17 |
| HALLMARK_ALLOGRAFT_REJECTION               | 0  | PID_AVB3_OPN_PATHWAY             | 16 |

Figure S1: The selection frequencies of gene sets in the Hallmark collection over 100 replications resulted from PrognosiT algorithm and the selection frequencies of top 50 pathways in the PID collection over 100 replications resulted from PrognosiT algorithm.

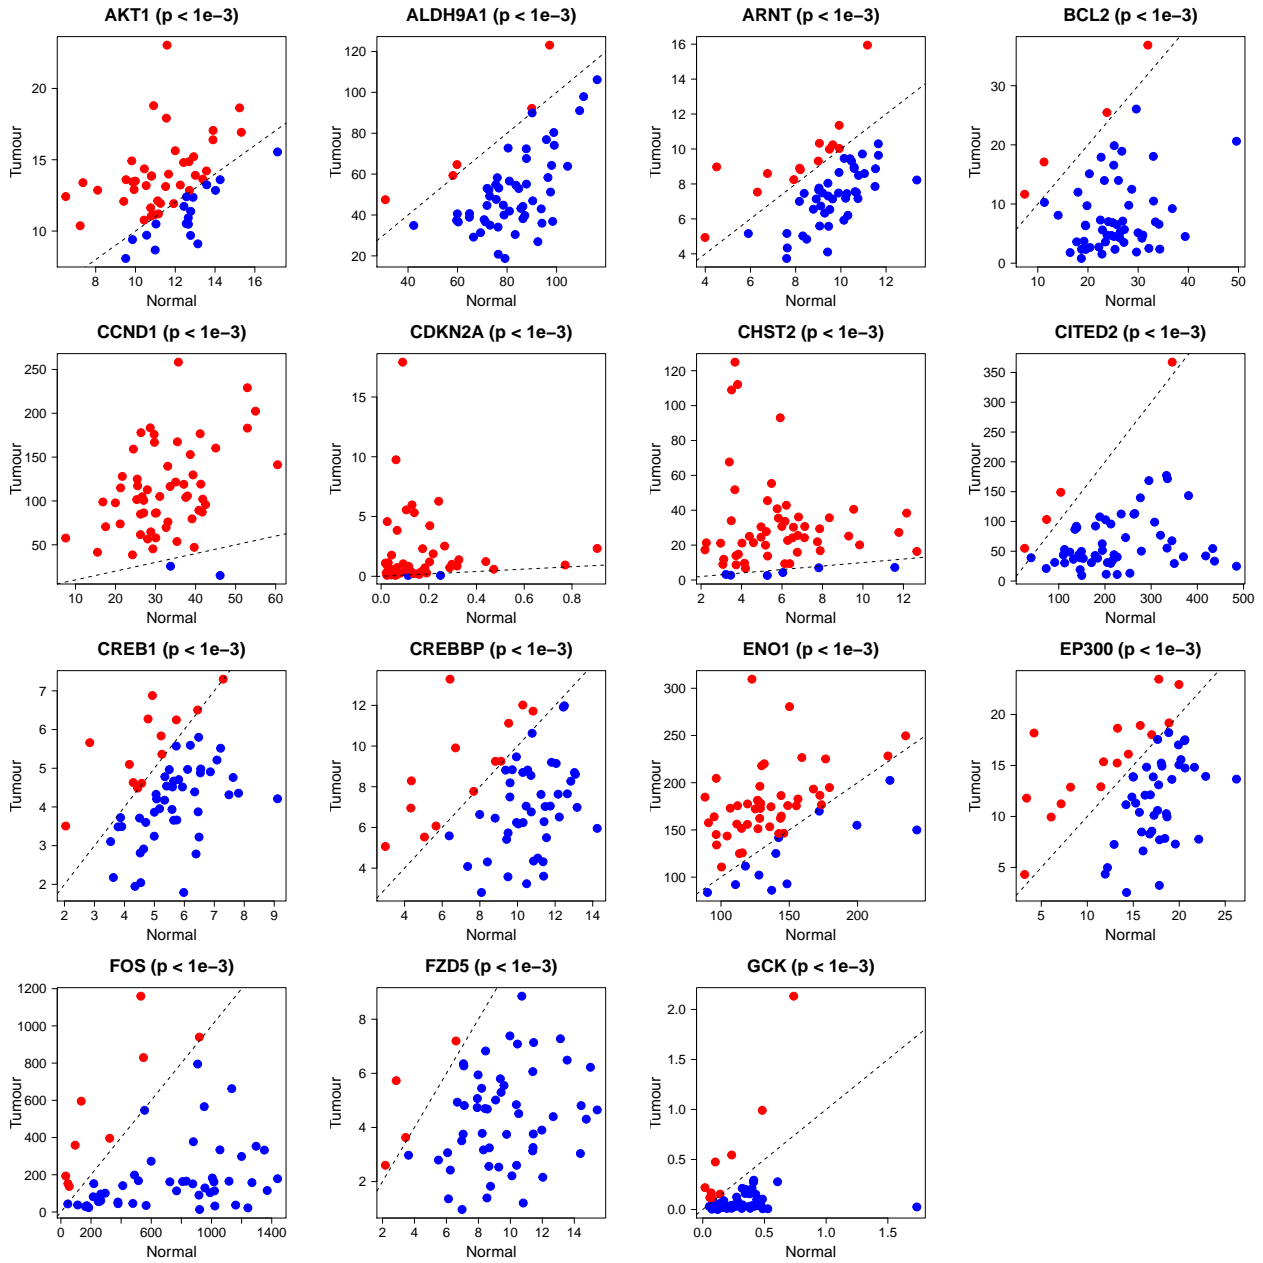

Figure S2: Statistically significantly up- or down-regulated genes during tumor progression selected by PrognosiT algorithm on thyroid carcinoma (i.e., THCA) data set over 100 replications. We performed paired Wilcoxon test to determine whether there is a significant difference (i.e.,  $p$ -value  $< 0.05$ ) between the gene expressions coming from tumor and normal tissues.

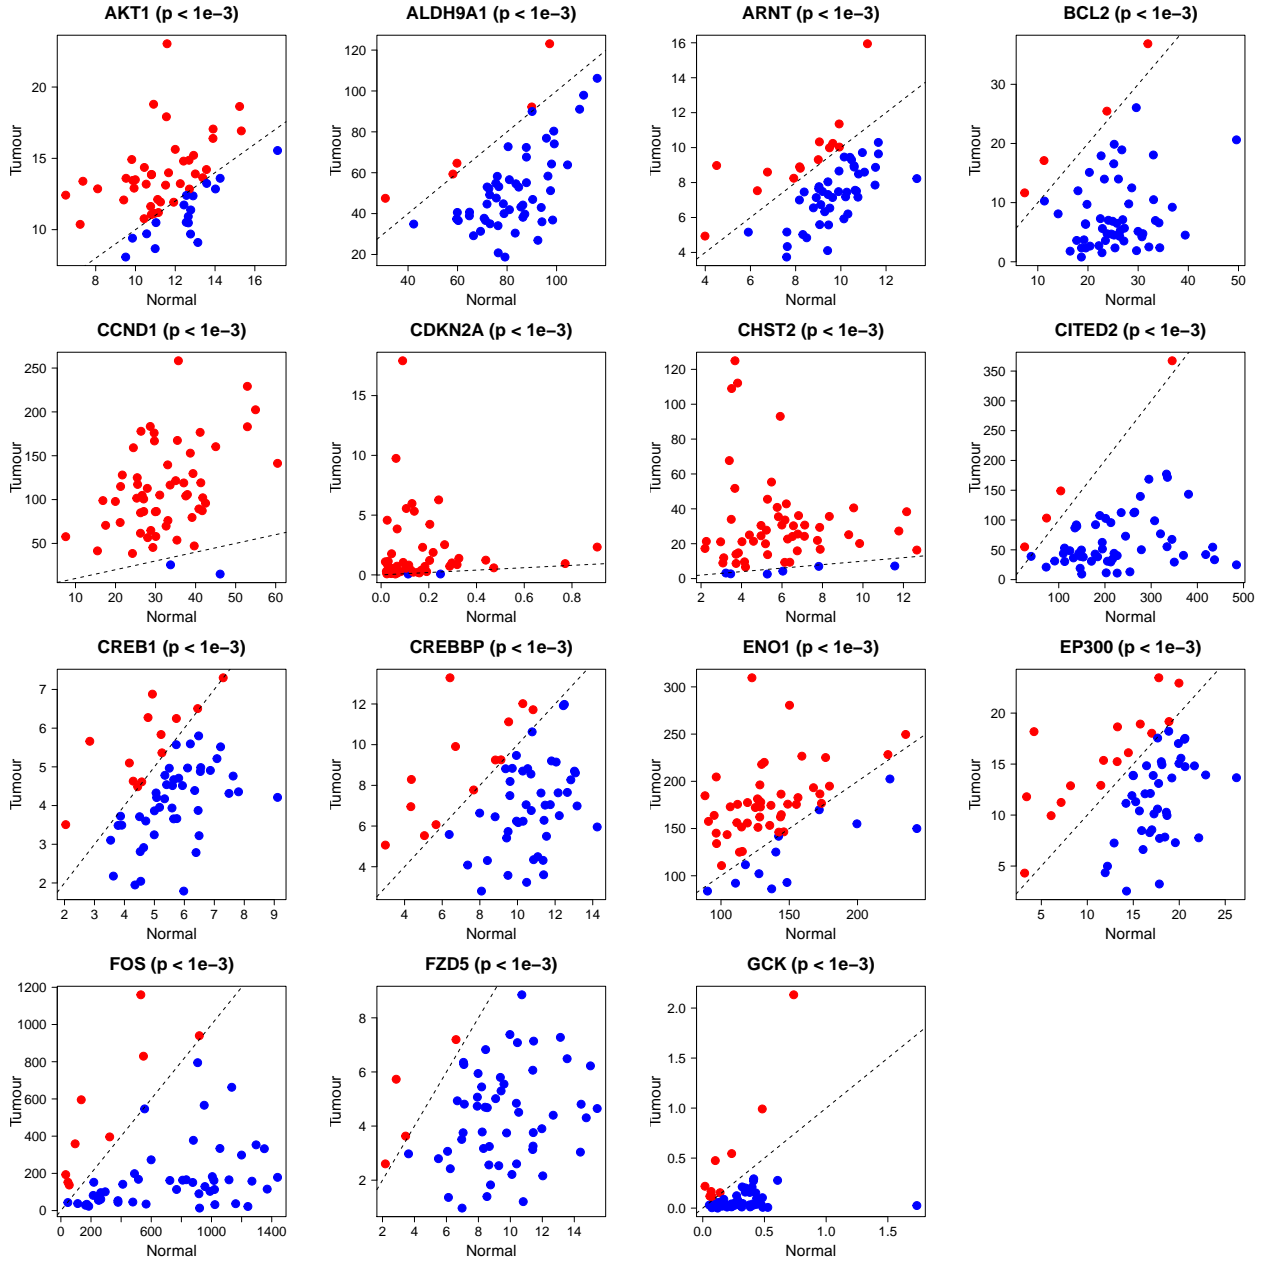

Figure S3: Statistically significantly up- or down-regulated genes during tumor progression selected by PrognosiT algorithm on thyroid carcinoma (i.e., THCA) data set over 100 replications. We performed paired Wilcoxon test to determine whether there is a significant difference (i.e.,  $p$ -value  $< 0.05$ ) between the gene expressions coming from tumor and normal tissues.
