# Supplementary material for: PrognosiT: Pathway/gene set-based tumour volume prediction using multiple kernel learning
Source: BMC Bioinformatics. 2021 Nov 2;22:537. doi: 10.1186/s12859-021-04460-6 (PMC8561914; doi:10.1186/s12859-021-04460-6)
Supplement: Supplementary file 2 — Additional file 2. Supplementary tables. [file 12859_2021_4460_MOESM2_ESM.xlsx]

## Sheet: Supplementary Table 1
Supplementary Table 1: The NRMSE values of RF algorithm (RF), SVR algorithm (SVR), and PrognosiT algorithm with the Hallmark gene set collection (MKL[H]) and PrognosiT algorithm with the Pathway Interaction Database pathway collection (MKL[P]) obtained in each replication on thyroid carcinoma (i.e. THCA) dataset.
Cohort	Replication	RF	SVR	MKL[H]	MKL[P]
THCA	1	0.979792	1.11896	1.02084	1.00914
THCA	2	0.956082	0.940051	0.998709	0.930778
THCA	3	0.966109	0.926117	0.953337	0.939886
THCA	4	1.00739	0.995806	1.01058	0.98847
THCA	5	0.946673	0.972821	0.912216	0.931259
THCA	6	0.974976	0.954174	0.96795	0.944616
THCA	7	0.959145	0.93827	0.908217	0.84479
THCA	8	0.988955	0.952592	0.909883	0.971928
THCA	9	0.99177	1.01513	1.04671	1.01702
THCA	10	0.984898	0.973148	0.984546	0.995572
THCA	11	1.00938	0.979489	0.981684	0.975452
THCA	12	0.949682	0.97043	0.951757	0.962539
THCA	13	0.954262	0.930461	0.943511	0.869679
THCA	14	0.978872	0.994153	0.945882	0.986488
THCA	15	0.995155	0.966035	0.952719	0.887155
THCA	16	1.04423	1.06854	1.09915	1.05875
THCA	17	0.940376	0.911734	0.918128	0.889085
THCA	18	0.99184	0.984151	0.973415	0.964506
THCA	19	1.00007	0.961863	0.957654	0.939309
THCA	20	1.09274	1.14239	1.11126	1.12646
THCA	21	0.985934	0.94729	0.929401	0.905019
THCA	22	0.95276	0.850797	0.786509	0.88276
THCA	23	0.944639	0.887687	0.91249	0.922581
THCA	24	0.99673	0.957514	0.943743	1.00067
THCA	25	0.969582	0.984242	0.88816	0.848207
THCA	26	0.950005	0.891142	0.915097	0.908746
THCA	27	1.0112	0.981035	0.97889	0.988851
THCA	28	0.98912	0.919526	0.938656	0.899261
THCA	29	0.978985	0.99243	1.00305	0.949585
THCA	30	0.904173	0.901529	0.872252	0.892101
THCA	31	0.857676	0.917736	0.858571	0.900904
THCA	32	0.950286	0.94141	0.94682	0.919351
THCA	33	0.983942	0.95252	0.913418	0.895748
THCA	34	1.00556	0.991425	0.989035	0.996922
THCA	35	1.01482	1.05016	1.02905	1.12475
THCA	36	0.963452	0.984588	0.973219	0.970795
THCA	37	0.990471	0.929003	0.956378	0.933902
THCA	38	0.919911	0.953925	0.923471	0.867758
THCA	39	1.0148	0.971845	1.05049	1.00891
THCA	40	0.988056	1.00551	0.981296	0.956481
THCA	41	0.865791	0.79514	0.665034	0.794873
THCA	42	0.93031	0.989613	0.940664	0.949958
THCA	43	0.947009	0.933866	0.913328	0.750836
THCA	44	0.996437	0.986705	0.984956	0.947036
THCA	45	0.961926	0.923866	0.9047	0.901777
THCA	46	0.992993	0.926214	0.91517	0.914388
THCA	47	0.925413	0.919504	0.859886	0.890839
THCA	48	1.00908	1.01633	0.966172	1.01452
THCA	49	1.00984	0.97536	0.983914	0.99587
THCA	50	0.965908	0.940719	0.933496	0.878064
THCA	51	1.02248	1.20183	1.27931	1.2359
THCA	52	0.92694	0.934543	0.926663	0.990168
THCA	53	0.92147	0.894109	0.878992	0.861499
THCA	54	0.890846	0.886084	0.832714	0.86353
THCA	55	1.00344	1.03979	1.01342	1.02331
THCA	56	1.01203	0.999647	1.00548	0.974192
THCA	57	0.941413	1.02767	0.918811	0.959327
THCA	58	0.951167	0.880658	0.895829	0.915767
THCA	59	0.856168	0.965959	0.974154	0.953172
THCA	60	0.989924	0.996954	0.927594	0.995586
THCA	61	0.925121	0.886286	0.883127	0.901455
THCA	62	0.946689	0.908432	0.897376	0.915372
THCA	63	1.00263	0.935051	0.9164	0.822945
THCA	64	0.984896	0.909482	0.876622	0.941095
THCA	65	0.964086	0.910591	0.915776	0.893281
THCA	66	0.900967	0.942308	0.833251	0.938533
THCA	67	0.944885	0.942997	0.933962	0.912873
THCA	68	1.00759	0.973826	0.967706	0.987246
THCA	69	0.998728	0.965919	0.951425	0.966393
THCA	70	0.973477	1.03576	0.98158	1.1053
THCA	71	0.891461	0.976526	0.892199	0.839857
THCA	72	0.948905	0.90914	0.929317	0.924061
THCA	73	0.996926	0.974944	0.947566	0.937353
THCA	74	0.960027	0.890124	0.925506	0.907405
THCA	75	0.897621	0.913146	0.893854	0.880774
THCA	76	1.01567	0.980363	0.997114	0.977888
THCA	77	0.992313	0.956019	0.972031	0.974856
THCA	78	0.934679	0.908155	0.921805	0.943101
THCA	79	0.94448	0.892404	0.898313	0.883087
THCA	80	0.910009	0.927628	0.904541	0.924655
THCA	81	1.01056	1.03188	1.00657	1.0084
THCA	82	0.975232	1.14337	1.05721	1.09837
THCA	83	1.01502	1.00551	1.06776	0.989987
THCA	84	0.950021	0.928352	0.867222	0.802557
THCA	85	0.951626	0.94761	0.957803	0.975288
THCA	86	1.00063	0.979724	0.982995	0.997959
THCA	87	0.886371	0.897916	0.962025	0.917233
THCA	88	0.974718	0.920366	0.911969	0.887358
THCA	89	1.03111	1.00237	0.997644	0.987625
THCA	90	0.961123	0.941392	0.915154	0.904692
THCA	91	0.982194	0.948551	0.817957	0.920312
THCA	92	0.937348	0.951479	0.908061	1.03193
THCA	93	0.970411	1.00757	0.92573	0.990965
THCA	94	0.980172	1.047	1.00245	1.10027
THCA	95	0.97373	0.965005	0.889877	0.882185
THCA	96	1.00619	0.994599	0.978312	0.969473
THCA	97	0.906029	0.917365	0.891007	0.900788
THCA	98	0.928318	0.87579	0.80115	0.826266
THCA	99	0.936268	0.859949	0.801108	0.844462
THCA	100	0.946886	0.921814	0.890976	0.81593

## Sheet: Supplementary Table 2
Supplementary Table 2: The numbers of gene expression features used by RF algorithm (RF), SVR algorithm (SVR), PrognosiT algorithm with the Hallmark gene set collection (MKL[H]) and PrognosiT algorithm with the Pathway Interaction Database pathway collection (MKL[P]) obtained, in each replication on thyroid carcinoma (i.e. THCA) dataset.
Cohort	Replication	RF	SVM	MKL[H]	MKL[P]
THCA	1	19814	19814	1314	729
THCA	2	19814	19814	1832	1091
THCA	3	19814	19814	1340	1007
THCA	4	19814	19814	1886	829
THCA	5	19814	19814	1624	690
THCA	6	19814	19814	1615	957
THCA	7	19814	19814	2306	785
THCA	8	19814	19814	2138	647
THCA	9	19814	19814	2129	784
THCA	10	19814	19814	2137	792
THCA	11	19814	19814	1884	687
THCA	12	19814	19814	1928	926
THCA	13	19814	19814	1867	927
THCA	14	19814	19814	2223	971
THCA	15	19814	19814	1572	920
THCA	16	19814	19814	1459	717
THCA	17	19814	19814	1496	874
THCA	18	19814	19814	2427	893
THCA	19	19814	19814	1715	867
THCA	20	19814	19814	1788	489
THCA	21	19814	19814	1578	816
THCA	22	19814	19814	1659	759
THCA	23	19814	19814	1760	768
THCA	24	19814	19814	1328	621
THCA	25	19814	19814	1674	783
THCA	26	19814	19814	1619	903
THCA	27	19814	19814	1560	820
THCA	28	19814	19814	1358	843
THCA	29	19814	19814	1566	831
THCA	30	19814	19814	1807	793
THCA	31	19814	19814	1804	835
THCA	32	19814	19814	2022	1023
THCA	33	19814	19814	1637	999
THCA	34	19814	19814	1779	861
THCA	35	19814	19814	2187	898
THCA	36	19814	19814	1084	501
THCA	37	19814	19814	1897	894
THCA	38	19814	19814	1783	753
THCA	39	19814	19814	2001	770
THCA	40	19814	19814	1816	830
THCA	41	19814	19814	2317	975
THCA	42	19814	19814	1610	717
THCA	43	19814	19814	1523	827
THCA	44	19814	19814	1406	755
THCA	45	19814	19814	1875	763
THCA	46	19814	19814	2121	735
THCA	47	19814	19814	1865	704
THCA	48	19814	19814	1207	462
THCA	49	19814	19814	2244	955
THCA	50	19814	19814	1518	754
THCA	51	19814	19814	2197	790
THCA	52	19814	19814	1862	896
THCA	53	19814	19814	2061	652
THCA	54	19814	19814	2384	551
THCA	55	19814	19814	2345	1038
THCA	56	19814	19814	1960	786
THCA	57	19814	19814	977	326
THCA	58	19814	19814	2229	847
THCA	59	19814	19814	1266	877
THCA	60	19814	19814	2049	459
THCA	61	19814	19814	1206	893
THCA	62	19814	19814	1469	930
THCA	63	19814	19814	1966	824
THCA	64	19814	19814	1590	567
THCA	65	19814	19814	1365	691
THCA	66	19814	19814	1632	906
THCA	67	19814	19814	1831	895
THCA	68	19814	19814	2284	864
THCA	69	19814	19814	2508	957
THCA	70	19814	19814	2341	689
THCA	71	19814	19814	1914	609
THCA	72	19814	19814	1886	553
THCA	73	19814	19814	2041	660
THCA	74	19814	19814	993	681
THCA	75	19814	19814	1671	1077
THCA	76	19814	19814	823	1006
THCA	77	19814	19814	1257	781
THCA	78	19814	19814	1676	732
THCA	79	19814	19814	1891	851
THCA	80	19814	19814	1382	575
THCA	81	19814	19814	2290	697
THCA	82	19814	19814	1692	777
THCA	83	19814	19814	2468	758
THCA	84	19814	19814	1420	844
THCA	85	19814	19814	2182	929
THCA	86	19814	19814	1653	894
THCA	87	19814	19814	1884	609
THCA	88	19814	19814	1635	785
THCA	89	19814	19814	1591	807
THCA	90	19814	19814	1234	946
THCA	91	19814	19814	2182	779
THCA	92	19814	19814	1412	1028
THCA	93	19814	19814	1887	402
THCA	94	19814	19814	2173	919
THCA	95	19814	19814	1413	842
THCA	96	19814	19814	2011	986
THCA	97	19814	19814	2018	742
THCA	98	19814	19814	2196	704
THCA	99	19814	19814	1916	925
THCA	100	19814	19814	1582	827

## Sheet: Supplementary Table 3
Supplementary Table 3: Selection frequencies of 50 gene sets in the Hallmark collection by PrognosiT algorithm in 100 replications on thyroid carcinoma (i.e. THCA) dataset.
Replication	HALLMARK_TNFA_SIGNALING_VIA_NFKB	HALLMARK_HYPOXIA	HALLMARK_CHOLESTEROL_HOMEOSTASIS	HALLMARK_MITOTIC_SPINDLE	HALLMARK_WNT_BETA_CATENIN_SIGNALING	HALLMARK_TGF_BETA_SIGNALING	HALLMARK_IL6_JAK_STAT3_SIGNALING	HALLMARK_DNA_REPAIR	HALLMARK_G2M_CHECKPOINT	HALLMARK_APOPTOSIS	HALLMARK_NOTCH_SIGNALING	HALLMARK_ADIPOGENESIS	HALLMARK_ESTROGEN_RESPONSE_EARLY	HALLMARK_ESTROGEN_RESPONSE_LATE	HALLMARK_ANDROGEN_RESPONSE	HALLMARK_MYOGENESIS	HALLMARK_PROTEIN_SECRETION	HALLMARK_INTERFERON_ALPHA_RESPONSE	HALLMARK_INTERFERON_GAMMA_RESPONSE	HALLMARK_APICAL_JUNCTION	HALLMARK_APICAL_SURFACE	HALLMARK_HEDGEHOG_SIGNALING	HALLMARK_COMPLEMENT	HALLMARK_UNFOLDED_PROTEIN_RESPONSE	HALLMARK_PI3K_AKT_MTOR_SIGNALING	HALLMARK_MTORC1_SIGNALING	HALLMARK_E2F_TARGETS	HALLMARK_MYC_TARGETS_V1	HALLMARK_MYC_TARGETS_V2	HALLMARK_EPITHELIAL_MESENCHYMAL_TRANSITION	HALLMARK_INFLAMMATORY_RESPONSE	HALLMARK_XENOBIOTIC_METABOLISM	HALLMARK_FATTY_ACID_METABOLISM	HALLMARK_OXIDATIVE_PHOSPHORYLATION	HALLMARK_GLYCOLYSIS	HALLMARK_REACTIVE_OXIGEN_SPECIES_PATHWAY	HALLMARK_P53_PATHWAY	HALLMARK_UV_RESPONSE_UP	HALLMARK_UV_RESPONSE_DN	HALLMARK_ANGIOGENESIS	HALLMARK_HEME_METABOLISM	HALLMARK_COAGULATION	HALLMARK_IL2_STAT5_SIGNALING	HALLMARK_BILE_ACID_METABOLISM	HALLMARK_PEROXISOME	HALLMARK_ALLOGRAFT_REJECTION	HALLMARK_SPERMATOGENESIS	HALLMARK_KRAS_SIGNALING_UP	HALLMARK_KRAS_SIGNALING_DN
1	0	1	0	0	0	0	0	0	0	0	1	1	0	0	0	0	0	0	0	0	0	1	0	0	0	0	0	0	0	1	1	1	0	0	0	0	0	0	0	0	0	0	0	0	0	0	1	0	1
2	0	1	0	0	0	0	0	0	0	0	1	1	0	0	1	1	0	0	0	0	0	1	0	0	0	0	0	0	0	1	1	1	1	0	0	0	0	0	0	1	0	0	0	1	0	0	1	1	1
3	0	1	1	0	0	0	1	0	0	0	1	0	0	0	0	0	0	0	0	0	0	0	0	0	0	0	0	0	0	0	1	1	1	0	0	0	0	0	0	0	0	0	0	0	0	0	1	1	1
4	0	1	0	0	0	0	0	0	0	0	1	0	1	0	1	0	0	0	0	0	0	0	0	0	0	0	0	0	1	1	1	1	1	0	1	0	0	0	0	1	0	1	0	0	0	0	1	1	1
5	0	1	1	0	0	0	0	0	1	0	1	0	0	0	0	1	0	0	0	0	0	1	0	0	0	0	1	0	0	0	1	1	1	0	0	0	0	0	0	0	0	0	0	0	0	0	1	0	1
6	1	1	0	0	0	0	0	0	0	0	0	0	0	0	0	1	0	0	0	0	1	0	0	0	0	0	0	0	0	0	1	1	1	0	0	0	0	0	0	1	0	0	0	1	0	0	1	1	1
7	0	1	0	0	0	0	0	0	1	1	1	0	0	1	0	1	0	0	1	1	1	0	0	0	0	0	0	0	0	0	1	1	1	0	1	0	1	0	0	0	0	0	0	1	0	0	1	0	1
8	0	1	0	0	0	0	0	0	0	0	1	0	0	1	0	0	0	0	0	0	0	0	0	0	0	0	1	1	0	0	1	1	0	0	0	1	1	0	0	0	1	1	0	0	1	0	1	1	1
9	0	1	0	0	0	0	0	0	0	1	0	0	0	0	0	1	0	0	1	1	0	1	0	0	0	0	0	0	1	0	1	1	1	0	0	0	1	0	0	0	0	1	0	0	1	0	1	1	1
10	0	1	1	0	0	0	0	0	0	0	1	0	0	1	0	1	0	0	0	1	0	1	0	0	0	0	1	0	0	0	1	1	0	0	0	0	1	0	0	1	0	0	1	0	0	0	1	1	1
11	0	1	1	0	0	0	0	0	0	0	1	0	1	0	0	0	0	0	0	0	0	0	0	0	0	0	1	0	0	0	1	1	1	0	0	0	1	0	0	0	0	1	0	0	0	0	1	1	1
12	0	1	0	0	0	0	0	0	0	1	0	0	0	0	1	1	0	0	0	0	0	0	0	0	0	0	1	0	0	0	1	1	1	0	0	0	1	0	0	0	0	0	0	0	1	0	1	1	1
13	0	1	1	0	0	0	0	0	1	1	1	0	0	0	0	0	0	0	0	0	0	0	0	0	0	0	0	0	0	0	1	1	1	0	1	0	0	0	0	1	0	1	0	1	0	0	1	1	1
14	0	1	0	0	0	0	0	0	0	1	1	0	0	1	0	1	0	0	0	1	0	1	0	0	0	0	0	1	1	0	1	1	1	0	0	0	1	0	0	0	1	0	0	0	0	0	1	0	1
15	0	1	0	0	0	0	0	0	0	0	1	1	0	0	0	0	0	0	0	0	0	0	0	0	0	0	0	0	0	0	1	1	1	0	0	0	0	0	0	1	1	0	0	0	0	0	1	1	1
16	0	1	1	0	0	0	0	0	0	0	1	0	0	0	0	0	0	0	0	0	0	0	0	0	0	0	1	0	0	0	1	1	1	0	0	0	0	0	0	1	0	1	0	0	0	0	1	0	1
17	0	1	0	0	0	0	0	0	0	0	1	0	0	0	0	0	0	0	0	0	0	1	0	0	0	0	0	0	0	0	1	1	1	0	0	0	1	0	0	0	0	0	0	1	0	0	1	1	1
18	0	1	1	0	0	0	0	0	1	1	0	0	0	0	0	1	0	0	0	0	0	0	1	0	0	0	1	0	0	1	1	1	1	0	1	0	1	0	0	0	0	0	1	0	0	0	1	1	1
19	0	1	0	0	0	0	0	1	1	0	1	0	0	0	0	0	0	0	0	0	0	0	0	0	0	0	0	0	0	0	1	1	1	0	0	0	1	0	0	1	0	0	0	0	0	0	1	1	1
20	0	1	0	0	0	0	0	0	0	0	1	0	0	0	0	0	0	0	0	0	0	1	0	0	0	0	1	0	1	0	1	1	1	0	1	0	0	0	0	0	0	1	0	1	0	0	1	1	1
21	0	1	0	0	0	0	0	1	1	0	1	0	0	0	0	0	0	0	0	0	0	0	0	0	0	0	0	0	0	1	1	1	1	0	0	0	0	0	0	1	0	0	0	0	0	0	1	0	1
22	0	1	0	0	0	0	0	0	0	1	0	0	0	0	0	1	0	0	0	1	0	1	0	0	0	0	0	0	0	1	1	1	1	0	0	0	0	0	0	0	0	0	0	0	0	0	1	0	1
23	1	1	0	0	0	0	0	0	0	0	0	1	0	0	1	1	0	1	0	0	0	0	0	0	0	0	0	0	0	0	1	1	0	0	0	0	0	0	0	1	0	0	0	1	0	0	1	1	1
24	1	1	0	0	0	0	0	0	0	0	1	0	0	1	0	0	0	0	0	0	0	0	0	0	0	0	0	0	1	0	0	0	0	0	1	0	0	0	1	0	0	1	0	0	0	0	1	0	1
25	0	1	0	0	0	0	0	1	0	1	1	0	0	0	0	0	0	0	0	0	0	1	0	0	0	0	1	0	0	0	1	1	1	0	0	0	0	0	0	0	0	1	0	0	0	0	0	1	1
26	0	1	0	0	0	0	0	0	0	0	1	0	0	0	1	1	0	0	0	0	0	0	0	0	0	0	0	0	0	0	1	1	1	0	0	0	1	0	0	0	0	0	0	0	0	0	1	1	1
27	1	1	0	0	0	0	0	0	0	0	0	1	0	0	0	0	0	0	0	0	0	0	0	0	0	0	0	0	0	1	1	1	1	0	0	0	0	0	0	0	0	1	0	0	0	0	1	0	1
28	0	1	0	0	0	0	0	0	0	0	0	0	0	0	0	0	0	0	0	0	0	1	0	0	0	0	0	0	0	0	1	1	1	0	0	1	0	0	0	0	0	0	0	1	0	0	1	1	1
29	0	1	0	0	1	0	0	0	1	0	1	0	0	0	0	0	0	0	1	0	0	1	0	0	0	0	1	0	0	0	1	1	0	0	0	0	0	0	0	1	0	0	0	0	1	0	1	0	1
30	0	1	0	0	1	0	0	0	0	0	0	0	0	1	0	1	0	0	0	1	0	0	0	0	1	0	0	0	0	0	1	1	1	0	0	0	1	0	0	0	0	0	0	0	0	0	1	0	1
31	0	1	0	0	0	1	0	0	1	0	1	0	0	1	0	0	0	0	0	1	0	0	0	0	0	0	0	0	1	0	1	0	0	0	1	0	1	0	0	0	0	0	1	0	0	0	1	0	1
32	1	1	1	0	1	0	0	0	0	1	1	0	0	0	0	0	0	0	0	0	0	1	0	0	0	0	0	1	0	0	1	1	1	0	1	0	1	0	0	1	0	1	0	1	0	0	1	0	1
33	0	1	0	0	0	0	0	0	0	1	1	1	0	0	0	0	0	0	0	0	0	1	0	0	0	0	0	0	0	0	1	1	1	0	0	0	0	0	0	0	0	0	0	1	1	0	1	1	1
34	0	1	0	0	0	0	0	0	0	0	1	1	1	0	0	0	0	0	0	0	0	1	0	0	0	0	0	0	0	0	1	1	1	0	1	0	0	0	0	1	0	0	0	1	0	0	1	1	1
35	0	1	0	0	0	0	0	0	1	0	1	1	0	0	0	1	0	0	1	0	0	0	0	0	0	0	0	0	0	1	1	1	1	0	1	0	0	0	1	1	0	0	0	0	0	0	1	1	1
36	0	1	0	0	0	0	0	1	0	0	1	0	0	0	0	0	0	0	0	0	0	0	0	0	0	0	0	0	1	0	0	0	0	0	1	0	1	0	0	1	0	0	0	0	1	0	0	0	1
37	1	1	0	0	0	0	0	0	0	0	1	0	0	0	0	1	0	0	0	0	0	0	0	0	0	0	1	0	0	0	1	1	1	0	1	0	0	0	0	1	0	0	0	1	0	0	1	1	1
38	1	1	0	0	0	1	0	1	0	0	1	0	0	1	0	0	0	0	0	0	0	0	0	0	0	0	0	0	1	0	0	0	1	0	1	0	1	0	0	0	0	0	1	1	0	0	1	0	1
39	1	1	1	0	0	0	0	0	0	0	0	1	0	0	0	1	0	0	0	0	0	1	0	0	0	0	1	0	0	1	1	1	0	0	0	0	0	0	0	1	0	0	0	0	1	0	1	1	1
40	0	1	0	0	0	0	0	0	0	0	0	1	0	0	0	1	0	0	0	0	0	1	0	0	0	0	0	0	0	1	1	1	0	0	0	0	1	0	0	1	0	1	0	0	0	0	1	1	1
41	0	1	1	0	0	0	0	0	1	0	0	0	0	0	0	0	0	0	0	1	0	0	1	0	0	0	0	1	0	1	1	1	1	0	0	1	1	0	0	1	0	0	0	1	0	0	1	1	1
42	0	1	0	0	0	0	0	0	1	0	1	0	0	0	0	0	0	0	0	0	0	0	0	0	0	0	0	0	0	0	1	1	1	0	1	0	0	0	0	1	0	0	0	0	1	0	1	1	1
43	0	1	0	0	1	1	0	1	0	0	1	0	0	0	0	0	0	0	0	1	0	0	0	0	0	0	0	0	1	0	0	0	1	0	1	0	0	0	0	1	0	0	1	1	1	0	0	0	1
44	1	1	0	0	0	0	0	0	1	0	1	0	0	0	0	0	0	0	0	0	0	0	0	0	0	0	0	0	1	0	1	0	0	0	1	0	0	0	0	1	0	0	1	0	0	0	1	0	1
45	0	1	0	0	0	0	0	1	0	0	1	0	0	0	0	1	0	0	0	0	0	0	1	0	0	0	1	0	0	0	1	1	1	0	0	1	0	0	0	0	0	1	0	0	1	0	1	0	1
46	0	1	1	0	0	0	0	0	1	0	1	1	0	0	0	0	0	1	1	0	0	1	0	0	0	0	1	0	0	1	1	0	1	0	0	1	1	0	0	1	0	0	0	0	0	0	1	1	1
47	0	1	1	0	0	1	0	0	0	0	0	1	0	0	0	1	0	0	0	0	0	0	1	0	0	0	0	0	0	0	1	1	0	0	1	0	0	0	0	1	0	0	0	1	0	0	1	1	1
48	0	1	0	0	0	0	1	0	0	0	1	0	0	0	1	0	0	0	0	0	0	0	0	0	0	0	0	0	0	0	1	1	1	0	0	0	0	0	0	1	0	0	0	0	0	0	1	0	1
49	0	1	0	0	0	0	0	0	1	1	1	0	0	0	0	1	0	0	0	1	0	0	1	0	0	0	1	0	0	0	1	0	1	0	1	0	1	0	0	0	0	1	1	0	0	0	1	0	1
50	1	1	1	0	0	0	0	0	0	0	0	0	0	0	0	1	0	0	0	0	0	0	0	0	0	0	0	0	0	0	1	1	1	0	0	0	0	0	0	1	0	0	0	0	0	0	1	1	1
51	1	1	0	0	0	0	0	0	0	0	0	0	0	1	0	0	0	1	0	1	0	0	1	0	0	0	0	0	0	1	1	1	1	0	1	0	1	0	0	0	0	1	0	1	0	0	1	0	1
52	0	1	0	0	1	0	0	0	1	0	1	0	0	0	0	0	0	0	0	0	0	0	0	0	0	0	0	0	0	1	1	1	1	0	1	0	1	0	0	1	0	0	0	0	0	0	1	1	1
53	0	1	1	0	0	0	0	0	1	0	1	0	0	1	0	0	0	0	0	0	0	0	0	0	0	0	1	0	0	0	1	1	0	0	1	0	1	0	0	1	0	1	0	0	1	0	1	1	1
54	0	1	0	0	0	0	0	0	1	1	1	0	0	0	0	1	0	1	0	1	0	0	0	0	0	0	0	1	1	0	1	1	1	0	1	0	1	0	0	1	0	1	0	1	0	0	1	0	1
55	1	1	1	0	0	0	0	0	0	1	0	0	0	1	0	1	0	0	1	1	0	0	0	0	0	0	0	0	0	1	1	1	1	0	0	0	1	0	0	0	0	0	0	1	0	0	1	1	1
56	0	1	0	0	0	0	0	1	0	0	1	0	0	0	0	1	0	0	0	0	0	0	0	0	0	0	1	0	0	0	1	1	0	0	1	0	0	0	0	1	0	1	0	1	1	0	1	1	1
57	0	1	0	0	0	0	0	0	0	0	1	0	0	1	0	0	0	0	0	0	0	0	0	0	0	0	0	0	1	0	0	0	0	0	1	0	0	0	0	1	0	0	0	0	0	0	1	0	1
58	0	1	0	0	0	0	0	0	1	0	1	0	0	1	0	0	0	0	1	1	0	0	1	0	0	0	0	0	0	1	1	1	1	0	0	0	1	1	0	0	0	0	0	0	0	0	1	0	1
59	1	1	0	0	1	0	0	0	0	0	1	0	0	0	0	0	0	0	0	0	0	0	0	0	0	0	0	1	1	0	0	0	0	0	1	0	0	0	0	1	0	0	0	1	0	0	1	0	1
60	0	1	1	0	0	0	0	1	0	0	1	0	0	0	0	0	0	0	0	1	0	1	0	0	1	0	1	1	0	1	1	1	1	0	0	0	0	0	0	1	0	0	0	0	0	0	1	0	1
61	1	1	0	0	1	0	0	0	0	1	1	0	0	0	0	1	0	0	0	0	0	0	0	0	0	0	0	0	0	0	0	0	1	0	0	0	0	0	0	0	0	0	0	0	0	0	1	0	1
62	0	1	0	0	0	0	0	0	0	0	0	0	0	0	1	1	0	0	0	0	0	1	0	0	0	0	0	0	0	0	1	1	1	0	0	0	0	0	0	1	0	0	0	0	0	0	1	1	1
63	0	1	0	0	0	0	0	0	0	0	0	0	0	0	0	1	0	0	0	0	0	1	0	0	0	0	1	0	0	1	1	1	1	0	0	0	1	0	0	1	1	0	0	0	1	0	1	0	1
64	0	1	0	0	0	0	0	0	0	0	0	0	0	0	1	0	0	0	0	1	0	1	0	0	0	0	0	0	0	0	1	1	1	0	0	0	0	0	0	1	0	0	0	1	0	0	1	1	1
65	0	1	0	0	0	0	0	0	0	0	1	1	0	0	0	0	0	0	0	0	0	0	0	0	0	0	0	0	0	0	1	1	0	0	0	0	0	0	0	0	0	0	0	1	0	0	1	1	1
66	0	1	0	0	0	0	0	0	0	0	1	1	0	0	0	0	0	0	0	0	0	0	0	0	0	0	0	0	0	1	1	1	1	0	0	0	0	0	0	1	0	0	0	1	0	0	1	1	1
67	0	1	1	0	0	0	0	1	0	0	1	0	0	0	0	0	0	0	0	0	0	1	0	0	0	0	1	0	0	0	1	1	0	0	1	0	0	0	0	1	0	1	0	0	1	0	1	1	1
68	0	1	0	0	1	0	0	0	1	1	1	0	0	1	0	1	0	0	0	0	0	0	0	0	0	0	0	0	0	1	1	1	1	0	0	0	0	0	0	0	0	1	1	1	1	0	1	1	1
69	0	1	1	0	0	0	0	0	1	0	1	0	0	0	0	1	0	0	0	1	0	0	1	0	0	0	0	0	0	1	1	1	1	0	1	0	1	0	0	0	1	0	0	1	0	0	1	1	1
70	0	1	0	0	0	0	0	0	1	1	1	0	0	1	0	1	0	0	1	1	0	0	1	0	0	0	1	0	0	0	1	1	0	0	0	0	1	1	0	1	0	0	0	0	0	0	1	0	1
71	0	1	1	0	0	0	0	0	1	0	1	0	0	0	0	1	0	0	0	0	0	1	0	0	0	0	0	0	0	0	1	1	1	0	0	0	0	0	0	1	1	0	0	1	0	0	1	1	1
72	0	1	1	0	0	0	0	0	1	1	1	0	0	0	0	0	0	0	0	0	0	1	0	0	0	0	1	0	0	1	1	0	1	0	0	0	0	0	0	1	0	1	0	0	1	0	1	1	1
73	0	1	0	0	0	0	0	0	0	0	0	1	1	0	0	1	0	0	0	1	0	0	0	0	0	0	0	0	0	1	1	1	1	0	1	0	0	0	0	1	0	0	0	0	0	0	1	1	1
74	0	1	0	0	0	1	0	0	0	0	1	0	0	1	0	0	0	0	0	0	0	0	0	0	0	0	0	0	1	0	0	0	0	0	1	0	0	0	0	0	0	0	0	0	0	0	1	0	1
75	0	1	0	0	0	0	0	0	0	1	1	0	0	0	0	0	0	0	0	0	0	0	0	0	0	0	0	0	0	0	1	1	0	0	1	0	1	0	0	0	0	1	0	1	0	0	1	1	1
76	0	1	0	0	0	0	0	0	0	0	1	0	0	1	0	0	0	0	0	0	0	0	0	0	0	0	0	0	1	0	0	0	0	0	0	0	0	0	0	1	0	0	0	0	1	0	0	0	1
77	0	1	1	0	0	0	0	0	0	0	1	0	0	0	0	0	0	0	0	0	0	0	0	0	0	0	0	0	0	0	0	1	1	0	0	0	0	0	0	1	0	1	0	0	0	0	1	1	1
78	0	1	0	0	0	0	0	0	0	0	1	0	0	0	0	0	0	0	0	0	0	0	0	0	0	0	1	0	0	1	1	1	0	0	1	0	0	0	0	1	0	1	0	0	0	0	1	1	1
79	0	1	1	0	0	0	0	0	0	0	1	0	0	0	0	1	0	0	0	1	0	0	1	0	0	0	0	0	0	1	1	1	1	0	0	0	0	0	0	1	0	0	0	0	0	0	1	1	1
80	1	1	0	0	0	0	0	0	0	0	1	0	0	1	0	0	0	0	0	0	0	0	0	0	0	0	0	0	1	0	0	0	1	0	1	0	1	0	0	0	0	0	0	0	0	0	1	0	1
81	1	1	0	0	0	0	0	0	0	1	1	0	0	0	0	0	0	1	1	1	0	1	0	0	0	0	0	1	1	0	1	1	1	0	0	0	1	0	0	0	0	1	0	1	0	0	1	1	1
82	0	1	0	0	1	0	0	0	1	1	1	0	0	0	0	0	0	0	0	0	0	0	0	0	0	0	1	0	0	0	1	1	0	0	0	0	1	0	0	0	0	0	0	0	0	0	1	1	1
83	1	1	0	0	0	0	0	0	1	1	1	1	0	1	0	1	0	0	0	1	0	1	1	0	0	0	0	0	0	1	1	1	0	0	0	0	1	0	0	0	0	0	0	0	0	0	1	1	1
84	0	1	1	0	0	0	0	0	1	0	1	0	0	0	0	0	0	0	0	0	0	0	0	0	0	0	0	0	0	0	1	1	1	0	0	0	0	0	0	1	0	0	0	1	0	0	1	0	1
85	0	1	0	0	0	0	0	0	0	0	1	1	0	1	0	0	0	0	0	0	0	1	0	0	0	0	0	1	0	0	1	1	1	0	1	0	1	1	0	0	0	1	0	0	0	0	1	1	1
86	0	1	1	0	0	0	0	0	0	0	1	0	0	0	0	0	0	0	0	0	0	0	0	0	0	0	1	0	0	1	1	1	1	0	0	0	0	0	0	1	0	0	0	0	0	0	1	1	1
87	0	1	1	0	0	0	0	0	0	0	0	0	0	1	0	1	0	0	0	0	0	1	0	0	0	0	0	0	0	0	1	1	1	0	1	0	1	0	0	0	0	1	0	1	0	0	1	0	1
88	0	1	0	0	0	0	0	0	0	0	0	0	0	0	1	0	0	0	0	1	1	0	0	0	0	0	0	0	0	1	1	1	1	0	0	0	0	0	0	0	0	0	0	0	0	0	1	1	1
89	0	1	1	0	0	0	0	0	0	0	0	0	0	0	0	1	0	0	1	0	0	0	0	0	0	0	0	0	0	0	1	1	1	0	0	0	0	0	0	1	0	0	0	0	0	0	1	1	1
90	0	1	0	0	0	0	0	0	0	0	0	0	0	0	0	0	0	0	0	0	0	0	0	0	0	0	0	0	0	0	1	1	1	0	0	0	0	0	0	1	0	0	0	0	0	0	1	1	1
91	0	1	0	0	0	0	0	0	0	1	1	1	0	1	0	0	0	1	0	0	0	1	1	0	0	0	0	1	0	1	1	1	1	0	0	0	1	0	0	0	0	0	0	0	0	0	1	0	1
92	0	1	0	0	0	0	0	0	0	0	1	0	0	0	0	0	0	0	0	0	0	0	0	0	0	0	0	0	0	1	1	1	1	0	0	0	0	0	0	1	0	0	0	0	0	0	1	1	1
93	0	1	1	0	0	0	0	1	0	0	1	0	0	0	0	0	0	0	0	1	0	1	0	0	0	0	1	0	0	0	0	1	1	0	1	1	0	0	0	0	0	1	0	0	0	0	1	1	1
94	0	1	1	0	1	0	0	0	0	0	0	0	0	0	0	1	0	0	0	0	0	1	0	0	0	0	1	1	0	1	1	1	1	0	0	0	1	0	0	0	0	1	0	0	0	0	1	1	1
95	0	1	1	0	0	0	0	0	0	0	1	0	0	0	0	1	0	0	0	0	0	1	0	0	0	0	0	0	1	0	0	1	1	0	0	0	0	0	0	1	0	1	0	0	1	0	1	0	1
96	0	0	0	0	1	0	0	0	1	1	0	0	0	0	0	0	0	0	0	1	0	0	0	0	0	0	0	0	0	1	1	1	1	0	1	0	0	0	0	0	0	1	1	1	0	0	1	0	1
97	0	1	0	0	1	0	0	0	1	0	1	0	0	0	0	0	0	0	0	1	0	0	0	0	0	0	1	1	0	0	1	1	1	0	0	0	1	0	0	0	0	0	0	0	0	0	1	1	1
98	1	1	0	0	0	0	0	0	1	0	1	0	1	0	0	0	0	0	0	0	0	0	0	0	0	0	1	0	0	1	1	1	1	0	0	0	0	0	0	1	1	0	0	1	0	0	1	1	1
99	0	1	0	0	0	0	0	0	1	0	0	0	0	0	0	1	0	0	0	0	0	0	0	0	0	0	1	0	0	0	1	1	1	0	0	0	1	0	0	1	0	0	0	1	0	0	1	1	1
100	0	1	1	0	1	1	0	1	0	0	1	0	0	0	0	0	0	0	0	0	0	0	0	0	0	0	0	0	1	0	0	1	1	0	1	0	1	0	0	0	0	1	1	0	0	0	1	0	0
[truncated: 1 more columns]

## Sheet: Supplementary Table 4
Supplementary Table 4: The kernel weights assigned to 50 gene sets in the Hallmark collection by PrognosiT algorithm in 100 replications on thyroid carcinoma (i.e. THCA) dataset.
Replication	HALLMARK_TNFA_SIGNALING_VIA_NFKB	HALLMARK_HYPOXIA	HALLMARK_CHOLESTEROL_HOMEOSTASIS	HALLMARK_MITOTIC_SPINDLE	HALLMARK_WNT_BETA_CATENIN_SIGNALING	HALLMARK_TGF_BETA_SIGNALING	HALLMARK_IL6_JAK_STAT3_SIGNALING	HALLMARK_DNA_REPAIR	HALLMARK_G2M_CHECKPOINT	HALLMARK_APOPTOSIS	HALLMARK_NOTCH_SIGNALING	HALLMARK_ADIPOGENESIS	HALLMARK_ESTROGEN_RESPONSE_EARLY	HALLMARK_ESTROGEN_RESPONSE_LATE	HALLMARK_ANDROGEN_RESPONSE	HALLMARK_MYOGENESIS	HALLMARK_PROTEIN_SECRETION	HALLMARK_INTERFERON_ALPHA_RESPONSE	HALLMARK_INTERFERON_GAMMA_RESPONSE	HALLMARK_APICAL_JUNCTION	HALLMARK_APICAL_SURFACE	HALLMARK_HEDGEHOG_SIGNALING	HALLMARK_COMPLEMENT	HALLMARK_UNFOLDED_PROTEIN_RESPONSE	HALLMARK_PI3K_AKT_MTOR_SIGNALING	HALLMARK_MTORC1_SIGNALING	HALLMARK_E2F_TARGETS	HALLMARK_MYC_TARGETS_V1	HALLMARK_MYC_TARGETS_V2	HALLMARK_EPITHELIAL_MESENCHYMAL_TRANSITION	HALLMARK_INFLAMMATORY_RESPONSE	HALLMARK_XENOBIOTIC_METABOLISM	HALLMARK_FATTY_ACID_METABOLISM	HALLMARK_OXIDATIVE_PHOSPHORYLATION	HALLMARK_GLYCOLYSIS	HALLMARK_REACTIVE_OXIGEN_SPECIES_PATHWAY	HALLMARK_P53_PATHWAY	HALLMARK_UV_RESPONSE_UP	HALLMARK_UV_RESPONSE_DN	HALLMARK_ANGIOGENESIS	HALLMARK_HEME_METABOLISM	HALLMARK_COAGULATION	HALLMARK_IL2_STAT5_SIGNALING	HALLMARK_BILE_ACID_METABOLISM	HALLMARK_PEROXISOME	HALLMARK_ALLOGRAFT_REJECTION	HALLMARK_SPERMATOGENESIS	HALLMARK_KRAS_SIGNALING_UP	HALLMARK_KRAS_SIGNALING_DN
1	1.97015e-05	0.119974	0.00490893	0	0	0	0	0	0	0	0.0278928	0.0823256	0.00398153	2.0302e-05	0	0	0	0	0	2.43606e-05	0	0.0141338	0	0	0	0	0	0	0	0.056195	0.0924397	0.115177	0.00798791	0	0.00148565	0	2.9511e-05	0	0.000559631	0.00563067	0.000240336	2.57525e-05	0	0	0	2.37929e-05	0.153534	0.00790495	0.288509
2	0.00063568	0.0548051	1.12583e-05	0	0	0	0	0	0.000101789	6.16449e-05	0.0292288	0.0126539	0.00114843	0	0.0526825	0.0281486	0	0	0	0	1.69312e-05	0.0121835	0.000856726	0	0	0	0	0	0	0.0169504	0.135888	0.129913	0.0283607	0	0.00132154	0	0.0038966	0.00229443	0	0.0371026	1.23751e-05	0.00916197	0	0.0478493	0.000458609	0	0.119851	0.07985	0.191624
3	1.42416e-05	0.142885	0.0234591	0	0	0	0.0146865	0.0075035	0.00677777	0	0.0208173	0.000116179	0	0	0	8.14552e-05	0	0	2.1554e-05	0	0	0.000165232	0	0	0.000109335	0	0.000783504	0.00956583	0	0.00836435	0.088262	0.120985	0.0948473	0	0	0	0.0015617	0	0.000404782	0.00198622	1.86912e-05	0	1.38417e-05	0.00129316	0.00976893	0	0.116629	0.0895734	0.180367
4	0.00389201	0.0984251	1.84087e-05	3.16543e-05	0	0	0	0	0	1.38903e-05	0.0106587	0.00264979	0.0179238	0.000882583	0.0332114	0.00689196	0	0	0	0.00846604	0	0	0.00010438	0	0	0.00014967	0	0	0.0261993	0.0114145	0.133016	0.138015	0.0186648	0	0.01166	0	0.000107481	3.17203e-05	0.000115986	0.0205439	0.00157022	0.0366996	0.001989	0.000494533	0.0016858	0	0.122828	0.0489182	0.200742
5	0.00563742	0.143121	0.0168406	0	0	6.71297e-05	6.37105e-05	1.88974e-05	0.0212334	0	0.0221739	0.00131027	0.00408117	0	1.80484e-05	0.0282749	0	0.00259406	0.000376301	0.000282923	0	0.0391894	0	0	0	0	0.02017	0	0.00687163	0.000118239	0.0695254	0.130991	0.0507114	0	0.00681795	1.86582e-05	0.00127757	6.86884e-05	0.000111042	5.2313e-05	0.00109639	1.49977e-05	0	0.00017681	0.00393819	0	0.141042	0.00542888	0.238824
6	0.0133533	0.095691	0	0	0	0	1.87909e-05	0	0.000142175	0	1.0724e-05	0.00824807	0.000316786	3.924e-05	0.000238769	0.0527799	0	0	0	0.00583615	0.0316261	6.80846e-05	0.000508982	0	0	0	0.00149631	0	0	0	0.126221	0.160074	0.048346	0	0	0	0.000207725	0.00536126	0	0.0471021	0	0.00127594	7.69467e-05	0.0170428	0	0	0.128891	0.0581103	0.182068
7	0	0.134369	0.00202185	0	0	0	0.000182756	0.000116363	0.0115854	0.0127157	0.0365929	0	0	0.0371772	0	0.0582495	0	0.000755878	0.0176816	0.059943	0.0136422	0.000502306	0	0.000116162	0	0	0.000145933	0.0055138	0	0.00447227	0.0353605	0.0826698	0.0664821	0	0.0158293	0	0.0313216	0	0	0	0	0	0	0.0508046	8.82323e-05	0	0.0536522	0.00075002	0.219641
8	0	0.111047	0.000623052	0	0	0	0	2.73089e-05	0	0	0.0823594	1.34746e-05	1.38494e-05	0.0337409	0	1.52825e-05	0	2.0488e-05	0	0.000832468	0	0.00023241	0	0	0.00171403	8.83584e-05	0.0102861	0.0368981	0.00974312	0	0.0952857	0.0370114	0.00174651	0	0	0.0189524	0.072258	0.000303676	0	4.083e-05	0.0212915	0.0585282	1.6786e-05	0.00029278	0.0196125	0	0.106384	0.0585203	0.15973
9	0.000223623	0.0943561	0.00142889	0	0.00103551	0	0	0.000107432	6.67187e-05	0.0632484	0.00852805	0.00312506	0	0.00538782	0	0.0164105	0	3.21703e-05	0.0476035	0.0315765	3.58349e-05	0.0412724	0	0	0	0	0	0.00423104	0.0101884	0.00302305	0.114574	0.0495739	0.0616781	0	0.00417768	0	0.0544621	3.06377e-05	0	0	0	0.0166376	0	0.00306782	0.0225152	0	0.0944257	0.0259192	0.154824
10	0	0.138917	0.0336866	0	0	0	0	1.10841e-05	1.96555e-05	9.39613e-05	0.0186366	1.09128e-05	0.00314299	0.0388504	0.000187798	0.0268495	0	0.00393129	0.000358326	0.0130129	0	0.0151458	0.000484075	0	0	0.00195498	0.0256476	0.00169583	0.00301268	0.000417749	0.102215	0.0764097	0.000119687	0	0.00032143	0	0.0347137	0.00148543	0	0.0216574	0.0070008	3.92791e-05	0.0148737	0.00663598	2.22668e-05	2.17876e-05	0.0928735	0.018604	0.243559
11	0.00088327	0.119584	0.0154313	0.000693429	0	0	0	0.00164428	0.00361816	2.26432e-05	0.0765108	0	0.0154689	1.68e-05	0	0.00322185	0	0	0	0	0	0	0	0	1.73274e-05	4.49522e-05	0.0780248	0	0	0.00674492	0.0161317	0.134974	0.0200181	0	0.000701099	0.000551111	0.0232772	0	0.00231772	0	0	0.0178401	0.000793356	4.96824e-05	0.00656048	0	0.115214	0.0681695	0.177961
12	0.00418835	0.0614033	0	0	0.00519436	0	0	0.00326349	0.000750518	0.0403484	0.0042258	0.000171129	4.70394e-05	0.00382306	0.0251046	0.0405677	0	0.00508872	0.000433405	0	0	4.50793e-05	0	0	4.13e-05	1.61644e-05	0.014243	0	0	0.000677172	0.109721	0.141497	0.0321046	0	3.92736e-05	0	0.0243917	9.88905e-05	0	0	0.000104952	1.10755e-05	0.000612834	6.31966e-05	0.0558577	0.000254669	0.152513	0.074076	0.173886
13	0.000972844	0.113086	0.0343232	0	0	0	0	0.00874688	0.0132553	0.0636202	0.0377178	4.56331e-05	0	3.07283e-05	0.00808539	1.4313e-05	0	0	1.12633e-05	0	0	0.00299957	0	0	0	3.41765e-05	0.00344465	0	0	0	0.0323753	0.0394403	0.0656738	0	0.045537	0.000184806	0.00610308	0.000410313	0	0.0231836	0	0.0163995	5.66737e-05	0.0232548	0.000734326	0	0.126145	0.049231	0.257408
14	8.76727e-05	0.0287217	0	0	0	0	0	0	0	0.0333135	0.0468498	0.00053208	0	0.0732661	0	0.0135285	0	0	0	0.0111842	0	0.0121754	0	0	0.000448131	1.57821e-05	0	0.0483336	0.0179493	0.00175465	0.176105	0.075126	0.0142227	0	0	0.000199105	0.0866664	1.75617e-05	0	0	0.0271911	0	0	0.000733414	0	0	0.138532	0.00789326	0.144548
15	0	0.118785	0.00748288	0	0	0.000102331	0.0024282	0	0	0	0.0219903	0.037194	0.000486831	0.000276052	0	0.000445193	0	0	0	0	0	0	0	0	0	5.16048e-05	0	6.80165e-05	0.000116702	0.00333402	0.0882168	0.148781	0.0284003	0.00494531	3.84865e-05	0	0.00515293	0.00028147	0	0.0369168	0.0128924	0	0	1.48195e-05	0.000524272	0	0.137691	0.0827461	0.20911
16	0	0.144513	0.0179687	0	0.000181606	0	0	0	0.000548281	1.51008e-05	0.116897	0.00118632	0.000589694	0	0	0.000192098	0	0	0.0010315	0	0	0	1.01676e-05	0	2.74003e-05	0	0.0440649	0	0	0.00010885	0.0662521	0.0960003	0.0661811	0	3.03283e-05	0.00209718	0.000728318	0	0	0.0244268	0.000195547	0.0582666	0	0.00800445	0.00185515	0	0.0963482	0.000197914	0.211278
17	0.000234821	0.167871	0.00165924	0	0	0	1.75089e-05	0	0.00163679	0.00117657	0.0626315	0.000899216	0	0	1.76834e-05	8.50718e-05	0	0	0	0	0	0.0362185	0	0	1.68995e-05	0.000149606	0.0013237	0.000614927	0	0.00124233	0.0923464	0.100928	0.0380956	0	0.00100826	7.33459e-05	0.0362439	0.0019012	2.67599e-05	0.00378591	0	0.000205862	0	0.037556	0	0	0.114403	0.0632561	0.19928
18	0	0.0339321	0.0452758	0	0.000191343	0	0	0.000625849	0.0652442	0.0689351	0.000158791	0	0.000406629	4.28022e-05	0	0.0203568	0	0	0	0.00134806	0	0.00725639	0.0189315	0	0	0	0.0163404	0	0	0.0408632	0.128837	0.0238183	0.0350814	0	0.0224307	0.00929703	0.0216771	4.38251e-05	0	0.00144901	2.6014e-05	6.43626e-05	0.0488707	0.00451162	0.00111788	0	0.0491544	0.132821	0.190265
19	0.000738982	0.0941854	0.00271149	3.43583e-05	0.000731805	0	1.32861e-05	0.067529	0.0213663	1.04512e-05	0.0574559	0.000537694	0.000116946	2.83338e-05	0.00063426	0.00577464	0	0	0	0	0	5.27669e-05	0	0	0	1.30508e-05	0.00100447	0	0	0.00026622	0.103325	0.166285	0.0204691	0	3.02535e-05	0.00541541	0.01614	0.00460704	0	0.0335418	2.91697e-05	0	0.000507329	0.00294262	0	0	0.0876252	0.0458657	0.210023
20	0	0.0649484	0	0.000127158	0	0	0	0.00114058	2.6643e-05	0.00271097	0.0705492	0.000348829	0	0.000463906	0.0012313	0.00133343	0	0	0	0	0	0.0339237	0.00723298	0	0.00321697	0	0.0668266	0	0.0134938	0.000730605	0.0758006	0.0395958	0.0131089	0	0.0266003	1.55951e-05	0.00160578	0	0	0.00493031	0.00216123	0.0749842	0.000425902	0.0216724	0.00619855	0	0.142367	0.086586	0.182771
21	0	0.12862	0.0060252	3.53253e-05	0.000415768	0	7.1537e-05	0.0226164	0.0616126	0.00814105	0.0463067	0	0.000390415	0	2.58282e-05	4.99949e-05	0	1.933e-05	0.000805787	0	0	0	0.000561091	0	4.71279e-05	0	0.00907556	0	0	0.0326514	0.0644533	0.231015	0.0373886	0	0.000356084	0.00570552	0.00365298	0	8.73905e-05	0.0200273	3.58229e-05	0.00261776	0.00366089	0.000214888	0	0	0.0620284	0.00448316	0.201047
22	0.00626714	0.13406	0	0	0.00606838	0	0	0	3.25163e-05	0.0191725	0.00671231	0.000288368	0	0.00112475	0.000419781	0.0624334	0	0	0.000702983	0.0156979	0.00684847	0.0227248	0.000525191	0	3.78619e-05	4.99844e-05	0	0.00275284	0	0.0299274	0.10177	0.100964	0.0697007	0	0.00148992	3.41921e-05	0.00905148	0	0.00806332	0.0011487	0.000362879	0	2.49039e-05	0.0067894	0.00749883	0	0.125759	0.00445774	0.196051
23	0.0347938	0.0715645	0.000992454	0	0	0	0	0	0.00527925	0.00501264	8.99016e-05	0.0242597	0.0023383	0.00273658	0.0232888	0.0184758	0	0.0230662	0	0.00151311	0.00695911	6.21487e-05	4.16306e-05	0	0	0	0	0	0	0.00857092	0.16676	0.0975221	0.00407062	0	0.000386433	0	1.77745e-05	0	0	0.0345155	1.67864e-05	0	0	0.0128748	0	0	0.149205	0.0396803	0.25011
24	0.0317195	0.221709	0.000860567	0	0	0.00035006	0	8.54851e-05	0	0	0.164019	0.000129776	0.000787036	0.0646064	0	0.00349799	0	0	0	0.000973799	0	0.000459681	0	0	0	0	2.75551e-05	0.00151749	0.0862039	0.000155231	0.00418615	0	0.00071312	0	0.122789	0	0.000854317	0	0.0363944	0.00801407	0	0.0129333	0	0	1.73092e-05	0	0.0551274	0	0.0921649
25	0	0.178941	9.58384e-05	0	0	0	0	0.0162902	0.00708039	0.0137091	0.0399901	0	0	0	6.65955e-05	0	0	0	9.91635e-05	6.6932e-05	0	0.0411603	0	0	0	0	0.0570651	0	0	0	0.0581453	0.0995644	0.0748186	0	0.00543631	0.0023779	0.00986772	5.36749e-05	0	0	1.86894e-05	0.033171	0.00127569	0.000335227	0.000610663	0	0.00117662	0.0768213	0.207379
26	0	0.105103	0.000637998	0	0	0	0	0.00968695	0	0.00560499	0.0214616	0	0	0	0.0132296	0.0481457	0	0	3.62243e-05	0.000953109	0	0	0.00161929	0	2.18099e-05	0.000658374	0	0	0	0.00421301	0.0726633	0.13134	0.068856	0	0.0011697	0.00908773	0.0254277	0	0	0	0	0	0	7.58809e-05	0.000115465	0	0.135409	0.0304346	0.248015
27	0.0165159	0.117353	0	0	0	0	0.000635405	0	0	0.00284553	0.00535433	0.033184	0.00309762	0.000414995	0.000174966	0.00596825	0	0.000126561	2.53205e-05	2.08624e-05	0	0.00882799	0.000136567	0	8.38804e-05	0	0	0	0	0.0420401	0.176182	0.145184	0.0582663	1.12534e-05	0	0	0.00371686	0	0.000555797	0.00309018	0	0.0161131	0	0.00744449	0.000213202	0	0.112011	0.000106089	0.212853
28	0.000174098	0.131548	0.00031719	0	0	0	0.00988484	1.0634e-05	0.000296162	0.000117501	0.00095382	0.00990473	0.000105662	0	0.000974017	0.00240651	0	0	0.00148599	0.0020431	0	0.0340347	0.00491319	0	0.000391518	5.80932e-05	0.00347969	0	0	0	0.102723	0.103466	0.0459606	0	0	0.0219361	0.00586266	0	0.00978441	0.0055651	0.00128583	0.000660314	0.000822655	0.0118756	0.00220496	0	0.0961395	0.0997962	0.276762
29	5.60623e-05	0.0906969	1.21104e-05	2.76412e-05	0.0265521	0.000124898	0	0	0.016096	0.000552976	0.05345	3.59452e-05	0.000130559	2.17388e-05	0	3.8283e-05	0	0	0.0304591	0	0	0.0438482	0	0	0.000222908	0	0.0299077	0	0	0	0.0972831	0.144758	0.00644132	0	0	0.00281255	0.00871036	0.00465573	0.00120743	0.0760654	0.00173243	0.00326691	0	0.00243025	0.0166208	0	0.0893963	0.00090877	0.24068
30	0.000560895	0.117677	0.00344038	0	0.107187	0	0	0	0	0.000852768	0.00870184	0.000801121	1.04882e-05	0.0210174	0	0.0203483	0	0.00623799	0	0.0368196	0	0.00108583	0.00020198	0	0.0122665	0	0	0	0	0	0.139787	0.0783017	0.0359593	0	0	0	0.0569174	0	1.15281e-05	0	0	0.000128124	0.000321605	0.000481439	0.000196898	0	0.084258	0.00618142	0.220835
31	0.00230525	0.189813	9.88361e-05	0	0	0.0160827	0	0.000853071	0.0121778	7.50645e-05	0.0980122	0.000516209	0.000363056	0.0417118	0	0	0	0	0	0.0188856	0	0.00928573	0	0	0	0	0.000957379	0.000481743	0.0594721	0	0.0107855	0	0.00855812	0	0.0578087	0	0.0430034	6.90953e-05	0	0	0	0.00403833	0.137977	0	3.93816e-05	0	0.0168822	0	0.200015
32	0.0454647	0.0667695	0.0123424	0	0.0596307	0	0	0	0.00815343	0.0121892	0.058808	0.00092999	0.000655528	0.00389468	0	9.68923e-05	0	0.00119273	9.7032e-05	4.55305e-05	0	0.0273642	0.00152746	0	0.000134318	0	0.000401469	0.0132233	0	0.00590145	0.0550107	0.0442236	0.0174683	0	0.0664184	0	0.0399397	0	0.000269203	0.0181513	0	0.0128564	1.5133e-05	0.0515432	5.88436e-05	0	0.0878923	0.0034763	0.208535
33	2.98228e-05	0.153235	1.50456e-05	0	0.00015778	0	0.000164717	0	0.00319926	0.0134132	0.0201806	0.0130891	0.000297957	0.00367528	0.00888698	0.00108138	0	1.40348e-05	1.26217e-05	0.00118327	0	0.0270927	0	0	0	0	0.00112627	0	0	0.00449954	0.105942	0.1229	0.0376431	0	3.44394e-05	0	0.00823023	0.000444175	0.000313347	0.00904505	0.000102219	1.11178e-05	0	0.0189006	0.015322	0	0.16291	0.0305184	0.218247
34	1.38361e-05	0.0506942	0.00804744	0	0	0	0.00077291	0	0	0.00754344	0.0219809	0.0180511	0.0390178	0	0.00322951	0.00231855	0	0	2.30584e-05	1.31277e-05	0	0.0198607	0	0	0	0	0.000416914	0	0	7.51309e-05	0.112081	0.124661	0.0411674	0	0.0244653	1.19391e-05	0.000535515	0	0	0.0200017	0.000332457	0.00377338	0.000282787	0.0168379	0	1.85518e-05	0.197352	0.0134112	0.236227
35	4.04293e-05	0.141444	0	0	0	0	0.00021078	4.73096e-05	0.0107979	0.000823753	0.0101537	0.0112941	0	0.000724778	0.00072294	0.0432656	0	0	0.0246376	0	0	0.00453247	9.80735e-05	0	0	1.16001e-05	0.000204352	0	1.20149e-05	0.0445489	0.0692805	0.122837	0.0408544	0	0.0217292	0	0.000307309	0.00904685	0.0205571	0.0227402	0.00419041	3.90838e-05	0	0	0	0.00069117	0.0992059	0.0503919	0.202232
36	0	0.217952	0.000184312	0	0.000836441	0.00642446	0	0.0558219	0	0.000923777	0.172322	9.43989e-05	0	0	0	0.000386452	0	0	0	0	0	0	0	0	0	0.000360424	0	0.000962927	0.0988705	0	0	3.05152e-05	0	0	0.0270651	0	0.0240289	0	0	0.0272559	0	5.07601e-05	0	0.000243022	0.0316792	0	0	0	0.250848
37	0.012302	0.0792838	0	0	0	0	0	0	0.00147153	0.000945571	0.0153586	0.00212184	0	7.3775e-05	0	0.0575045	0	6.45127e-05	0.000439061	2.92686e-05	0.00771333	0	7.14208e-05	0	0	0	0.0145298	0	0	0	0.103323	0.14955	0.074703	0	0.013023	0	0.00280683	0.000728476	0	0.0231833	0	0	0	0.0279302	1.7107e-05	0.000772925	0.125677	0.0543323	0.214419
38	0.0138648	0.115212	0.000929792	5.45494e-05	3.99319e-05	0.0750231	0	0.0105592	0.0014531	0	0.178787	0	0.000432023	0.105991	0.000644808	0.000508896	0	0	0	0.00423142	0	0.00738615	0	1.72428e-05	0	0	0.0026186	8.67989e-05	0.0203566	0	0.000606828	1.84534e-05	0.0280586	0	0.0403821	0	0.0391511	5.17545e-05	0.00157816	0.00120339	2.93698e-05	0.00254117	0.0183585	0.011767	0.000353188	0	0.0465057	0	0.181241
39	0.0135453	0.0854411	0.0123509	0	0	0	0	0	0.00539843	0	0	0.0258955	4.9697e-05	1.09746e-05	0.00502945	0.041446	0	0	0.000134238	2.69616e-05	0.000163187	0.0158965	0	0	0	0	0.0130261	0	0	0.0424823	0.0398663	0.120782	0.00134507	0	0.00673667	0	0.001328	0	0	0.0148315	0.00120153	0	0	0.00997612	0.0537144	0	0.127289	0.0733293	0.266693
40	0.00238265	0.111152	0.00140188	0	0	0	0	0.000479252	0.00321215	4.62218e-05	0.0042062	0.0379812	0	0	0	0.0304815	0	0	0.000103008	1.04889e-05	0	0.0180969	0	0	0	0	0.00452656	0	0	0.0253568	0.0947545	0.186932	0.00786047	0	0.0034383	0	0.0751596	0.00100015	0	0.0189782	0	0.0239821	0	0.000116539	0.00158198	0	0.0801991	0.023331	0.228828
41	0.00073276	0.0482802	0.0177043	0	0	0	0	0.000786908	0.0282876	0.00780162	0	0	0.00642505	0.00302912	0	0.00391488	0	0.00984406	0.000290727	0.0363905	0	0.000670591	0.0336829	0	4.39762e-05	0	0.000274815	0.0131154	0	0.0360639	0.143366	0.05613	0.0586401	0	0.00632326	0.0160908	0.0735938	0	0	0.0107511	3.48198e-05	0.000676329	0.00040816	0.0389248	0	0	0.0695622	0.014784	0.233822
42	0.00184928	0.139487	1.18922e-05	0	0.000118438	0	0	0	0.0395456	0	0.0444363	0.000373446	0.00151845	0	0	0.000115577	0	0.000104984	0	0	0	0	0	0	0.000288078	0	5.03775e-05	1.77483e-05	0	0.00017069	0.0986946	0.080597	0.0230442	0	0.0695153	4.06533e-05	0.000783541	0	0	0.0485171	0.000478138	0	0.00292829	3.33128e-05	0.0357994	0	0.108511	0.0656952	0.18464
43	0.00135556	0.137889	0	0	0.01196	0.0476823	0	0.0206162	0	0.000421488	0.177415	0	0	0.00925062	0	1.16689e-05	0	0	0	0.0289185	0	0	0	0	0	0	0	0.00349385	0.0525716	0	0	0	0.0134121	0	0.0712383	0	0.00124255	3.15885e-05	3.51448e-05	0.0282869	1.06499e-05	0.000123573	0.0192098	0.0316519	0.0371039	0	0.000171749	0	0.201064
44	0.0237038	0.18661	0.00737716	0	1.93676e-05	0	0	0.00017609	0.0394805	5.72592e-05	0.127183	0	0	0.00715195	5.14893e-05	1.59949e-05	0	0	0	8.36598e-05	0	0.000981961	0	0	0	0.000141933	1.05508e-05	0	0.0963541	0	0.0118981	0	0.0098056	0	0.0429981	0	0.000109728	0	2.96801e-05	0.0208535	0	0	0.0373071	0.00107659	0.000322065	0	0.0416087	0	0.207137
45	0	0.147054	0.00781888	0	0	0	0	0.0177861	0.0025407	0	0.0451275	0	0	0.000102864	0	0.0127019	0	0	0	0.00307226	0.000600701	0	0.0245721	0	0.000312862	0.000307504	0.0855301	0	3.75191e-05	0	0.0720935	0.082474	0.0309416	0	0.00068313	0.0257311	8.85222e-05	1.6665e-05	0	0.000108458	0.000426454	0.0207245	0.000199572	0.00136848	0.0143524	0	0.0205494	0.000956678	0.307299
46	2.83905e-05	0.134604	0.0378368	0	0	0	0	3.44986e-05	0.0456952	0.00152152	0.0774962	0.0112325	0.000205369	0	0	0.000207332	0	0.0134915	0.0177189	0	0	0.0485589	0	0.00132208	3.20583e-05	0.00646421	0.0231336	0	0	0.0591487	0.0638594	0.00545585	0.0460517	0	0.000203663	0.0109134	0.0143741	0	0	0.0203772	0.00233245	0	0.0013517	0.00182237	0	7.57864e-05	0.0681393	0.0436122	0.174322
47	2.09049e-05	0.12729	0.0129264	0	0	0.0163326	0	0	9.7989e-05	0	0.000306496	0.022755	3.84897e-05	0	1.69539e-05	0.0118622	0	0	0	0.0052326	0	0.00294624	0.0109865	0	0	2.37334e-05	0.00167649	0	0.00315235	0.00200159	0.0796227	0.099858	0.00222929	0	0.0396714	0.000424655	0.000262568	0.00134036	0	0.0268937	0.000866473	0.00663301	1.67675e-05	0.022516	0.000267985	4.44792e-05	0.165278	0.0931323	0.231105
48	0	0.114479	0.0020437	0	0	0	0.0110545	0	8.43574e-05	0	0.0206469	0	8.81301e-05	0.000402425	0.0385589	0.00263082	0	0	0.000153783	0.000221547	0	0	0	0	0	0	0.000464266	0	0	0.00031691	0.106114	0.208702	0.0437234	0	0.000262494	0.000602449	1.07891e-05	8.05688e-05	0	0.0434126	0	0.00016874	0	0.000102589	0.000666399	0	0.138324	0.000756958	0.264853
49	0	0.125403	0.00024577	0	0	0	0	0.000972793	0.0649894	0.0482813	0.0149343	0	0	0.00390602	0	0.0783974	0	0	4.7758e-05	0.0481746	0	0	0.0188536	0	7.1021e-05	0	0.0416006	0.00372757	0	0.00426242	0.09273	0	0.0517555	0	0.0263903	0	0.0204522	1.2946e-05	0	5.06895e-05	0.000603229	0.0159158	0.0432027	0.00204881	4.19606e-05	1.101e-05	0.0348051	0.000931559	0.222237
50	0.0272837	0.0637372	0.0193866	0	0	0	1.43932e-05	0	0	0	0.000870101	0.00802242	0	0	0	0.011894	0	0	0	0.000171564	0	0	0	0	0	9.19933e-05	0	0	0	1.95775e-05	0.156551	0.154031	0.0467431	0	3.19846e-05	0	0.00538483	0	0	0.0297173	0	0	0	0.0005413	0.00142025	0	0.154633	0.107014	0.206387
51	0.0157494	0.0935981	0.00152626	0	0.000852712	0	0	2.5104e-05	4.68414e-05	7.66761e-05	0	0.000987472	0.000139679	0.0313502	0	0.00367898	0	0.0129776	0.00193271	0.0585162	0	0	0.0319583	0	0	1.90553e-05	0	0.000246149	2.5396e-05	0.031175	0.139978	0.0656341	0.0179947	0	0.0258064	0	0.0776661	0	0	3.67736e-05	0	0.0147948	5.77183e-05	0.0145468	1.9085e-05	0	0.113349	0.00173274	0.200005
52	0.00712702	0.159103	0.000374343	0	0.0128632	0	0	0	0.0211299	0.00438574	0.0607968	0.000326335	0.000427173	0.00011967	0	0.00113473	0	0	0.000135715	1.22722e-05	0	0.000154196	0	0	1.67348e-05	0	0.000843182	0	0	0.0217251	0.110096	0.072448	0.0791632	0	0.0152002	0	0.0176891	0	0	0.0158436	0.00179335	0.0021208	0	0.000448652	5.3403e-05	0	0.0780239	0.0612915	0.202563
53	0.000270237	0.0582355	0.0148776	0	0	0	0	0	0.0332876	6.4517e-05	0.0458185	0.000181806	0.00495609	0.0233221	0	0	0	1.74086e-05	0.000165014	0	0	0.00297981	0	0.000527447	0	0	0.0309875	2.05645e-05	0.000129138	0.00120866	0.123346	0.0481481	0.00150742	0	0.0797071	0.00228756	0.0465216	0	1.87919e-05	0.0307863	0	0.0160758	9.49078e-05	0	0.0271164	0	0.0241647	0.132917	0.205405
54	0.00123972	0.0949005	1.07814e-05	0	0.00116341	0	0	0.00020853	0.0207584	0.0188725	0.0365114	0.000452725	0.000475183	0.00324342	0	0.0171578	0	0.0219101	0.00566508	0.0606692	0	1.79275e-05	0	0	0.000303646	0	7.31307e-05	0.0945172	0.0186019	2.26392e-05	0.0712604	0.0321659	0.0460546	0	0.0208098	0.00888657	0.081291	1.05851e-05	0	0.0117451	0	0.0454151	6.94752e-05	0.0418983	0	0	0.0807019	0	0.104357
55	0.0181779	0.0513052	0.0327043	0	0.00131841	0	0	0.000171777	0.00482425	0.0313008	0	0.00733914	2.90136e-05	0.0430221	2.47894e-05	0.0495348	0	0	0.0282934	0.03203	0	0	3.98009e-05	0	0	0	9.06898e-05	0	0.000614494	0.0263235	0.150621	0.045944	0.0186239	0	0.000318632	0	0.0929167	0.000230361	0.00948911	0.00676086	0.000543384	0.000723471	0.00966809	0.036663	0.00496236	0	0.0677673	0.0254666	0.169163
56	0	0.154517	0.00344552	0	0	0	0.000173089	0.0170067	0.000630682	0.000123528	0.0121722	7.52568e-05	4.12045e-05	0	0	0.0348115	0	0	0.00931634	3.12595e-05	0	0	0.000399332	0	0	0	0.034948	0	0	0.00468806	0.0347746	0.0867927	0.00538147	0	0.0397163	0.000379157	4.47818e-05	0	0	0.0379962	5.09917e-05	0.0151132	0.000855583	0.0169312	0.0335684	0	0.160946	0.0418757	0.237099
57	0.000209908	0.213092	0.00310214	0	0	0.00804263	0	0.000174255	1.58727e-05	9.34664e-05	0.148839	4.08935e-05	0	0.0969192	0	0.000564905	0	0	0	0.000705745	0	0	0	0	0	0	6.93231e-05	4.28039e-05	0.0831166	0	0	0	0.000680937	0	0.105798	0	0.00137365	0	0.000160231	0.0163026	0	0.000451933	3.2125e-05	0	0	0	0.0348754	0	0.199075
58	5.83327e-05	0.142178	0	0	0.00202721	0	0	0	0.0165956	0.000440847	0.0141515	0.00138973	0	0.0600312	0	0.00554586	0	0.000353293	0.0261309	0.0124319	3.4427e-05	0.000124533	0.0365008	0	0	1.08154e-05	0.00478811	0.0080591	0	0.0478292	0.123145	0.124857	0.0406577	0	0	0	0.0222128	0.0229643	0.000416217	0	0.00131645	0.000435727	0.00387682	0.00190722	0	3.43384e-05	0.09142	0.000626701	0.158823
59	0.046337	0.0950259	0	0	0.113247	0	0	0	0	0	0.0502385	0	0	0.00235332	0	9.33143e-05	0	0	3.94134e-05	1.94889e-05	0	0	0	0	0	0	0	0.194396	0.037215	0	0	0	0.00435854	0	0.0225881	0	0.000529282	0	0	0.0429351	0	0	0.000811173	0.0422879	6.61344e-05	0	0.0441553	0	0.153769
60	0	0.106893	0.0169775	0.000745718	2.11267e-05	0.00035273	0	0.0285245	0.000889275	0.000116671	0.0410554	0	0	0	1.585e-05	0.000341241	0	0	0	0.0197957	0	0.0106018	2.77673e-05	0	0.0201946	0.000159404	0.0552648	0.0172736	0	0.0282196	0.15124	0.038148	0.0201883	0	0.00352489	0.00957687	0.000346568	1.22758e-05	0	0.0144086	8.30406e-05	0.00215256	0	1.49847e-05	0.000652892	0	0.0690278	0.00231115	0.2574
61	0.0612472	0.124526	0	0	0.0145318	0	0	0	0	0.0593607	0.0909718	0	0	0.00924908	3.1965e-05	0.151447	0	0	0	0.00750905	0	0.00219553	0	0	0	0	0	0.000175376	0.00686163	0	9.38586e-05	1.33132e-05	0.0301663	0	0	0	0.000261884	1.20322e-05	0	0.000139329	0	8.20414e-05	0	0.000139627	0	0	0.0793064	0	0.140127
62	1.1595e-05	0.0680032	0	0	0	0	0	0	1.84752e-05	0.0043191	1.40905e-05	0.000635326	0.00193296	0	0.0289437	0.0802211	0	0	2.85934e-05	0	2.153e-05	0.0124567	9.83834e-05	0	1.44587e-05	0	0	0	0	0	0.103	0.196097	0.0554804	0	0.000163805	0	1.15956e-05	9.19122e-05	0	0.0483961	0	2.53787e-05	0	0.00620603	0	0	0.112146	0.0636901	0.209116
63	0.000136673	0.0947903	1.17402e-05	0	0	0	8.07007e-05	0	0.000235183	7.14684e-05	0.00595758	0	2.09218e-05	0	0	0.0242445	0	0	0	0.000587599	0	0.0137936	0	0	0	0	0.022858	0	0	0.0322837	0.16579	0.0512356	0.0276832	0	1.47194e-05	3.77284e-05	0.0565852	0	3.70993e-05	0.0118669	0.0184231	0	0	0	0.0138086	0	0.138625	0	0.249878
64	0	0.127183	0.000810108	0	0	0	0.00388455	2.43737e-05	0.00382742	0	0	0	0.000216696	0.000217793	0.0144675	0.0067676	0	2.89587e-05	0.000759148	0.0108559	0	0.0417528	0	0	0	0	1.44662e-05	0	0	0	0.113143	0.150033	0.0687312	0	0.00108469	0	5.26025e-05	0	0	0.0239739	0	0.000155775	0	0.0249781	0.00271198	0	0.0891396	0.0319562	0.253443
65	0.000426235	0.183081	0	0	0	0	0	0	0.00518817	0.000162632	0.0479831	0.0280641	0.00730107	1.10865e-05	0	0	0	0	2.30906e-05	0.000204469	0	0.00152662	2.80834e-05	0	0	0	0.000488552	0	0	0.0011934	0.135914	0.143929	5.43973e-05	0	0.00578802	3.40433e-05	0.000159127	0	0	0.00175369	0.00012284	0.00943142	0	0.011416	0	0.000367908	0.148985	0.0356872	0.183802
66	0	0.0981295	0	0	0	0	0.00070342	0	0.00949417	8.39037e-05	0.0327144	0.0267745	0.000661035	0.000249258	0.00384191	0.00891285	0	0	3.35073e-05	0	0.000131177	0	1.50381e-05	0	0	0	0.00295208	0	0	0.031085	0.100224	0.0833285	0.0375591	0	9.4797e-05	0	1.87764e-05	0	0	0.0391714	0	0.000943163	0	0.087979	0.000301856	0	0.137646	0.0545248	0.231656
67	1.62913e-05	0.0917441	0.0230063	0	0	0	0	0.0182506	0.0010805	0	0.0282903	0	0.0020601	0	0	1.49509e-05	0	0.000102972	0.0031018	0.000201148	0	0.0240895	0	0	0	0	0.0192157	0	0	0.000120005	0.0684556	0.154042	0.000333599	0	0.0126188	0.00076611	0.0087801	0	0	0.0622772	0	0.0402101	0	0.00897818	0.0562938	0	0.155352	0.0330896	0.158817
68	0.00564423	0.0769989	0.00557446	0	0.0220165	0	0	7.86844e-05	0.0204925	0.0738122	0.0515002	0	0.00413566	0.0367173	0.000356708	0.0282945	0	0	4.94461e-05	0	0	0	0	0	0	0	0	0.000206289	0.00203753	0.0513916	0.0828775	0.0422063	0.056283	0	0.0034363	0	0.000202534	1.99549e-05	0.000788379	0.00169597	2.17721e-05	0.0111081	0.0146506	0.0426868	0.0121059	0	0.0691552	0.0204175	0.203129
69	4.36092e-05	0.0304005	0.0224607	0	0	0	0	0.000211344	0.0193896	0.000249271	0.0169033	0.00383752	0.00712215	0.00486961	0	0.0588929	0	0	0	0.0236712	0	0.00147926	0.0187213	0	0	0	0	0	0	0.0139024	0.146427	0.0940106	0.035528	0	0.0533541	0	0.0458753	0.000110623	1.60386e-05	7.55241e-05	0.0290393	0	7.43704e-05	0.0272802	0.000582385	0.000324862	0.0735464	0.045759	0.199718
70	0.000434127	0.0621741	0.00142822	0	0	0	0	0.000976385	0.0298578	0.0199004	0.0500109	0	0	0.0265303	0	0.0249843	0	2.11718e-05	0.0273907	0.0426458	0	0.00795079	0.032674	0	0	5.73726e-05	0.0166352	0	0	0.000900428	0.0555969	0.109283	0.00217845	0	0.00519065	0.00692216	0.058455	0.014943	0	0.0256529	0.00373765	0.00867161	0	0.00122927	0	0	0.120704	0.00183385	0.205958
71	0.00236153	0.0969431	0.0127204	0	0	0	0.00526608	0	0.0145324	5.12303e-05	0.0287776	6.17062e-05	0	0	0	0.0848944	0	0	0.000408065	0	0	0.0220027	1.48866e-05	0	0.000973824	0	0.00532759	0	0	0.000208041	0.0623377	0.162872	0.0576135	0	0.000185523	0	0.000475479	1.39591e-05	2.78297e-05	0.0344222	0.0124554	3.31936e-05	5.39424e-05	0.017504	0.00706601	0.00185985	0.117488	0.0379158	0.190218
72	0	0.117337	0.0366957	0	0	0	0	9.35936e-05	0.0436094	0.0317824	0.0558594	0	0	0.00216465	0.000546336	0.0057111	0	0	5.2835e-05	5.28125e-05	0	0.0136025	0.00151711	0	1.00318e-05	0	0.015302	0	1.64613e-05	0.0385043	0.127094	0.00833646	0.0238128	0	0	1.6804e-05	0.00038085	0	0	0.0268284	0	0.0269192	2.05178e-05	0	0.0470106	0	0.11059	0.0100703	0.197922
73	0.00276006	0.108629	3.04037e-05	0	0	0	0	0	0.000241651	0	0	0.0228422	0.011451	0.000710312	0.00430068	0.0211116	0	0	1.47887e-05	0.0115156	0	0.00656008	0	0	0	0	0	0	0	0.0533095	0.0727044	0.200099	0.0113366	0	0.027191	0	0.000815496	0.000364949	1.11463e-05	0.0343597	7.70668e-05	0	0	0.00249242	0	0.000118999	0.0934189	0.0730422	0.2403
74	2.87064e-05	0.144444	0	0	0	0.0189686	0	1.54363e-05	0	0	0.183265	0	0.000169685	0.0746142	6.05241e-05	0	0	0	0	1.4621e-05	0	0	0	1.18843e-05	0	0	0	0.000115442	0.0526857	0	0.000104567	1.23373e-05	0	0	0.22955	0	1.12356e-05	0.00241731	0	0.00842026	7.35035e-05	0	0.000741363	0.00246513	0.000286046	0	0.0394887	2.63572e-05	0.179012
75	0.00027595	0.125952	0.00104988	0	1.61126e-05	0	0	0	0.000559791	0.0103486	0.016933	0.00139571	5.01701e-05	0	0	0.000495676	0	0	0	1.34142e-05	0	0	0	0	0	0	0.000166762	0	0	0.000231343	0.123986	0.0407085	0.00834957	0	0.0110241	0.000748953	0.0555059	0.00424269	0	6.26072e-05	0.000265307	0.0646098	0	0.0505311	0	0	0.125835	0.0854675	0.229265
76	0.000188538	0.231955	0.000219123	0	0.00263702	4.51531e-05	0	2.53246e-05	0	1.41605e-05	0.149252	0	0.000445592	0.0676886	0	0.00917564	0	0	0	0	0	0	0	0	0	0	0.00130315	0	0.0984514	0	0.00207129	0	0.000118649	0	0.00496632	0	5.41377e-05	0	0	0.049959	0	4.03054e-05	0.000311868	0	0.0309476	0	0.00345447	0	0.237821
77	0	0.149778	0.0571482	0	0	0	0	0	0.00642909	0	0.0317461	4.80692e-05	1.51804e-05	0.000490963	0	0	0	0	0.000101657	0.000156003	0	0	0.00300839	0	0.000263061	0	0.00436602	0	0	0.00716797	0.00678291	0.0943775	0.045315	0	0	0	0	0	0	0.0223673	3.57927e-05	0.0715417	0	0	0	0	0.124917	0.0273544	0.296452
78	0	0.100376	0	0	0.00263972	0	0	1.18238e-05	0.000651445	0.00452228	0.0510386	2.86964e-05	0	0	0.00249729	0.00938288	0	0	6.17893e-05	0.000135845	3.56489e-05	0.000206457	0	0	0	0	0.0447765	0	0	0.0579886	0.105732	0.0280977	0.00498411	0	0.031495	4.95194e-05	0	0	0	0.0430485	0	0.0603143	1.42105e-05	0.00257359	5.10273e-05	0	0.0850203	0.0481485	0.2555
79	0.00679714	0.0775475	0.0305604	0	0	0	0	0	0	0.000726007	0.0228248	0	0.00104897	1.93485e-05	0.00992674	0.0159412	0	0	0	0.0357768	0	0.000322313	0.0528627	0	0	0	0	0	0	0.0240658	0.096231	0.149379	0.0322291	0	0.000270258	0	0.00124816	0	0	0.0205092	0	0	0	0.00134134	0.00781954	0	0.102822	0.0216657	0.259269
80	0.0169698	0.171265	0.000306289	0	0	5.95131e-05	0	3.32754e-05	0.00676227	0	0.133644	0	0.00102519	0.0121286	0	0.000148691	0	0	4.40556e-05	0	0	0	0	0	0	0	0.00330613	0.00262857	0.0546487	0.00326981	0.00184009	0	0.0496087	0	0.0901272	0	0.0333068	0	0	0.009901	0	4.2976e-05	0.00528176	0.000613924	0.00017619	0	0.0935942	0	0.167229
81	0.0149287	0.151746	0.00314305	0	0.00253907	0	0	3.88089e-05	0.00850593	0.044475	0.037428	1.40361e-05	1.02165e-05	0.00426025	0	0.00149407	0	0.0320679	0.0100229	0.0326716	0	0.0179579	0	7.25129e-05	0	0	0.00444834	0.0674125	0.012509	0.000116935	0.133112	0.0155169	0.0502858	0	0.00125344	0	0.0493187	0.000146252	0	0.00020294	0	0.0102948	0	0.056949	0	0	0.0357567	0.018647	0.1075
82	0.000976923	0.119534	0	0	0.0126995	0	0	0	0.0109195	0.0662381	0.0658601	0	0.00201635	0.00510255	0	0.00624033	0	0	0.000242275	0.0017961	0	0.000204337	0.000334152	0	0.00393342	0.000394166	0.0449932	0	0	0.00472988	0.183594	0.0544713	0.000107623	0	0	0.000836879	0.0707736	0.000763407	0	3.55501e-05	0	0	0	0	0	0.000679252	0.0818006	0.0232751	0.19386
83	0.0197223	0.147215	0.00331604	0	0.00701283	0	0	0	0.0437616	0.0467206	0.0105554	0.0123614	0.000638838	0.0330126	0	0.013908	0	0.00619423	0.00604526	0.0585786	0	0.0368232	0.0437043	0	0.00129357	5.797e-05	0.000116092	0	0	0.0309559	0.0569202	0.0425443	0.00836725	0	2.04133e-05	0	0.105566	0	0.00109765	0.000133824	0	0	4.59614e-05	0.00799253	8.73554e-05	0.00024682	0.032145	0.0311952	0.145131
84	0.00307235	0.183384	0.0244914	0	0	0	0	0.000336511	0.0100284	0.00321662	0.0802949	0	0.000157128	0.00186417	0	0.000156313	0	0	6.89634e-05	2.11316e-05	0	0.00792111	0	0	0	0	3.77748e-05	0	0	0.000292001	0.117388	0.118578	0.0644075	0	0.000458148	0.00771056	0.00945735	0	0	0.0419052	0.000126775	0.00422198	0.000637439	0.0176826	0	0	0.080271	0.00676794	0.183808
85	0	0.134943	0.00010496	0	0	0	0	7.15271e-05	0	0	0.0672909	0.0159719	0	0.0169488	0	0	0	2.04932e-05	0	0.001466	0	0.0264606	0	0	0	0	0.000457685	0.0520923	0.000950826	1.11119e-05	0.0442092	0.0324905	0.0339896	0	0.0178713	0.000360384	0.0521439	0.0318055	0	8.4719e-05	3.38764e-05	0.10763	0	0.00670711	0.00638412	0	0.0756369	0.0112841	0.183848
86	2.57982e-05	0.0947936	0.0144242	0	5.78545e-05	0	0.000420481	2.45678e-05	0.00966893	4.37675e-05	0.0494346	0.000208666	0.000123012	0.0011681	6.78925e-05	0.00296265	0	0	0	0	0	0.00893693	0	0	0	0	0.0492396	7.09919e-05	0	0.0123918	0.109777	0.0892883	0.0319894	0	0	0	5.52324e-05	0	0	0.0198997	1.16802e-05	2.68543e-05	4.55297e-05	1.38482e-05	0	0	0.124352	0.0793156	0.230086
87	0.00221925	0.0732474	0.0291687	0	0.00157072	0	0	0	1.71963e-05	9.19132e-05	0	9.86075e-05	2.28835e-05	0.0169192	0	0.0103198	0	0.00834742	0.00801318	0.00181569	0.00942582	0.0259184	0	0	4.56037e-05	0	0	0	0	0.00303221	0.139606	0.14115	0.0794811	0	0.0127322	0	0.0126585	0.000294977	0	0	0.000784792	0.0202212	0.000685964	0.0255056	0	0	0.102573	9.13293e-05	0.212228
88	0.00373992	0.102153	0.000100281	0	0	0	0	0	0	0.00375701	0.00309673	0.000967315	0.00163969	0	0.02406	3.25627e-05	0	0	0	0.0128475	0.0215022	0.00640187	0	0	0	0	0	0	0	0.0472125	0.0375623	0.155926	0.0774021	0	0.00132544	0	0.000542167	0	0.001212	0.00667041	0	0	0	1.69721e-05	2.69005e-05	0	0.148683	0.0508065	0.24877
89	0	0.115544	0.0311068	0	0	0.00204582	0	0.000681305	0	2.20395e-05	0	0.00810448	0.00360006	0	1.22074e-05	0.0613748	0	0	0.0187971	2.00061e-05	0	0	0	0	5.45994e-05	1.22531e-05	0.00758336	0	0	0.00833512	0.109535	0.171928	0.046181	0	0.00401748	0.000738007	0.000544693	0.000475406	0.00370841	0.0636666	0	0.000335543	0	9.62087e-05	0.000678637	0.00413078	0.0268035	0.0426092	0.233599
90	0	0.112684	0.00873939	0	8.75282e-05	0	0	0.000533592	0	0	3.81732e-05	1.89582e-05	3.17193e-05	0	0	0.00639007	0	0	7.37393e-05	0.00277004	4.63172e-05	0.00523363	3.87831e-05	0	0.00410833	0	0	0	0	0.00105675	0.137344	0.0918085	0.0929475	0	0	0	0.00609827	0	0	0.0159393	2.745e-05	0	0	0.00284921	2.4951e-05	6.68672e-05	0.143725	0.0593397	0.278188
91	0.000341946	0.103673	0.000295236	0	5.26747e-05	0	0	0	2.48663e-05	0.110082	0.0256801	0.0241916	0.000145932	0.0143532	0	0.00833136	0	0.0132824	0.000668088	0.00352838	0	0.021564	0.0138133	0	0	0	1.6751e-05	0.0334722	0.000614577	0.0263704	0.133272	0.0907484	0.0350106	0	1.15569e-05	0	0.0130592	0	0	1.20506e-05	2.52961e-05	0.00164427	0	0.000748599	0.00344512	0	0.0619881	0	0.195077
92	0.00162841	0.066849	0.00296179	0	0.000707666	0	0.000332215	0	0	0.00644276	0.0464699	0	9.01124e-05	1.35218e-05	2.19204e-05	0.00128758	0	0	0	0.00166827	0	0.000302898	0.00537894	0	0	0	0	0	0	0.0297992	0.108936	0.136844	0.083212	0	0	0	4.67649e-05	0	0.0015637	0.0403007	1.43922e-05	0	0	0.00481553	2.14827e-05	0	0.199166	0.0247813	0.181246
93	0	0.102652	0.0121758	0	0	0.000300989	0	0.0171264	0.00115963	0.00247533	0.0781343	0.00158852	5.82242e-05	2.52352e-05	0	0	0	0	0	0.0110175	0	0.0218236	0	0.000439675	0	0.000269927	0.0308739	0	0.00204765	0.00317317	0.00211562	0.0943661	0.0542276	0	0.0749873	0.0173352	0.000668586	1.09029e-05	0	0.00121754	0	0.0143887	8.12173e-05	0.0011034	2.21114e-05	0	0.0781777	0.0707775	0.222052
94	0.00848285	0.109154	0.0150568	1.87107e-05	0.0144971	4.07341e-05	0.000170053	0	0.000490858	0.00236357	0.00857699	0.000129014	2.54102e-05	0.000279679	0	0.0203327	0	0.000313641	0.00436118	9.69938e-05	0	0.0154718	0	0	0	0	0.0790297	0.0132758	0.00351196	0.0744311	0.0169835	0.0385583	0.0655443	0	0.000796193	2.08367e-05	0.010777	0	1.7597e-05	0.00167133	0	0.110636	3.4936e-05	0.00202147	0.00407259	1.77668e-05	0.119753	0.0121544	0.176808
95	0	0.141687	0.0114206	0	0	0	0	0	0	0	0.079958	0.000246801	0	0	0	0.0105502	0	0	0	0	0	0.0448014	0	0	0	0	7.65786e-05	0	0.0185715	0.00675498	9.27481e-05	0.100408	0.0354866	0	0	0	0.00339128	0	0	0.0218909	6.31363e-05	0.0431857	0	0	0.0528209	0	0.170685	0.000101156	0.214087
96	0.0070482	0.00167075	3.09921e-05	0	0.0233211	0	0	0.000345015	0.101448	0.0735776	0.00346085	3.33376e-05	2.26991e-05	0.00588005	0	0.00282761	0	0	0	0.0184767	0	0	1.65117e-05	0	1.02912e-05	2.84683e-05	0.000131613	0	5.97833e-05	0.0787875	0.05591	0.0741065	0.0219502	0	0.0284125	0	0.00878677	0.000223225	0.00211949	0	0	0.016729	0.106359	0.0519021	8.41825e-05	0	0.0666636	0.00309037	0.18547
97	2.6276e-05	0.136283	0	0	0.0296233	0	0	1.23214e-05	0.0280538	0.00152565	0.0329206	0.00624504	1.21241e-05	0.00785239	0	0.000424573	0	1.20431e-05	0.000145845	0.0421258	0	0	0	0	2.74878e-05	0	0.0200482	0.0497199	0	0.00886247	0.113772	0.0134595	0.0618298	0	0.00855209	0.000137825	0.112777	0	0	0	0	0	0	0.00967457	7.8805e-05	0	0.0127635	0.0477033	0.201322
98	0.016984	0.142697	0.00230165	0	0	0.000381714	0	0	0.0711067	0	0.0622527	0.000147259	0.0196137	0.000456423	0.000531613	1.17958e-05	0	0	1.06468e-05	0	0	0.00362568	0	0	0	3.19598e-05	0.0102212	0	0	0.0182324	0.0501901	0.136288	0.0661325	0	6.595e-05	0.000284824	0.00834007	0	0	0.0216455	0.0199752	0.00566698	0	0.0251345	0.000560237	0	0.0121567	0.0224815	0.211975
99	0.00748714	0.118706	0	0	7.60532e-05	0	0	0.000380278	0.0152405	0.00118336	0.000695611	0	1.21252e-05	0.000187277	0.000428389	0.0529497	0	0	0	0	0	1.88318e-05	0	0	0	3.33569e-05	0.0243394	0	0	0.000359818	0.0771486	0.127863	0.0889889	0	0	0	0.0495759	0	0	0.0110445	2.00338e-05	0	6.30039e-05	0.0166956	0.000102144	0	0.0837848	0.0694828	0.222465
100	0	0.0624528	0.022723	0	0.0943106	0.021083	0	0.043449	0.00665766	0.000208202	0.194076	0	0	0.00527432	0	0.000193862	0	0	0	0.00471646	0	0	0	0	0	0	0.00267816	0.00187146	0.0769849	0	0.00488796	0.0762506	0.0788467	0	0.0332343	1.82624e-05	0.0476071	0.00545435	0	0	0.000112102	0.0189614	0.0221026	0	0	0	0.0567315	0	0.00302568
[truncated: 1 more columns]

## Sheet: Supplementary Table 5
Supplementary Table 5: Selection frequencies of 196 pathways in the PID collection by PrognosiT algorithm in 100 replications on thyroid carcinoma (i.e. THCA) dataset.
Replication	PID_FANCONI_PATHWAY	PID_SMAD2_3NUCLEAR_PATHWAY	PID_FCER1_PATHWAY	PID_ENDOTHELIN_PATHWAY	PID_BCR_5PATHWAY	PID_PRL_SIGNALING_EVENTS_PATHWAY	PID_RHOA_PATHWAY	PID_ERBB4_PATHWAY	PID_AURORA_B_PATHWAY	PID_LYSOPHOSPHOLIPID_PATHWAY	PID_INSULIN_PATHWAY	PID_NOTCH_PATHWAY	PID_INTEGRIN1_PATHWAY	PID_P73PATHWAY	PID_P38_MKK3_6PATHWAY	PID_GMCSF_PATHWAY	PID_WNT_NONCANONICAL_PATHWAY	PID_NFKAPPAB_ATYPICAL_PATHWAY	PID_IL4_2PATHWAY	PID_HDAC_CLASSII_PATHWAY	PID_BETA_CATENIN_DEG_PATHWAY	PID_HDAC_CLASSIII_PATHWAY	PID_GLYPICAN_1PATHWAY	PID_TCR_PATHWAY	PID_IL27_PATHWAY	PID_NFKAPPAB_CANONICAL_PATHWAY	PID_E2F_PATHWAY	PID_ER_NONGENOMIC_PATHWAY	PID_DNA_PK_PATHWAY	PID_HIF2PATHWAY	PID_CD40_PATHWAY	PID_ATR_PATHWAY	PID_INTEGRIN_CS_PATHWAY	PID_MET_PATHWAY	PID_PTP1B_PATHWAY	PID_INTEGRIN3_PATHWAY	PID_IL12_2PATHWAY	PID_S1P_S1P3_PATHWAY	PID_LPA4_PATHWAY	PID_AR_PATHWAY	PID_NFAT_TFPATHWAY	PID_EPHB_FWD_PATHWAY	PID_AVB3_OPN_PATHWAY	PID_S1P_S1P4_PATHWAY	PID_FRA_PATHWAY	PID_MYC_ACTIV_PATHWAY	PID_ARF6_TRAFFICKING_PATHWAY	PID_RHOA_REG_PATHWAY	PID_REELIN_PATHWAY
1	1	0	0	0	0	0	0	0	0	0	0	0	0	0	0	0	0	0	0	0	0	0	0	0	0	0	0	0	0	0	0	0	0	0	0	0	0	0	0	0	1	1	0	0	1	0	0	0	0
2	0	0	0	0	0	0	0	0	0	0	0	1	0	0	0	0	0	0	0	0	0	0	0	0	0	0	0	0	0	0	0	1	0	0	0	0	0	0	0	0	0	0	0	0	1	1	0	0	1
3	1	0	0	0	0	0	0	0	1	0	0	0	0	0	0	0	0	0	0	0	0	0	1	0	0	0	0	0	0	0	0	0	0	0	0	0	0	0	0	0	1	1	0	0	1	0	0	0	1
4	0	0	0	0	0	1	0	0	1	0	0	0	0	0	0	0	0	0	0	0	0	0	0	0	0	0	0	0	0	0	0	0	0	0	0	0	0	0	0	0	1	0	0	0	1	0	0	0	1
5	0	0	0	0	0	0	0	0	0	0	0	0	0	0	0	0	0	0	0	0	0	0	0	0	0	0	0	0	0	0	0	1	0	0	0	0	0	0	0	0	1	0	0	0	1	0	0	0	0
6	0	0	0	0	0	1	0	0	1	0	0	0	0	0	0	0	0	1	0	0	0	0	0	0	0	0	0	0	0	0	0	1	0	0	0	0	0	0	0	0	1	0	0	0	1	0	0	1	0
7	1	0	0	0	0	1	0	0	0	0	0	0	0	0	0	0	0	0	0	0	0	0	1	0	0	0	0	0	0	0	1	1	0	0	0	0	0	0	0	0	1	0	0	0	1	0	0	0	1
8	1	0	0	0	0	0	0	0	0	0	0	0	0	0	0	0	1	0	0	0	0	0	0	0	0	0	0	0	0	0	0	0	0	0	0	0	0	0	0	0	1	1	0	0	0	0	0	1	0
9	1	0	0	0	0	0	0	0	0	0	0	0	0	0	0	0	0	0	0	0	0	0	0	0	0	0	0	0	0	0	0	0	0	0	0	0	0	0	0	0	1	1	0	0	1	0	0	0	0
10	1	0	0	0	0	0	0	0	0	0	0	0	0	0	0	0	0	0	0	0	0	0	0	0	0	0	0	0	0	0	0	1	0	0	0	0	0	0	0	0	1	0	0	0	1	0	0	1	0
11	1	0	0	0	0	0	0	0	0	0	0	0	0	0	0	0	0	0	0	0	0	0	0	0	0	0	0	0	0	0	0	0	0	0	0	0	0	0	0	0	1	1	0	0	0	0	0	0	0
12	1	0	0	0	0	0	0	0	0	0	0	0	0	0	0	0	0	0	0	0	0	0	0	0	0	0	1	0	0	0	0	0	0	0	0	0	0	0	0	0	1	1	0	0	0	0	0	0	0
13	1	0	0	0	0	1	0	0	0	0	0	0	0	0	0	0	0	0	0	0	0	0	0	0	0	0	0	0	0	0	0	0	0	0	0	0	0	0	0	0	1	0	0	0	1	0	0	0	1
14	0	0	0	0	0	1	0	0	0	1	0	0	0	0	0	0	0	0	1	0	0	0	0	0	0	0	0	0	0	0	0	1	0	0	0	0	0	0	0	0	1	0	0	0	1	0	0	0	0
15	0	0	0	0	0	1	0	0	0	0	0	0	0	0	0	0	0	0	0	0	0	1	0	0	0	0	0	0	0	0	0	1	0	0	0	0	0	0	0	0	1	0	0	1	1	0	0	0	0
16	1	0	0	0	0	0	0	0	0	0	0	0	0	0	0	0	0	0	0	0	0	0	0	0	0	0	0	0	0	0	0	0	0	0	0	0	0	0	0	0	1	1	0	0	1	0	0	0	0
17	0	0	0	0	0	1	0	0	1	0	0	0	0	0	0	0	0	0	0	0	0	0	1	0	0	0	0	0	0	0	0	1	0	0	0	0	0	0	0	0	0	0	0	0	1	1	0	0	1
18	1	0	0	1	0	0	0	0	1	0	0	0	0	0	0	0	0	0	0	0	0	0	1	0	0	0	0	0	0	0	0	1	0	0	0	0	0	0	0	0	1	0	1	0	1	0	0	0	1
19	1	0	0	0	0	1	0	0	1	0	0	0	0	0	0	0	0	0	0	0	0	0	1	0	0	0	0	0	0	0	0	0	0	0	0	0	0	0	0	0	1	1	0	0	0	0	0	0	0
20	0	0	0	0	0	0	0	0	0	0	0	0	0	0	0	0	0	0	0	0	0	0	1	0	0	0	0	0	0	0	0	0	0	0	0	0	0	0	0	0	1	0	0	0	0	0	0	0	0
21	1	0	0	0	0	0	0	0	0	0	0	0	0	0	0	0	0	0	0	0	0	0	0	0	1	0	0	0	0	0	0	0	0	0	0	0	0	0	0	0	1	0	0	0	0	0	0	0	0
22	1	0	0	0	0	0	0	0	0	0	0	0	0	0	0	0	0	0	0	0	0	0	0	0	0	0	1	0	0	0	0	0	0	0	0	0	0	0	0	0	1	1	0	0	1	0	0	0	0
23	1	0	0	0	0	0	0	0	0	0	0	0	0	0	0	0	0	0	0	0	0	0	1	0	0	0	0	0	0	0	0	0	0	0	0	0	0	0	0	0	1	1	0	0	1	0	0	0	0
24	1	0	0	0	0	1	0	0	0	0	0	0	0	0	0	0	0	0	0	0	0	0	1	0	0	0	0	0	0	0	0	1	0	0	0	0	0	0	0	0	1	0	0	0	1	0	0	0	0
25	0	0	0	0	0	0	0	0	0	0	0	0	0	0	0	0	0	0	0	0	0	0	0	0	0	0	0	0	0	0	0	1	0	0	0	0	0	0	0	0	0	0	0	0	1	0	0	0	1
26	0	0	0	0	0	0	0	0	0	0	0	0	0	0	0	0	0	0	0	0	0	0	0	0	0	0	0	0	1	0	0	1	0	0	0	0	0	0	0	0	0	0	0	0	1	1	0	0	0
27	0	0	0	0	0	0	1	0	0	0	0	0	0	0	0	0	0	0	0	0	0	0	0	0	0	0	0	0	0	0	0	0	0	0	0	0	0	0	0	0	1	0	0	0	1	1	0	0	0
28	1	0	0	0	0	0	0	0	1	0	0	0	0	0	0	0	0	0	0	0	0	0	0	0	0	0	0	0	0	0	1	0	0	0	0	0	0	0	0	0	1	0	1	0	1	0	0	0	1
29	1	0	0	0	0	0	0	0	0	0	0	0	0	0	0	0	0	0	0	0	0	0	1	0	0	0	0	0	0	0	0	1	0	0	0	0	0	0	0	0	1	1	0	0	1	0	0	0	0
30	1	0	0	0	0	1	0	0	0	0	0	0	0	0	0	0	0	0	0	0	0	0	1	0	0	0	0	0	0	0	0	0	0	0	0	0	0	0	0	0	1	1	0	0	1	0	0	0	0
31	1	0	0	0	0	0	0	0	0	0	0	0	0	0	0	0	0	0	0	0	0	0	0	0	0	0	0	0	0	0	0	0	0	0	0	0	0	0	0	0	1	1	0	0	1	0	0	0	0
32	0	0	0	0	0	0	0	0	0	0	0	0	0	0	0	0	0	0	0	0	0	1	0	0	0	0	0	0	0	0	0	1	0	0	0	0	0	0	0	0	1	1	1	0	1	0	0	0	1
33	1	0	0	0	0	0	0	0	0	0	0	0	0	0	0	0	0	0	0	0	0	0	0	0	0	0	0	0	0	0	0	0	0	0	0	0	0	0	0	0	1	0	0	0	1	0	0	0	0
34	0	0	0	0	0	0	0	0	1	0	0	0	0	0	0	0	0	0	0	0	0	0	0	0	0	0	0	0	0	0	0	0	0	0	0	0	0	0	0	0	1	0	1	0	1	0	0	0	0
35	0	0	0	1	0	0	0	0	0	0	0	0	0	0	0	0	0	0	0	0	0	0	0	0	0	0	0	0	0	0	0	1	0	0	0	0	0	0	0	0	1	0	1	0	1	0	0	0	0
36	1	0	0	0	0	0	0	0	0	0	0	0	0	0	0	0	0	0	0	0	0	0	0	0	0	0	0	0	0	0	0	0	0	0	0	0	0	0	0	0	0	0	0	0	1	0	0	0	0
37	1	0	0	0	0	1	0	0	0	0	0	0	0	0	0	0	0	0	0	0	0	0	0	0	0	0	0	1	0	0	0	0	0	0	0	0	0	0	0	0	1	0	0	0	1	0	0	0	0
38	1	0	0	0	0	1	0	0	0	0	0	0	0	0	0	0	0	0	0	0	0	0	0	0	0	0	0	0	0	0	0	0	0	0	0	0	0	0	0	0	1	1	0	0	1	0	0	0	0
39	0	0	0	0	0	0	0	0	0	0	0	0	0	0	0	0	0	0	0	0	0	0	0	0	0	0	0	0	0	0	0	1	0	0	0	0	0	0	0	0	1	0	0	0	1	0	0	0	0
40	0	0	0	0	0	0	0	0	0	0	0	0	0	0	0	0	0	0	0	0	0	0	0	0	0	0	0	0	0	0	0	1	0	0	0	0	0	0	0	0	1	0	0	0	1	0	0	0	0
41	0	0	0	0	0	0	0	0	0	0	0	0	0	0	0	0	0	0	0	0	0	0	0	0	0	0	0	0	1	0	0	1	0	0	0	1	0	0	0	0	0	1	0	0	1	0	0	0	0
42	1	0	0	0	0	1	0	0	0	0	0	0	0	0	0	0	0	0	0	0	0	0	0	0	0	0	0	0	0	0	0	1	0	0	0	0	0	0	0	0	1	1	1	1	0	0	0	0	0
43	1	0	0	0	0	0	0	0	0	0	0	0	0	0	0	0	0	0	0	0	0	0	1	0	0	0	0	0	0	0	0	1	0	0	0	0	0	0	0	0	1	1	0	0	1	0	0	0	0
44	1	0	0	0	0	0	0	0	0	0	0	0	0	0	0	0	0	0	0	0	0	0	1	0	0	0	0	0	0	0	0	0	0	0	0	0	0	0	0	0	1	1	0	0	1	0	0	0	0
45	0	0	0	0	0	1	0	0	0	0	0	0	0	0	0	0	0	0	0	0	0	0	0	0	0	0	0	0	0	0	0	1	0	0	0	0	0	0	0	0	1	0	0	0	1	0	0	0	0
46	1	0	0	0	0	0	0	0	0	0	0	0	0	0	0	0	0	0	0	0	0	0	1	0	0	0	0	0	0	0	0	0	0	0	0	0	0	0	0	0	1	0	0	0	1	0	0	0	0
47	1	0	0	0	0	0	0	0	0	0	0	0	0	0	0	0	0	0	0	0	0	0	0	0	0	0	0	0	0	0	0	0	0	0	0	0	0	0	0	0	1	0	0	0	0	0	0	1	0
48	0	0	0	0	0	0	0	0	0	0	0	0	0	0	0	0	0	0	0	0	0	0	0	0	0	0	1	0	0	0	0	0	0	0	0	0	0	0	0	0	0	0	0	0	1	0	0	0	0
49	1	0	0	0	0	0	0	0	1	0	0	0	0	0	0	0	0	0	0	0	0	0	1	0	0	0	0	0	0	0	0	0	0	0	1	0	0	0	0	0	1	1	0	0	1	0	0	0	0
50	1	0	0	0	0	0	0	0	0	0	0	0	0	0	0	0	0	0	0	0	0	0	0	0	0	0	0	0	1	0	0	0	0	0	0	0	0	0	0	0	1	0	0	0	1	0	0	0	0
51	0	0	0	0	0	0	0	0	1	0	0	0	0	0	0	0	0	0	0	0	0	0	0	0	0	0	0	0	0	0	0	1	0	0	0	0	0	0	0	0	1	1	1	0	1	0	0	0	0
52	1	0	0	0	0	0	0	0	0	0	0	0	0	0	0	0	0	0	0	0	0	0	1	0	0	0	0	0	0	0	0	0	0	0	0	0	0	0	0	0	1	1	0	0	1	0	0	0	0
53	1	0	0	0	0	0	0	0	0	0	0	0	0	0	0	0	0	0	0	0	0	0	0	0	0	0	0	0	0	0	0	0	0	0	0	0	0	0	0	0	1	0	0	0	1	0	0	0	0
54	0	0	0	0	0	0	0	0	0	0	0	0	0	0	0	0	0	0	0	0	0	1	1	0	0	0	0	0	0	0	0	0	0	0	0	0	0	0	0	0	1	1	0	0	1	0	0	0	0
55	1	0	0	0	0	0	1	0	1	0	0	0	0	0	0	0	0	0	0	0	0	0	0	0	0	0	0	1	0	0	0	0	0	0	0	0	0	0	0	0	1	1	1	0	1	0	0	0	0
56	1	0	0	0	0	1	0	0	1	0	0	0	0	0	0	0	0	0	0	0	0	0	1	0	0	0	0	0	0	0	0	1	0	0	0	0	0	0	0	0	1	1	0	0	1	0	0	0	0
57	0	0	0	0	0	0	0	0	0	0	0	0	0	0	0	0	0	0	0	0	0	0	0	0	0	0	0	0	0	0	0	0	0	0	0	0	0	0	0	0	0	0	0	0	1	0	0	0	0
58	1	0	0	0	0	1	0	0	0	0	0	0	0	0	0	0	0	0	0	0	0	0	0	0	0	0	0	0	0	0	0	0	0	0	0	0	0	0	0	0	1	0	0	0	1	0	0	0	1
59	1	0	0	0	0	0	0	0	0	0	0	0	0	0	0	0	0	0	0	0	0	0	1	0	0	0	0	0	0	0	0	0	0	0	0	0	0	0	0	0	0	1	0	0	1	0	0	0	0
60	0	0	0	0	0	0	0	0	1	0	0	0	0	0	0	0	0	0	0	0	0	0	0	0	0	0	0	0	0	0	0	0	0	0	0	0	0	0	0	0	0	0	0	0	1	0	0	0	0
61	1	0	0	0	0	0	0	0	0	0	0	0	0	0	0	0	0	0	0	0	0	0	1	0	0	0	0	0	0	0	0	1	0	0	0	0	0	0	0	0	1	0	1	0	0	0	0	0	0
62	0	0	0	0	0	0	0	0	0	0	0	0	0	0	0	0	0	0	0	0	0	0	0	0	0	0	0	0	0	0	0	1	0	0	0	0	0	0	0	0	1	0	0	0	0	0	0	0	0
63	0	0	0	0	0	0	0	0	0	0	0	0	0	0	0	0	0	0	0	0	0	0	1	0	0	0	0	0	0	0	0	1	0	0	0	0	0	0	0	0	1	1	0	0	0	0	0	0	1
64	1	0	0	0	0	0	0	0	0	0	0	0	0	0	0	0	0	0	0	0	0	0	0	0	0	0	0	0	0	0	0	0	0	0	0	0	0	0	0	0	1	0	0	0	1	0	0	0	0
65	0	0	0	0	0	1	0	0	0	0	0	1	0	0	0	0	0	0	0	0	0	0	0	0	0	0	0	0	0	0	0	1	0	0	0	0	0	0	0	0	1	0	1	0	1	0	0	0	1
66	1	0	0	0	0	0	0	0	0	0	0	0	0	0	0	0	0	0	0	0	0	0	0	0	0	0	1	0	0	0	0	1	0	0	0	0	0	0	0	0	1	0	1	0	1	0	0	0	0
67	1	0	0	0	0	0	0	0	0	0	0	0	0	0	0	0	0	0	0	0	0	0	0	0	0	0	0	0	0	0	0	1	0	0	0	0	0	0	0	0	1	0	0	0	1	0	0	0	0
68	0	0	0	0	0	0	0	0	0	1	0	0	0	0	0	0	0	0	0	0	0	0	1	0	0	0	0	0	0	0	0	1	0	0	0	0	0	0	0	0	1	0	0	0	1	0	0	0	1
69	1	0	0	1	0	0	0	0	1	0	0	0	0	0	0	0	0	0	0	0	0	0	0	0	0	0	0	0	0	0	0	1	0	0	0	0	0	0	0	0	1	1	0	0	1	0	0	0	0
70	1	0	0	0	0	0	0	0	0	0	0	0	0	0	0	0	0	0	0	0	0	0	1	0	0	0	0	0	0	0	0	0	0	0	0	0	0	0	0	0	1	0	0	0	0	0	0	0	1
71	1	0	0	0	0	0	0	0	0	0	0	0	0	0	0	0	0	0	0	0	0	0	0	0	0	0	0	0	0	0	0	0	0	0	0	0	0	0	0	0	1	1	0	0	1	0	0	0	0
72	1	0	0	0	0	0	0	0	0	0	0	0	0	0	0	0	0	0	0	0	0	0	0	0	0	0	0	0	0	0	0	0	0	0	0	0	0	0	0	0	1	1	0	0	0	0	0	0	0
73	1	0	0	0	0	0	0	0	0	0	0	0	0	0	0	0	0	0	0	0	0	0	0	0	0	0	1	0	0	0	0	0	0	0	0	0	0	0	0	0	1	0	0	0	1	0	0	0	0
74	0	0	0	0	0	0	0	0	0	0	0	0	0	0	0	0	0	1	0	0	0	0	1	0	0	0	0	0	0	0	0	1	0	0	0	0	0	0	0	0	1	1	0	0	1	0	0	0	0
75	0	0	0	0	0	0	0	0	1	0	0	0	0	0	0	0	0	0	0	0	0	0	0	0	0	0	0	0	0	0	0	1	0	0	0	0	0	0	0	0	1	0	1	0	1	0	0	0	0
76	1	0	0	0	0	0	0	0	0	0	0	0	0	0	0	0	0	0	0	0	0	0	1	0	0	0	0	0	0	0	0	0	0	0	0	1	0	0	0	0	1	0	0	0	1	0	0	0	0
77	0	0	0	0	0	0	1	0	1	0	0	0	0	0	0	0	0	0	0	0	0	0	0	0	0	0	0	0	0	0	0	1	0	0	0	0	0	0	0	0	1	0	0	0	1	0	0	0	0
78	1	0	0	0	0	0	0	0	0	0	0	0	0	0	0	0	0	0	0	0	0	0	1	0	0	0	0	0	0	0	0	1	0	0	0	0	0	0	0	0	1	1	0	0	1	0	0	0	0
79	1	0	0	0	0	0	0	0	0	0	0	0	0	0	0	0	0	0	0	0	0	0	0	0	0	0	0	0	0	0	0	1	0	0	0	0	0	0	0	0	1	0	0	0	1	0	0	0	0
80	1	0	0	0	0	0	0	0	0	0	0	0	0	0	0	0	0	0	0	0	0	1	1	0	0	0	0	0	0	0	0	0	0	0	0	0	0	0	0	0	1	1	0	0	0	0	0	0	0
81	1	0	0	0	0	0	0	0	0	0	0	0	0	0	0	0	0	0	0	0	0	0	0	0	0	0	0	0	1	0	0	0	0	0	0	0	0	0	0	0	1	1	0	0	1	0	0	0	0
82	1	0	0	0	0	0	0	0	0	0	0	0	0	0	0	0	0	0	0	0	0	0	0	0	0	0	0	0	0	0	0	1	0	0	0	0	0	0	0	0	1	0	0	0	1	0	0	0	0
83	1	0	0	0	0	0	0	0	0	0	0	0	0	0	0	0	0	0	0	0	0	0	0	0	0	0	0	0	0	0	0	0	0	0	0	0	0	0	0	0	1	0	0	0	1	0	0	0	0
84	1	0	0	0	0	0	0	0	0	0	0	0	0	0	0	0	0	0	0	0	0	0	1	0	0	0	0	0	1	0	0	0	0	0	0	0	0	0	0	0	1	1	1	0	1	0	0	0	0
85	1	0	0	0	0	0	0	0	0	1	0	0	0	0	0	0	0	0	0	0	0	0	0	0	0	0	0	0	0	0	0	1	0	0	0	0	0	0	0	0	1	0	0	1	1	0	0	0	0
86	0	0	0	0	0	0	0	0	1	0	0	0	0	0	0	0	0	0	0	0	0	0	0	0	0	0	1	0	0	0	0	0	0	0	0	0	0	0	0	0	1	0	0	0	1	0	0	0	0
87	0	0	0	0	0	0	0	0	0	0	0	0	0	0	0	0	0	0	0	0	0	0	0	0	0	0	0	0	0	0	0	0	0	0	0	0	0	0	0	0	1	1	0	0	1	0	0	0	0
88	1	0	0	0	0	1	0	0	0	0	0	0	0	0	0	0	0	0	0	0	0	0	0	0	0	0	0	0	1	0	0	1	0	0	0	0	0	0	0	0	1	0	0	1	1	0	0	0	0
89	1	0	0	0	0	0	0	0	0	0	0	0	0	0	0	0	0	0	0	0	0	0	0	0	0	0	0	0	0	0	0	1	0	0	0	0	0	0	0	0	1	0	0	0	1	0	0	1	0
90	0	0	0	0	0	0	0	0	0	1	0	0	0	0	0	0	0	0	0	0	0	0	0	0	0	0	0	0	0	0	0	1	0	0	0	0	0	0	0	0	1	0	0	0	1	0	0	0	1
91	1	0	0	0	0	0	0	0	1	0	0	0	0	0	0	0	0	0	0	0	0	0	0	0	0	0	0	0	0	0	0	0	0	0	0	0	0	0	0	0	1	0	1	0	1	0	0	0	0
92	0	0	0	0	0	0	0	0	0	0	0	0	0	0	0	0	0	0	0	0	0	0	0	0	0	0	0	0	0	0	0	1	0	0	0	0	0	0	0	0	1	0	0	0	0	0	0	0	1
93	0	0	0	0	0	0	0	0	0	0	0	0	0	0	0	0	0	0	0	0	0	0	0	0	0	1	0	0	0	0	0	0	0	0	0	0	0	0	0	0	0	0	0	0	1	0	0	0	0
94	0	0	0	0	0	0	0	0	0	0	0	0	0	0	0	0	0	0	1	0	0	0	0	0	0	0	0	0	1	0	0	1	0	0	0	0	0	0	0	0	0	0	0	0	1	0	0	0	0
95	1	0	0	0	0	0	0	0	0	0	0	0	0	0	0	0	0	0	0	0	0	0	0	0	0	0	0	0	0	0	0	0	0	0	0	0	0	0	0	0	1	1	1	0	1	0	0	0	1
96	1	0	0	0	0	1	0	0	1	0	0	0	0	0	0	0	0	0	0	0	0	0	0	0	0	0	0	0	0	0	0	1	0	0	0	0	0	0	0	0	1	1	0	0	1	0	0	0	1
97	1	0	0	0	0	0	0	0	0	0	0	0	0	0	0	0	0	0	0	0	0	0	1	0	0	0	0	0	0	0	0	1	0	0	0	0	0	0	0	0	1	0	0	0	0	0	0	0	1
98	1	0	0	0	0	0	0	0	0	0	0	0	0	0	0	0	0	0	0	0	0	0	0	0	0	0	1	0	0	0	0	0	0	0	0	0	0	0	0	0	1	1	1	0	1	0	0	0	0
99	0	0	0	0	0	0	0	0	1	0	0	0	0	0	0	0	0	0	0	0	0	0	0	0	0	0	0	0	0	0	0	1	0	0	0	0	0	0	0	0	1	0	0	0	1	1	0	0	1
100	1	0	0	0	0	1	0	0	0	0	0	0	0	0	0	0	0	0	0	0	0	0	1	0	0	0	0	0	0	0	0	0	0	0	0	0	0	0	0	0	1	0	0	0	1	0	0	0	0
[truncated: 147 more columns]

## Sheet: Supplementary Table 6
Supplementary Table 6: The kernel weights assigned to 196 pathways in the PID collection by PrognosiT algorithm in 100 replications on thyroid carcinoma (i.e. THCA) dataset.
Replication	PID_FANCONI_PATHWAY	PID_SMAD2_3NUCLEAR_PATHWAY	PID_FCER1_PATHWAY	PID_ENDOTHELIN_PATHWAY	PID_BCR_5PATHWAY	PID_PRL_SIGNALING_EVENTS_PATHWAY	PID_RHOA_PATHWAY	PID_ERBB4_PATHWAY	PID_AURORA_B_PATHWAY	PID_LYSOPHOSPHOLIPID_PATHWAY	PID_INSULIN_PATHWAY	PID_NOTCH_PATHWAY	PID_INTEGRIN1_PATHWAY	PID_P73PATHWAY	PID_P38_MKK3_6PATHWAY	PID_GMCSF_PATHWAY	PID_WNT_NONCANONICAL_PATHWAY	PID_NFKAPPAB_ATYPICAL_PATHWAY	PID_IL4_2PATHWAY	PID_HDAC_CLASSII_PATHWAY	PID_BETA_CATENIN_DEG_PATHWAY	PID_HDAC_CLASSIII_PATHWAY	PID_GLYPICAN_1PATHWAY	PID_TCR_PATHWAY	PID_IL27_PATHWAY	PID_NFKAPPAB_CANONICAL_PATHWAY	PID_E2F_PATHWAY	PID_ER_NONGENOMIC_PATHWAY	PID_DNA_PK_PATHWAY	PID_HIF2PATHWAY	PID_CD40_PATHWAY	PID_ATR_PATHWAY	PID_INTEGRIN_CS_PATHWAY	PID_MET_PATHWAY	PID_PTP1B_PATHWAY	PID_INTEGRIN3_PATHWAY	PID_IL12_2PATHWAY	PID_S1P_S1P3_PATHWAY	PID_LPA4_PATHWAY	PID_AR_PATHWAY	PID_NFAT_TFPATHWAY	PID_EPHB_FWD_PATHWAY	PID_AVB3_OPN_PATHWAY	PID_S1P_S1P4_PATHWAY	PID_FRA_PATHWAY	PID_MYC_ACTIV_PATHWAY	PID_ARF6_TRAFFICKING_PATHWAY	PID_RHOA_REG_PATHWAY	PID_REELIN_PATHWAY
1	0.0298293	0	0	0	0	0	0.000181503	2.45435e-05	0	0	0	2.56335e-05	0	0	0	0	0	0.00024768	0	0	0	0	0.000133187	0	0	0	0	0	0	0	0	0	0	0	0.00539682	0	0	0	0	0	0.102639	0.0316231	1.98783e-05	0	0.0306214	0	0	0.000246647	0
2	0	0	0	0	0	0	0.000311859	0	0	1.25724e-05	0	0.0145471	0	0.000189994	0	0	0	0	0.000138717	0	0.000437099	0	0	0	0	0	0.00480165	0	0	0	0	0.0296755	0	0	1.11802e-05	0	0	0	0	0	0.000134509	0.000192731	0	0.00400312	0.0305924	0.013626	0	0	0.0246069
3	0.0234137	0	0	0	0	0	0.000968589	0	0.0109999	0	0	0.000360167	0	0	0	0	0	0	0	0	0	0	0.022146	0	0	0	0	0	4.75941e-05	0	4.2066e-05	0.00488572	0	0	0	0	0	0	0	0	0.0694549	0.0117326	0	0	0.0577246	0	0	0	0.0108267
4	2.27244e-05	0.00260918	0	0	0	0.0112724	0.00095711	0	0.0109333	0.00101363	0	0	0	0	0	0	0	0	0.000255594	0	0	0.00334072	0	0	0	0	0	0	0.00978174	0	0	0.00627245	0	0	1.06582e-05	0	0	0	0	0	0.0163614	0	0.00058253	0.00503133	0.0270426	0.00103869	0	1.99184e-05	0.0128912
5	0.00379629	0	0	0	0	0.00977361	0.00717312	0	0	0	0	0	0	0	0	0	0	0	0	0	0	0	0	0	0	0	5.09477e-05	0	0	0	0	0.0587129	0	0	0	0	0	0	0	0	0.0963527	0	0	0	0.0144665	0	0	0	0
6	0	0.000437035	0	0.000152807	0.00316086	0.0181704	0	0	0.0139911	1.57363e-05	0	0	0	0	0	0	0	0.0160955	2.99083e-05	0.000204805	0	0	2.27694e-05	0	0	0	0.000145915	7.51984e-05	0.00458445	0	0	0.0419809	0.00041048	0	1.97065e-05	0	0	0	0	0	0.0388697	0.00373745	0.000331039	0.0065213	0.0172962	0	0	0.0168682	0
7	0.0825874	0	0	0	0	0.0108016	1.42063e-05	0	0	0	0	0	0	0	0	0	0	0	0	0	0	0	0.0229935	0	0	0	0	0	0	0	0.0147599	0.0529155	0	0	0	0	0	0	0	0	0.0401708	0	0.000309417	0	0.0746133	0	0	6.16787e-05	0.0183744
8	0.0501345	0	0	0	0	0.00131302	0	0	0	0	0	0	0	0	0.0095018	0	0.0124556	0	0	0	0	0	0.00183935	0	0	0	0	0	0	1.863e-05	0	0	0	0	0	0	0	0	0	0	0.109937	0.0168654	0	0	0.00510408	0	0	0.0197317	0
9	0.0614423	0	0	3.05015e-05	0	0.00337873	0	0	0	0	0	0	0	0	0	0	0	0	0	0	0	0	0	0	0	0	0	0	3.39437e-05	0	0	0.00342323	0	0	0	0	0	0	0	0	0.0759985	0.032218	1.41618e-05	0	0.0937367	0	0	7.73479e-05	0.000342055
10	0.0481988	0	0	0	0	0.000103297	0.00242773	0	6.75861e-05	2.68433e-05	0	0	0	0	0	0	0	0.00603809	0	0.000478465	0	0	0.000382592	0	0	0	0.00134597	0	0	0	0	0.0196794	0	0	0	0	0	0	0	0	0.0752101	0	2.28443e-05	0.000321976	0.0187693	0	0	0.018369	0
11	0.0841643	0	0	0	0	0.000166415	0	0	0	0	0	0	0	0	0	0	0	0	0	0	0	0	0.000272359	0	0	0	0	0	2.2614e-05	0	0	0	0	0	0	0	0	0	0	0	0.0701823	0.193845	0	0	0	0	0	0	0
12	0.0256369	0	0	0	0	0	0	0	0.000211163	0	0	0	0	0	0	0	0	0	0	0	0	0.00107972	0.00108185	0	0	0	0.049326	0	0.00333694	0	0	0	0	0	0	0	0	0	0	0	0.100994	0.0352652	0.000222771	0	0.00717754	0	0	0	0
13	0.0621021	0	0	0	0	0.0117893	0	0	0.00250978	0	0	0.00043048	0	0	0	0	0	0	0	0	0	0	0.00231375	0	0	0	3.5799e-05	0	0.00186233	0	0	0.000776004	0	0	0	0	0	0	0	0	0.0818331	0	0	0	0.0670256	0	0	0	0.0228577
14	0	0.000863041	0	0	0	0.0125327	5.24563e-05	0	0.00288886	0.0155856	0	0	0	0	0	0	0	0	0.0189086	0	0	0	0	0	0	0	0.00207087	0	0	0	0.00240022	0.0418482	0	0	0	0	0	0	0	0	0.0201467	0	0.000205742	0.00250695	0.029467	0	0	0	0
15	0.000910426	0	0	0	0	0.0510952	0.000878215	0	0	0	0	0	0	0	0	0	0	5.48918e-05	0	5.02752e-05	0	0.0184296	0	0	0	0	0	0	0	0	0	0.0441884	0	0	0	0	0	0	0	0	0.0373877	0	0.000176229	0.0100509	0.0457885	0	0	0.000407581	0
16	0.0642477	0	0	0	0	0.00636434	0	0	0	0	0	0	0	0	0	0	0	0	0	0.00237583	0	0	0.00604621	0	0	0	0.000719141	0	0	0	0	0.000562075	0	0	0	0	0	0	0	0	0.0318002	0.0579032	0.00182075	0	0.0846137	0	0	0.00348614	0
17	0.00206443	0	0	0	0	0.0107048	3.92635e-05	0	0.0253659	0	0	0	0	0	0	0	0	0	0	0	0	0	0.0103773	0	0	0	2.6186e-05	0	0.00562854	0	1.1253e-05	0.0309335	0	0	0	0	0	0	0	0	0.00799681	0.000264602	0.000408943	0.000466568	0.0458829	0.0113745	0	0	0.0357532
18	0.0217062	0	0	0.026198	0	0	0.00239783	0	0.0233156	0.000836944	0	0	0	3.21957e-05	0	0	0	0.00159449	0	8.63058e-05	0	0	0.0201723	0	0	0	0.00442928	0	0.00256891	0	0	0.059896	0	0	0	0	0	0	0	0	0.0379893	0.00237759	0.0514993	0.00155929	0.0136048	0	0	0	0.0451313
19	0.064785	0	0	1.02532e-05	0	0.0462086	0	0	0.0102837	0.000443506	0	0	0	0.000438663	0	0	0	0	0	0	0	0	0.020699	0	0	0	0	0	0	0	4.43942e-05	0	0	0	0.000363406	0	0	0	2.90355e-05	0	0.0484889	0.0174644	0	0	0.000522915	0	0	0	0
20	0	0	0	0	0	0.0097691	0	0	0	0	0	0	0	0	0	0	0	0	0	0	0	1.88313e-05	0.0240697	0	0	0	0	0	0	0	0	0	0	0	0	0	0	0	0	0	0.0925439	0	0	0	0.00369882	0	0	0.000172634	0
21	0.0600779	0	0	0	0	0.00475074	0	0	0	0	0	0	0	0	0	0	0	0	0	0	0	0	0.00355608	0	0.0152919	0	0	0	0	0	0	0.00248663	0	0	2.53651e-05	0	0	0	0	0	0.0521215	0	8.11152e-05	0	0.00215848	2.57396e-05	0	0	0
22	0.0706986	0	0	0	0	1.29588e-05	0	0	0	0	0	0	0	0	0	0	0	0.00281224	0	0	0	0	0.00064875	0	0	0	0.0171576	0	0	0	0	0.000174216	0	0	0	0	0	0	0	0	0.0516222	0.0314223	0	0	0.0402509	0	0	0	0
23	0.0291096	0	0	0	0	1.57848e-05	0.00227702	0	0.00193527	0	0	0	0	0	0	0	0	0	0	0	0	0	0.029834	0	1.17287e-05	0	0.00364328	0	0	0	0	0	0	0	0	0	0	0	0	0	0.103573	0.0273463	0	0	0.0305778	0	0	0	0
24	0.0301125	0	0	0	0	0.0281823	0	0	0	0	0	0	0	0	0	0	7.66032e-05	0	0	0	0	0	0.0321022	0	0	0	0	3.30878e-05	0	0	0	0.0361141	0	0	0	0	0	0	0	0	0.0982974	0	0	0.00299203	0.0407893	0	0	0	1.20378e-05
25	0.00219012	0	0	0	0	0	0	0	2.29299e-05	0	0	0	0	0.000221185	0	0	0	0	0.00873867	0	0	0	5.01914e-05	0	0	0	0	0	0	0	0.000318925	0.0409627	0	0	0	0	0	0	0	0	0.00725467	0.00211381	0	0	0.064608	0	0	0	0.0332535
26	0	0	0	0	0	0.009714	0.00069474	0	0.0017944	0.000383728	0	0	0	0	0	0	0	0	0	0	0	0	0	0	0	0	0	0	0.0183915	0	0	0.0370479	0	0	0	0.00110603	0	0	0	0	0.00180707	0	0.000437347	0	0.0210409	0.0674281	0	0	0.00205742
27	9.50093e-05	0	0	1.56813e-05	0	0	0.0295378	0	0	0	0	0	0	0	0	0	0	0	0	0	0	0	0.000234676	0	0	0	0	0	0.000930681	0	0	0	0	0	0	0	0	0	0	0	0.0226703	0	0	0	0.0533646	0.0587622	0	0	0.00532451
28	0.0334628	0	0	0	0	0	0	0	0.0102583	0	0	0	0	0	0	0	0	0.00150358	0	0	0	0	0	0	0	0	0	0	0.000302094	0	0.010715	0	0	0	0	0	0	0	0	0	0.0769413	0	0.0141359	0	0.0378665	1.23826e-05	0	0.00387979	0.0135273
29	0.0427367	0	0	0	0	2.82853e-05	0	0	0	0	0	0.000119194	0	0	0	0	0	0.00277835	0	0	0	0	0.0296179	0	0	0	0	0	0.0061875	0	0	0.0319705	0	0	0.00102411	0	0	0	0	0	0.0515577	0.0398682	6.32007e-05	0	0.0640013	0	0	0	0
30	0.0455895	0	0	1.64212e-05	0	0.0133806	0	0	0	0	0	0	0	8.22399e-05	0	0	0	2.19692e-05	0	0	0	0	0.0180171	0	0	0	0.000782732	0	0.000321963	0	0	0.000139723	0	0	0	0	0	0	0.00214772	0	0.113163	0.0465709	0	0	0.0349308	0	0	0	0.00019708
31	0.0814263	0	0	0	0	0.000527934	0	0	0.00402764	0	0	0	0	0	0	0	0	0	0	0	0	0	3.35101e-05	0	0	0	3.3573e-05	0	0	0	0	0	0	0	0	0	0	0	0	0	0.107946	0.0475175	0.000129421	0	0.0248464	0	0	0	0
32	0.00193617	0	0	0.000353723	0	0	0.00253145	0	0	0.00023599	0	0	0	0	0	0	0	1.48065e-05	0	0.000915312	0	0.0112116	0.00968528	0	0.00246925	0	0.000249615	0	0	0	0	0.0175547	0	0	0.000158384	0	0	0	0	0	0.0169557	0.0191093	0.0330305	0	0.0332768	0	0	1.36862e-05	0.0110691
33	0.0343977	0	0	0	0	0	7.02121e-05	0	0	0	0	0	0	0.000597463	0	0	0	0	0	2.8041e-05	0	3.95415e-05	0	0	0	0	0	0	0	0	0	0.00412336	0	0	0	0	0	0	0	0	0.0496178	0.00148768	0	0	0.0211802	0.00395733	0	0	5.45648e-05
34	0.00971034	0	0	5.01126e-05	0	0	0	0	0.0325545	0	0	0	0	1.89682e-05	0	0	0	0	0.00793984	0	0	0	0.00592516	0	5.26569e-05	0	0	0	0.00130677	0	0	0.00763695	0	0	3.98812e-05	0	0	0	0	0	0.0428681	0.00133433	0.014518	0	0.0324252	0.00328829	0	2.06697e-05	0
35	0	0.00109731	0.00665289	0.0289973	0	1.08321e-05	0	0	0	2.39328e-05	0	0	0	0	0	0	0	0	0	0.00100914	0	0.000102822	4.44251e-05	0	0	0	0	0	0	0	0	0.0305057	0	0	0	0	0	0	0	0	0.0513783	0	0.0153526	0	0.0220757	0.000916744	0	0	0.00802967
36	0.0773109	0	0	0	0	0.00197499	0	0	0	0	0	0	0	0	0	0	0	0	0	0	0	0	0.00827576	0	0	0	0	0	0	2.62922e-05	0	0	0	0	0	0	0	0	0	0	0	0	0	0.00122636	0.0744109	0	0	0	0
37	0.0994649	0	0	0	0	0.0265506	0	0	0	8.32886e-05	0	0	0	0	0	0	0	0	0	0	0	0	0.000417204	0	0	0	0	0.0303416	0	0	0	0.0039197	0	0	0	0	0	0	0	0	0.0613894	0.000844632	0	0.00189051	0.0238732	0	0	0.000184036	0
38	0.0590977	0	0	0	0	0.0212334	0	0	0	0	0	0.000661394	0	0	0	0	0	1.6522e-05	0	2.99449e-05	0	0	0.000114936	0	0	0	0.00302442	0	0.00191369	0	0	0.00012554	0	0	0	0	0	0	0	0	0.0613033	0.023454	2.60453e-05	0	0.0471224	0	0	0.00600677	0
39	0	0	0	0	0	0	0.000379235	0	0	0	0	1.01393e-05	0	0.000291128	0	0	0	0.00159831	0	0	0	0	0	0	0	0	0	5.4377e-05	0	0	0	0.0719137	0	0	0	0	0	0	0	0	0.0541577	0	0	0.000575838	0.0225274	0	0	0	0
40	0	0	0	0	0	0.000161472	0	0	2.768e-05	0	0	0	0	0	0	0	0	0	0	0	0	0	0	0	0	0	0.000310479	0	0	0	0	0.0241937	0	0	0	1.29869e-05	0	0	0	0	0.0841953	0	0	0	0.0751898	0.000158597	0	0	0
41	0.0054814	2.27652e-05	0	0.000105329	0	0.000113371	0	0	0.000392471	0.00331225	0	0	0	0.000622951	0	0	0	0	0	0.000442869	0	4.08683e-05	0.0068103	0	0	0	0	0	0.0135606	0	0	0.0367196	0	0	0	0.0256104	0	0	0	0	0.00854998	0.0117107	0.00959356	0	0.0121375	0	0	0.000966133	0.00125332
42	0.0473628	0	0	0	0	0.0148715	0.00236933	0	0	0	0	4.91651e-05	0	0	0	0	0	0.00968167	0	0	0	0	0.000136611	0	0	0	0	0	0	0	0	0.0213584	0	0	0	0	0	0	0	0	0.0776487	0.0231827	0.0268639	0.0115987	0.00385463	0	0	0	0.00583913
43	0.0692528	0	0	0	0	0	0	0	0	0	0	0	0	0	0	0	0	1.45911e-05	0	0	0	0	0.0133838	0	0	0	0	0	0.00013062	0	0	0.016141	0	0	0	0	0	0	0	0	0.0984656	0.031107	1.57439e-05	0	0.0443264	0	0	0	0
44	0.102952	0	0	0	0	0	0	0	0.00237858	0	0	0	0	0	0	0	0	0	0	0	0	0	0.0202508	0	0	0	0	0	0.00592635	0	0	0	0	0	0	0	0	0	0	0	0.0561482	0.0395025	7.96531e-05	0	0.0213909	0	0	0	0
45	0.00251784	0	0	0	0	0.0318338	0	0	0	0	0	0	0	0	0	0	0	0	0	0	0	0.00946954	0.00102042	0	0	0	0	0	0	0	0	0.0682559	0	0	0.000521095	0	0	0	0	0	0.0488123	0	0	0.00982971	0.0100271	0	0	0.000578767	0
46	0.0455768	0	0	0	0	0.00387589	0	0	0	4.33051e-05	0	0	0	0	0	0	0	0	0	0	0	0	0.0201286	0	0	0	0	0	0	0	0	3.18845e-05	0	0	0.000198573	0	0	0	0	0	0.0262848	0	0.000266885	0	0.0151723	0	0	0.00386633	2.62067e-05
47	0.0481684	0	0	0	0	0	0	0	0	0	0	0	0	0	0	0	0	0	0	0	0	0.000396482	3.59221e-05	0	0	0	0	0	0	0	0	7.41382e-05	0	0	0	0	0	0	0	0	0.107562	0	0	0	0.00088219	0	0	0.0136068	0
48	0	0	0	0	0	0	4.89858e-05	0	0	0	0	0	0	0	0	0	0.00610753	0	0	0	0	0	0	0	0	0	0.043984	0	0	0	0.00244359	0	0	0	0	0	0	0	0	0	0	0	0	0	0.0882433	0	0	0	0
49	0.0457677	0	1.11229e-05	0	0	0	0	0	0.0217122	3.66814e-05	0	0	0	0	0	0	0	0	0	0	0	0	0.0412722	0	0	0	0	0.000850943	0	0	0	0	0	0	0.0114632	0	0	0	0	0	0.0285877	0.0645728	0.000255606	0	0.0654706	0	0	0	0
50	0.0367292	0	0	0	0	0.0084602	0.00158976	0	3.15948e-05	0	0	0	0	0	0	0	0	0.000117241	0	0	0	0	0	0	0	0	0	0	0.0262816	0	0.00869609	0.000423524	0.00408972	0	1.16882e-05	0	0	0	0	0	0.095151	0	0	0	0.0290834	0.00583073	0	0	0.00480909
51	9.24538e-05	0	0	0.00225792	0	0	0.00270274	0	0.0133495	0	0	0	0	0	0	0	0	0	0	0	0	0	9.66667e-05	0	4.65504e-05	0	0.000252712	0	0.00642136	0	0	0.0213058	0	0.000910148	8.69449e-05	0	0	0	0	0	0.0722951	0.0277246	0.0229653	0	0.0515047	0	0	0	0.000119729
52	0.052747	0	0	0	0	0.00382936	0	0	0	0	0	0	0	0	0	0	0	0	0	0	0	0	0.0215185	0	0	0	0	1.77875e-05	0	0	0	1.40405e-05	0	0	0	0	0	0	0	0	0.123898	0.0211794	2.44133e-05	0	0.0283975	0	0	0	0
53	0.0952099	0	0	0	0	0.00152314	0	0	0	0	0	0	0	0	0	0	0	0	0	0	0	0	0	0	0	0	0	0	0	0	0	0.000795953	0	0	5.55295e-05	0	0	0	0	0	0.038346	0	0	0	0.020139	0	0	0	0
54	6.72961e-05	0	0	0	0	0	0	0	0	0	0	0	0	0	0	0	0	0	0	0	0	0.0220832	0.0461288	0	0	0	0.00387884	0	0.00448153	0	0	0	0	0	0	0	0	0	0	0	0.0465535	0.191049	0	0	0.0175527	0	0	0	0
55	0.0283443	0	0	0	0	3.45645e-05	0.0149085	0	0.0293396	0	0	0	0	0	0	0	0	0.00625051	1.04099e-05	0	0	0	0	0	0	0	0	0.0114415	0.00014878	0	0	0.00158567	0	0	0	0	0	0	0	0	0.0276529	0.0221812	0.0185278	0	0.0617795	0	0	0	5.1097e-05
56	0.0169408	0	0	4.20903e-05	0	0.0108325	0	0	0.0211076	0	0	0	0	0	0	0	0	0	0	0	0	0	0.0102859	0	0	0	0	0	0.000785605	0	0	0.0167427	0	0	0	0	0	0	0	0	0.0848424	0.0535196	0.00538994	0	0.0566241	0	0	0	0.000655576
57	0	0	0	0	0	0	0	0	0	0	0	0	0	0	0	0	0	0	0	0	0	0	2.0446e-05	0	0	2.18494e-05	0	0	0	0	0	0	0	0	0	0	0	0	0	0	0	0	0	0	0.159016	0	0	0	0
58	0.0189646	0	0	0	0	0.0329197	0	0	0.00441382	0	0	0	0	0	0	0	0	0	0	0	0	0	0	0	0	0	0	1.139e-05	0	0	0	0	0	0	0	0	0	0	0	0	0.0636371	0	0	0	0.0116534	0	0	0	0.0247904
59	0.0481713	0	0	0	0	2.66109e-05	0	0	0	8.18701e-05	0	0	0	6.51342e-05	0	0	0	0.00359305	0	0	0	0	0.0169256	0	0	0	0.00010464	0	1.85022e-05	0	0	0.000988843	0	0	0	0	0	0	0	0	0.00923951	0.0592396	0.00338144	0	0.0250958	0	0	0	0
60	0	0	0	0	0	0	0	0	0.0210685	0	0	0	0	0	0	0	0	0.00014411	0	0	0	0	1.48464e-05	0	0	0	0	0	0	0	0	0	0	0	0	0	0	0	0	0	0	0	0.000183096	0	0.0869178	0	0	0	0
61	0.0257102	0	0	0.000410865	0	0.000132848	0	0	0	0	0	0	0	0	0	0	0	0.000101737	0	5.35362e-05	0	0.000360322	0.0259424	0	0	0	0	0	0	0	0	0.0275919	0	0	0	0	0	0	0	0	0.0597222	0.00729544	0.0123016	0	0.00121344	0.000658482	0	0	0
62	7.59683e-05	0	0	0	0	0.000599641	0	0	0.00568072	0	0	0.000330234	0	0.000304308	0	0	0	0	0	0	0	0	2.26977e-05	0	0	0	0	5.41984e-05	0	0	0	0.0241373	0	0	0	0	0	0	0	0	0.059589	0	0	0	0.0014377	0.00402099	0	0	0
63	0.00549142	0	0	0	0	0.000110462	0	0	5.60903e-05	0	0	0	0	0.0060307	0	0	0	0	0	0	0	0.00520207	0.0119115	0	0	0	5.15277e-05	0	7.90312e-05	0	0	0.0191483	0	0	0	0	0	0	0	0	0.143749	0.0274187	0	0	0.000153003	0	0	0	0.019726
64	0.045865	0	0	0	0	1.35095e-05	0	0	0	0	0	0	0	0	0.00556912	0	0	0	0	0	0	0	0	0	0	0	0	0	0	0	0	0.000656122	0	0	0	0	0	0	0	0	0.114524	0	0	0	0.0279043	0	0	2.17123e-05	0
65	0.00246448	0	0	0	0	0.0287878	0.000451727	0	0	0	0	0.0130552	0	0	0	0	0	0	0	0	0	0	0.00336894	0	0	0	0	0	0	0	0	0.0696035	0	0	0	0	0	0	0	0	0.0112453	0	0.0141155	0.00643805	0.0659461	0	0	0	0.0641541
66	0.0167733	0	0	0	0	4.16689e-05	0	0	0	0	0	0	0	0	0	0	0	0.000768588	0	0.00483822	0	1.30678e-05	0.00508823	0	0	0	0.0143566	0	0.00462565	0	0	0.02746	0	0	2.23861e-05	0	0	0	0	0.000287251	0.0738	1.41996e-05	0.0204907	0	0.0295036	0	2.73376e-05	0.00108822	0
67	0.0427585	0	0	0	0	7.29247e-05	0	0	0	0.000293318	0	0	0	0	0	0	0	0	0	0	0	0	0.00140844	0	0	0	0	0	0	0	0	0.0461836	0	0	0	0	0	0	0	0	0.0302091	0	0.00204952	0	0.0161915	4.96118e-05	0	0	0
68	0.00203663	0	0	0	0	0.00491143	2.94429e-05	0	3.20619e-05	0.038621	0	0	0	0	0	0	0	0	0.000227074	0	0	0	0.0264919	0	0	0	0	2.88381e-05	0	0	0	0.0266604	0	0	0	0	0	0	0	0	0.0650955	0	4.75665e-05	0	0.0422007	0	0	0.000297791	0.0245282
69	0.0316126	0	0	0.0224946	0	0.000877836	0.00157746	0	0.0268254	0.00115551	0	0	0	0	0	0	0	0	0	0	0	0	0	0	0	0	0	0.000107017	0.00403804	0	0	0.0201489	0	0	0	0	0	0	0	0	0.0314011	0.0124737	0.00411657	0.00124439	0.0354418	0	0	0.00861543	0.00102019
70	0.083434	0	0	0	0	0.00805605	0	0	0.0012997	0	0	0	0	2.64231e-05	0	0	0	0	0	0	0	0	0.0159877	0	0.00779183	0	0.000126339	0	0	0	0	0.00182052	0	0	0	0	0	0	0	0	0.0743569	0.0030002	0	0	0.0022785	0.00102981	0	0	0.0241937
71	0.0562353	0	0	0	0	0	0	0	0	0	0	0	0	0	0	0	0	0	0	0	0	0	0	0	0	0	0.000225371	0.000911574	0.000163694	0.000110113	0	0	0	0	0	0	0	0	0	0	0.0478514	0.026125	0	0	0.0473672	0	0	0	0
72	0.0125254	0	0	0	0	0	0	0	0	0	0	0	0	0	0	0	0	0	0	0	0	0.00325365	0.000726064	0	0	0	0	0	0.000435318	0	0	0	0	0	0	0	0	0	0	0	0.0909857	0.0221205	0	0	1.88441e-05	0	0	0	0
73	0.014219	0	0	5.50655e-05	0	0.00644636	0.000184243	0	0	0	0	0	0	0	0	0	0	0	0	0	0	0	0	0	0	0	0.0201072	0	0	0	0	0.00015829	0	0	0	0	0	0	0	0	0.0768222	0	0.00173227	0	0.034688	0	0	0.000116727	0
74	0	0	0	0	0	0.00584334	0	0	0	0	0	0	0	0	0	0	0	0.0110008	0	0	0	0	0.0314271	0	0	0	0	0	0	0	0.000168595	0.0603337	0	0	0	0	0	0	0	0	0.0962585	0.0137315	1.72685e-05	0	0.049106	0	0	0	0.00604076
75	0.00539359	0	0	0	0	0	3.37832e-05	0	0.0113882	1.86069e-05	0	1.10811e-05	0	0.00127316	0	0	0	0	0	0	0	0	1.33295e-05	0	0	0	0	0	0.000116479	0	0	0.019977	0	0	0.000116276	0	0	0	0	0	0.0297332	0	0.0113149	0	0.05687	0	0	0	0
76	0.0380559	0	0	1.03482e-05	0	0	0	0	0.000405816	0	0	0	0	0	0	0	0	0	0	0	0	0	0.0273103	0	0	0	0	0	6.15334e-05	0	0	0.000191822	0	0	0	0.0149851	0	0	0	0	0.0225324	0	0.0024919	7.20952e-05	0.0138213	0	0	0	0
77	0.0066418	0	0	1.29388e-05	0	0	0.0174455	0	0.0138489	0	0	0	0	0	0	0	0	0	0	0	0	0	0	0	1.39866e-05	0	0	0	0	0	0	0.0623999	0	0	0	0	0	0.00262884	0	0	0.0706729	0	0.00452523	0.000288462	0.0508615	0	0	0.000471788	0
78	0.0589926	0	0	8.12117e-05	0	0	0.000289494	0	0	1.46089e-05	0	0	0	1.04486e-05	0	0	0	0	0	0	0	0	0.0264712	0	0	0	0	0	0	0	0	0.0284441	0	0	0	0	0	0	0	0	0.0427216	0.0203689	0.000127886	0	0.0641476	0	0	0.00116097	0
79	0.0142133	0	0	0	0	0.00166546	0.0008759	0	0	0	0	0.000703971	0	0	0	0	0	0	0	0	0	0	0	0	0	0	0	0	0	0	0	0.0463717	0	0	0	0	0	0	0	0	0.0323309	0	0	0	0.0308086	0	0	5.94014e-05	0
80	0.018366	0	0	0	0	0	0	0	0	0	0	0	0	0	0	0	0	0	0	0	0	0.0161871	0.0415853	0	0	0	0	0	0.000558175	0	0	2.07969e-05	0	0	0	0	0	0	0	0	0.0933052	0.0648868	0	0	0	0	0	0	0
81	0.0594106	0	0	0	0	0.00562162	0	0	0.000108375	0	0	0	0	0	0	0	0	0.00212117	0	0	0	0.00021355	0.000813916	0	0	0	0	0	0.0105627	0	0	0	0	0	0	0	0	0	0	0	0.0886796	0.054887	0.000223289	0	0.0318605	0	0	0	0.00067282
82	0.0718872	0	0	0	0	0	0.00074841	0	0.000496101	0	0	0	0	0	0	0	0	0	0	0	0	0	0.0078422	0	0	0	0	0.000580337	0	0	0	0.0113395	0	0	0	0	0	0	0	0	0.070504	0	0	0.00626815	0.0396576	0	0	0	0.00175341
83	0.0482634	0	0	0	0	0	0	0.00498265	0.00130636	0	0	0	0	0.000141713	0	0	0	0	0	0	0	0	0	0	0	0	0	0	0	0	0	1.20889e-05	0	0	0	0	0	0	0	0	0.0855978	0	0	0	0.0492016	0	0	0.000409871	0
84	0.0518202	0	0	0	0	0.00602308	0	0	0.0062382	4.43969e-05	0	0	0	0	0	0	0	0	0	0	0	0	0.027505	0	0	0	4.11182e-05	0	0.0143117	0	0	0	0	0	0	0	0	0	0	0	0.0789045	0.0138725	0.0122165	0	0.026902	0	0	0	0
85	0.0380416	0	0	0.00144845	0	0.00326076	0	0	0	0.0156997	0	0	0	0	0	0	0	0.000475015	0	7.53434e-05	0	0.00014066	0.000234069	0	0	0	0	0	0.00482967	0	0	0.0207261	0	0	5.02596e-05	0	0	0	0	0	0.0451653	0	0.000290486	0.0182946	0.0382654	0	0	0	0.00793861
86	0.00496167	0	0	0	0	0	0.0064529	0	0.0290134	0	0	0	0	0	0	0	0	0	0	0	0	0	0	0	0.00915922	0	0.0107752	0	0	0	0	0.00880028	0	0	0	0	0	0	0	0	0.0639033	0	0	0	0.0158531	0	0	0	0.0093707
87	0.00154774	0	0	0	0	0	0	0	0.000241535	0	0	0	0	0.00029528	0	0	0	0.000268659	0	0	0	0	0.000740644	0	0	0	0.00285792	0	0	0	0	0	0	0	0	0	0	0	0	0	0.0845406	0.0641845	0	0	0.0332569	0	0	0	0
88	0.0239135	0	0	0	0	0.0176946	0	0	0	0	0	0	0	0	0	0	0	0	0	0	0	0	0	0	0	0	0	0	0.0142031	0	0	0.0497642	0	0	0	0	0	0	0	0	0.0430956	3.31751e-05	0.00131735	0.0209776	0.0680197	0	0	0	6.06148e-05
89	0.0374985	0	0	1.65077e-05	0	0	6.11081e-05	0	0.00531066	0	0	0	0	0	0	0	0	0	0.0002064	0	0	0	2.2784e-05	0	0.000337007	0	0	0	6.80178e-05	0	0.000828158	0.0150119	0	3.63028e-05	0	0	0	0	0	0	0.0123708	0	0	0	0.0421458	0	0	0.0196465	0
90	0	0	0.00549544	0	0	3.45951e-05	0	0	0	0.0192103	0	0	0	0	0	0	0	0	0	0	0	0.0026457	0	0	0	0	0	2.60753e-05	0.000495517	0	0	0.033153	0	0	0	0	0	0	0	0	0.0603239	0	0.000193437	0	0.0338202	1.1604e-05	0	0	0.0131929
91	0.031611	0	0	0	0	8.42719e-05	0	0	0.0109463	0	0	0	0	0.000156251	0	0	0	0	0	0	0	0	0	0	0	0	0	0	0.00451183	0	0.000207034	0	0	0	0	0	0	0	0	0	0.012011	0.00487477	0.0201533	0	0.0439355	0	0	0.000400839	0
92	0.00258819	0	0	6.9699e-05	0	0	0	0	0.00336325	0	0	0	0	0.00356482	0	0	0	0	0.000735546	0.00066579	0	0	0.00043816	0	0	0	0	0	0	0	0	0.0355172	0	0	0	0	0	0	0	0	0.0280058	0	2.73315e-05	0	0.00941914	0.00716214	0	0	0.0235663
93	0	0	0	0	0	0	0	0	0	0	0	0	0	0	0	0	0	0	0	0	0	0	0	0	0	0.0939944	0	0	0	0	0	0	0	0	0	0	0	0	0	0	0	0	0	0	0.179916	0	0	0	0
94	2.43035e-05	0.000474102	0	0	0	0	0.000187033	0	0.00158072	0	0	0	0	0.0013193	0	0	0	5.51307e-05	0.0103328	0.000265366	0	0.00157016	0	0	0	0	0	0.000770922	0.0120978	0	0	0.0212621	0	0	0	0	0	0	0	0	0.00948911	0.00830097	2.42129e-05	0	0.0307751	1.42061e-05	0	0.000857544	0.00683279
95	0.0308124	0	0	0	0	0.00655914	0.000365179	0	0	0	0	0	0	0	0	0	0	0	0	0.00351654	0	0	0.000630111	0	0	0	0.00254749	0.00401692	0.000709178	0	0	0.000270967	0	0	0	0	0	0	0	0	0.0891143	0.0326528	0.0283393	2.26886e-05	0.0497797	3.89854e-05	0	0.000326203	0.0232404
96	0.0139541	0	0	0	0	0.0256365	0	0	0.043373	0	0	0	0	0	0	0	0	0	0	0	0	0	0	0	3.60238e-05	0	0.000349032	0	0.00309012	0	0	0.0341831	0	0	0	2.67937e-05	0	0	0	0	0.0609592	0.0201426	0	0	0.0194304	0	0	0	0.0106275
97	0.0438753	0	0	0	0	2.92231e-05	0	0	0.00417227	0	0	7.19155e-05	0	0	0	0	0	0	0	2.85188e-05	0	0	0.0102336	0	1.85001e-05	0	0	0	0	0	0	0.0809373	0	0	0	0	0	0	0	0	0.0908654	0	0	0.00235256	0.000230735	0	0	0	0.0198252
98	0.0584637	0	0	0	0	0.00887337	5.06097e-05	0	0	0	0	0	0	0	0	0	0	0.00621087	0	0	0	0	0.000761279	0	0	0	0.0269778	0	0	0	0	0	0	0	0	0	0	0	0	0	0.103733	0.0337124	0.0265938	0	0.0418422	0	0	0.00177582	0.000197613
99	0	0	0	0	0	1.43656e-05	1.79013e-05	0	0.0166503	0.00704809	0	0	0	0.00200532	0	0	0	0	0	0	0	0	0	0	0	0	0.00184857	0	0.00837055	0	0	0.0196593	0	0	0	0	0	0	0	0	0.0272594	0	5.04009e-05	0.000532649	0.0282275	0.0342957	0	0	0.0315946
100	0.0861812	0	0	2.17448e-05	0	0.0256995	0	0	0	0.000230062	0	0	0	0	0	0	0	0	0	0	0	0	0.0271227	0	0	0	0	0.000127668	0.00171762	0	6.6097e-05	4.82191e-05	0	0	0	0	0	0	0	0	0.0584046	0.00713699	0	0	0.0155212	0	0	0	0
[truncated: 147 more columns]

## Sheet: Supplementary Table 7
Supplementary Table 7: Tumour volume prediction values of RF algorithm (RF), SVR algorithm (SVR), and PrognosiT algorithm with the Hallmark gene set collection (MKL[H]) and PrognosiT algorithm with the Pathway Interaction Database pathway collection (MKL[P]) obtained in each replication on thyroid carcinoma (i.e. THCA) dataset.
Replication	Actual	RF	SVR	MKL[H]	MKL[P]
1	22.5	3.82179	3.04687	3.15578	2.43861
1	23.328	7.70376	7.99152	4.40711	5.46903
1	52.5	13.5973	11.5825	15.7351	15.3224
1	2.52	14.7794	85.8489	25.8294	9.63959
1	7.225	18.6298	15.5978	9.7241	11.1784
1	2.145	5.01875	5.08777	16.6784	6.93105
1	9	3.9078	1.13828	0.390232	3.0095
1	20	19.914	52.3667	53.2829	53.0617
1	5.1	18.0543	13.3451	10.7923	20.2106
1	9.044	18.8089	28.1178	29.0141	26.9683
1	11.55	11.9275	12.3913	12.5045	11.1677
1	6.696	8.66001	6.91483	15.8569	7.14699
1	1.008	6.44535	4.50965	6.83939	4.3881
1	13.05	6.04847	6.47424	3.71117	4.5511
1	3.96	8.99034	8.47753	6.7957	15.3459
1	1.56	6.53212	4.95177	8.54492	4.12859
1	23.4	13.8301	15.9481	14.8869	16.6183
1	2.34	18.4969	42.8111	40.4663	17.9864
1	0.252	5.65892	2.80649	1.16702	2.20481
1	2.16	3.85968	1.95421	1.19094	1.57054
1	3.5	8.90324	12.4103	4.7321	12.2572
1	46.494	9.20113	12.9107	12.1998	17.0272
1	1.35	10.9659	52.7755	9.2347	3.78974
1	2.25	7.58873	10.365	4.56742	7.91494
1	18	23.4528	60.2398	66.3072	56.5233
1	40	6.25034	9.18276	20.4749	14.305
1	8	10.2829	17.7564	27.4948	25.2529
1	6	8.70909	9.45668	23.9554	8.08128
1	16.8	17.2401	12.2101	12.3507	24.3726
1	2.85	7.5159	6.18166	7.35414	3.51556
1	58.5	13.9357	21.1127	8.33457	9.73981
1	160	25.1538	41.5162	35.016	37.2982
1	33.75	14.6198	23.6617	11.4321	29.5728
1	54	7.39897	8.56584	7.51616	15.2428
1	33.06	8.91595	6.68468	1.50388	3.76319
1	54	17.1155	29.0992	17.4142	24.6635
1	4.004	6.67763	3.34109	3.00079	4.31556
1	5.5	20.7245	8.24102	5.8155	18.1555
1	7.2	13.3185	14.2999	13.9959	14.1387
1	91.143	17.0943	12.441	15.5467	7.3191
1	1.144	9.11689	15.2831	14.8739	8.37499
1	21.6	16.8093	12.4213	11.1561	12.4678
1	6.552	8.18181	5.30302	1.85117	7.30486
1	1.1	7.4646	5.32183	4.18342	5.84553
1	11.25	31.6907	23.7229	40.348	31.491
1	31.5	12.675	12.2462	11.3477	11.0772
1	58.56	22.7387	22.6399	22.6889	43.4827
1	17.316	13.0018	14.206	15.5086	35.4164
1	10.35	16.1465	10.3795	5.07764	5.81724
1	8.526	14.1798	14.0932	13.211	15.8277
1	3.78	8.31003	3.48243	2.05572	4.4077
1	4.185	11.5648	11.488	5.92473	14.1259
1	6.44	13.5736	9.45543	3.83133	4.89749
1	0.924	5.31367	3.48289	6.84049	3.07012
1	11.718	20.9673	31.2599	25.6887	25.8206
1	11.52	14.5041	22.8981	22.3777	7.64073
1	1.573	10.35	10.1171	8.53316	6.004
1	2.184	23.5929	68.4269	33.6979	41.5
1	1.485	5.81983	6.53553	4.36372	6.2767
1	3.808	13.679	9.15434	8.87076	9.73906
1	1.44	13.2827	25.5919	38.7816	39.6382
1	9	10.1176	8.49299	14.0601	17.3993
1	18.75	11.7857	9.46901	5.59315	14.253
1	4.875	5.66774	1.37332	2.04957	0.545654
1	9	7.36485	3.9159	4.93092	2.39694
1	19.2	9.53935	8.43229	5.40543	10.8171
1	48	5.00459	2.24571	1.9116	0.675271
1	97.5	19.226	30.0172	38.2969	12.6785
1	7.59	12.1096	8.85216	7.15541	6.32116
1	4.186	17.4289	13.0672	10.8882	16.8932
1	1	5.87466	6.67631	2.64554	1.79571
1	1.5	6.17954	6.48945	4.05664	8.99387
1	0.91	4.90159	3.43487	2.03094	2.02599
1	1.2	3.94874	4.62307	2.02902	3.17378
1	7.106	28.6958	86.7145	44.222	44.268
1	2.925	8.10239	14.1766	13.4241	23.6486
1	24.64	17.0249	28.6224	10.1643	17.7195
1	45	23.9327	25.5828	8.56525	34.6596
1	90	12.7224	16.6657	19.1253	14.2675
1	16.5	11.2569	24.4926	15.2549	18.2204
2	16.016	28.2236	41.5295	41.5989	35.8448
2	1.56	6.28796	11.524	18.8937	15.3814
2	22.5	4.35926	5.37072	10.3631	8.48579
2	2.4	7.39885	4.1219	5.50527	7.57559
2	6.422	14.6253	19.2745	11.5323	34.5067
2	4.8	5.09106	6.72443	1.75116	2.91938
2	0.027	12.9699	14.3817	27.104	27.884
2	5.1	17.238	14.9052	16.2564	25.6453
2	15	19.0639	20.2959	10.1006	7.36354
2	5.6	20.7477	27.2687	18.1362	32.8448
2	0.616	6.81785	9.38674	3.00798	2.89509
2	0.539	9.77022	13.0193	6.68574	9.81473
2	18.85	10.4944	10.6461	13.559	6.70051
2	4.05	13.5741	23.1048	17.1489	12.8365
2	18.75	11.9417	17.8701	8.34912	5.54911
2	4.356	12.1343	15.3613	7.93104	10.3951
2	23.4	16.3212	20.2982	19.614	11.7776
2	5.76	13.7988	6.94329	5.38866	4.69544
2	0.616	4.98158	3.0965	0.755783	1.55504
2	34.684	10.8897	6.34509	4.52168	5.37436
2	2.56	18.1367	34.265	59.1926	15.3056
2	12.65	4.38873	4.31151	4.2754	1.84061
2	9.66	12.1454	9.60703	8.21662	8.38579
2	1.1	3.63855	2.26311	0.575232	1.27737
2	0.42	5.5276	8.09856	2.29265	3.77883
2	0.06	3.50653	5.9576	1.0859	3.13786
2	5.616	4.53551	3.7122	1.09752	0.799728
2	1.352	3.04157	4.57291	1.79089	1.24293
2	3.536	7.7308	7.32281	6.09589	6.63611
2	0.15	10.5536	8.41242	1.52169	5.63706
2	46.494	9.32116	13.9448	12.427	17.2505
2	1.7	7.85332	13.5436	24.8201	22.6816
2	36.75	12.4585	17.6937	22.9605	44.329
2	18	23.6706	54.7475	47.4773	32.564
2	21.78	27.5989	55.7424	42.4059	44.0613
2	27	14.1362	17.9618	13.0934	11.6156
2	2.85	7.54514	7.64154	6.33257	7.62111
2	6.375	16.6634	12.092	5.3412	24.6296
2	19.8	9.22	6.62038	10.9967	12.6178
2	21.504	19.2484	28.9609	41.0588	25.3333
2	160	22.4557	40.3676	42.9251	31.1748
2	7.65	19.9268	34.0056	29.458	21.2937
2	25.6	21.8948	44.1043	62.1286	58.7133
2	4.004	8.18158	4.83766	3.46614	8.83138
2	3.375	9.67557	10.8717	5.2866	6.86482
2	1.1	7.90199	5.06159	1.05549	0.356396
2	16.32	12.7756	10.9316	7.08419	3.21494
2	15.75	12.9981	13.5798	7.53477	18.3362
2	1.573	10.473	11.565	7.1881	8.84987
2	37.296	13.9235	18.2645	13.7603	30.8397
2	14.04	15.7055	38.2484	4.0797	2.8843
2	7.056	10.5094	14.3835	12.4537	10.288
2	0.24	9.21931	8.88721	16.5149	13.8338
2	8.526	12.8303	16.8787	16.1339	10.1114
2	4.05	10.9246	8.38972	5.99365	3.39688
2	13.728	27.542	27.1338	43.6495	28.641
2	4.914	6.50834	5.88219	0.850574	9.1631
2	1.2	13.0514	9.74986	11.0219	3.36763
2	0.924	6.32966	4.84132	4.55444	1.61756
2	11.4	15.3793	10.8937	7.37745	1.11578
2	11.718	24.6962	43.2667	32.3174	49.9464
2	1.573	11.7154	16.8594	11.0729	9.29906
2	31.5	11.6478	19.3664	7.62126	5.8668
2	0.12	10.088	10.2388	16.5835	5.3824
2	1.44	14.1549	22.6101	33.3864	29.7626
2	4.5	16.2232	14.2913	14.3818	13.0713
2	45	18.8429	34.877	39.0972	35.6287
2	10	13.1635	24.4825	9.90127	4.22244
2	36.4	16.7886	22.6127	19.5757	11.5593
2	24.192	5.64661	4.29088	3.91879	2.80511
2	2.652	7.25965	6.62852	4.17262	1.45548
2	0.729	5.79461	4.07931	0.120821	0.212234
2	4.725	17.5766	34.2435	24.3915	26.9317
2	256	23.6718	34.2129	16.4346	41.5682
2	11.25	11.2323	16.1889	19.7906	11.743
2	40	8.16773	10.6402	6.88941	9.99212
2	1.632	13.3234	13.5406	5.5286	15.3306
2	3.536	8.4586	9.7866	6.53795	6.91322
2	45	21.5288	20.3211	12.4528	22.5036
2	10.35	18.3948	26.7331	20.3426	25.893
3	59.15	18.6819	28.7938	19.4598	19.8164
3	1.56	7.4921	10.419	15.7003	10.578
3	4.608	10.2294	20.0975	12.5469	14.0043
3	151.05	31.1581	41.3096	30.4159	44.4335
3	11.988	12.5263	10.8469	12.9067	13.8517
3	1.078	5.86309	10.3204	2.64893	3.00953
3	0.45	7.60314	8.60574	5.69924	10.0891
3	52.5	14.9606	14.305	9.64102	8.2076
3	46.656	34.1177	28.4318	48.3765	46.2394
3	6.864	16.2604	30.342	19.5057	16.9995
3	4.335	4.31034	6.48031	6.28058	5.42187
3	15	17.9764	19.1241	14.1552	23.8024
3	0.539	13.3911	24.2589	19.4051	20.7759
3	0.616	4.56794	7.41404	1.39125	2.21308
3	34.684	9.16849	8.27183	3.17497	5.92157
3	34.3	10.8623	11.0791	10.8486	9.98296
3	12.65	6.86431	6.04279	3.96606	2.54033
3	0.546	16.3302	24.3815	9.04845	13.603
3	7.182	10.332	21.4739	4.22205	13.4761
3	0.64	10.3875	10.0608	9.74023	7.31635
3	0.06	3.68308	12.9971	2.26352	4.80099
3	5.616	4.82525	6.65367	2.81668	4.32701
3	1.352	4.04325	13.0483	3.77586	4.77712
3	3.5	7.61968	17.3471	6.89548	13.5953
3	67.5	13.1718	25.8814	16.5241	16.8955
3	15	8.40537	13.5132	5.58717	10.2967
3	30.625	11.5651	11.6131	13.9144	9.37092
3	70	14.0704	19.6992	9.67912	20.2169
3	27	14.1126	32.0856	17.1396	12.6845
3	90.24	12.8542	26.0068	18.4041	23.3461
3	6.375	14.2606	16.5467	9.28861	22.0438
3	20.25	6.23733	14.3572	4.57366	8.73467
3	2	20.8755	29.3115	19.0307	20.9528
3	4.08	9.75113	18.4601	17.7056	8.77789
3	54	11.3744	24.8311	9.105	15.7341
3	25.6	16.9641	34.0563	23.1197	14.6238
3	7.2	10.1576	28.0363	7.57535	21.3665
3	1.144	8.03373	16.3753	8.84197	10.3054
3	1.1	8.01646	8.95401	2.60135	4.05279
3	31.5	10.4206	9.54238	11.8187	15.884
3	1.573	13.1357	15.5823	6.69082	7.55366
3	3.375	9.61427	24.3931	15.6815	19.9601
3	5.865	11.8292	22.3533	22.55	11.0869
3	10.35	15.7856	17.6659	7.5356	10.0672
3	4.05	11.6849	17.9525	12.5417	13.4601
3	0.539	14.3854	22.2171	24.1166	22.5032
3	12.844	23.7697	36.9506	18.4686	38.3621
3	4.185	9.99368	17.137	10.2786	19.0272
3	1.26	3.96792	6.33643	2.966	1.70908
3	4.56	13.2241	7.60582	8.2705	8.07417
3	3.96	21.8763	33.6499	38.7818	54.6981
3	1.573	10.9902	21.7217	10.8551	10.409
3	6.3	15.1951	22.2859	13.6696	23.0499
3	2.184	21.6225	43.163	25.0613	41.6256
3	1.485	5.34282	11.2086	6.48668	3.84195
3	15.75	23.2699	21.8083	30.5902	33.2925
3	5.168	16.3771	20.4047	15.9952	18.5636
3	1.716	6.41404	8.3156	4.87419	4.86288
3	32.4	28.8147	33.7565	26.0651	48.1044
3	10	10.8559	14.3789	10.8796	10.2905
3	4.5	19.6036	36.22	22.286	31.3074
3	9.375	11.8314	8.74635	8.51279	12.2142
3	27.84	12.458	28.2133	8.45395	20.0398
3	0.24	13.1935	29.1404	6.42809	10.7502
3	17.6	12.9214	17.8433	9.49052	19.578
3	24.75	9.38581	14.7635	8.52484	6.83744
3	31.5	6.96414	9.89794	9.61957	10.8959
3	30.375	25.1112	33.4532	29.5884	38.477
3	11.88	12.7673	17.7969	12.5747	18.114
3	7.038	7.74669	10.7802	8.19949	7.42984
3	7.7	8.43105	27.6253	21.6556	18.882
3	1.5	6.59139	12.3481	5.45715	7.64833
3	1.785	8.72101	14.2274	6.51622	10.329
3	40	6.76111	12.6683	12.1963	9.99987
3	8	6.49833	11.8414	4.12963	7.90623
3	3	19.4924	32.7923	33.6098	35.3632
3	2.925	10.6268	16.4171	20.549	17.5697
3	1.21	6.50129	12.7733	12.2024	10.782
3	17.28	17.9167	21.4389	7.78668	14.2811
3	207.46	17.3655	40.253	30.7497	33.4478
4	23.328	8.26734	7.49873	3.59029	2.37141
4	48.125	13.8402	38.5549	47.2433	14.8788
4	2.4	8.38366	3.81467	9.89556	6.87499
4	24.48	10.5114	3.8411	4.24467	4.48142
4	6.422	10.7503	11.7787	8.07014	14.8948
4	4.8	4.21692	1.21266	1.54959	0.678481
4	2.145	4.4325	2.86893	9.20829	6.01965
4	3.375	8.43793	8.42323	15.5769	12.5803
4	5.1	24.6473	17.2902	17.9796	19.8435
4	61.152	6.52268	3.11487	4.57643	1.94322
4	9.044	23.9075	41.1816	61.757	41.7583
4	6.696	7.9862	2.81834	6.54689	0.648615
4	90	22.4841	9.67049	10.3753	9.3349
4	143	7.08322	8.43934	1.92202	5.78306
4	10	16.4407	8.21945	10.7094	7.60826
4	0.014	9.81029	9.69879	6.65795	2.29945
4	4.356	11.21	18.5381	14.6621	13.991
4	1.8	12.0628	6.61384	9.04944	13.2068
4	34.684	9.05322	3.7021	5.76592	8.33069
4	10.92	14.398	17.997	21.3868	10.0249
4	34.3	10.168	12.7252	12.9732	16.7389
4	0.704	6.29615	2.684	3.18868	3.90728
4	1.5	5.64906	6.13165	5.57478	6.07854
4	1.1	3.68037	1.05773	1.89398	3.83428
4	0.288	5.09092	2.04083	0.715834	3.76801
4	0.06	3.23328	3.25245	1.78364	4.59099
4	2.16	7.19625	9.64219	2.41457	16.5347
4	3.5	11.3781	10.6817	5.54969	11.4673
4	2.7	8.30736	7.1713	9.2147	10.9817
4	0.225	6.54748	10.897	14.9591	12.0394
4	0.36	6.85592	1.7806	4.06411	0.869072
4	24.75	15.4055	29.5762	31.0789	17.6323
4	1.683	6.17664	10.0612	6.99051	9.19441
4	3.6	7.56269	10.6558	32.9849	7.43198
4	15	12.8818	9.30796	6.22152	10.1263
4	24	24.7302	50.2404	48.2256	44.1106
4	18	26.8206	98.3447	132.888	112.814
4	31.35	10.8642	7.7002	8.17793	12.0527
4	96.25	18.4672	36.0776	49.3732	52.4697
4	4.08	13.4608	21.5843	39.3278	15.2338
4	132	25.9344	49.192	98.3676	54.1958
4	18.375	7.50815	6.82517	12.4332	4.52018
4	34.2	8.8284	10.6533	15.5786	10.0978
4	25.6	16.0894	38.6611	40.6122	17.0575
4	11.2	16.836	29.2958	15.7112	24.4379
4	20.16	12.2054	8.19275	7.05562	9.49921
4	1.232	7.04576	9.528	18.873	12.0759
4	4.05	7.41314	4.16314	7.24104	9.59746
4	240	22.7427	49.9629	50.3064	56.8626
4	1.573	9.93635	15.4598	9.83098	11.1571
4	4.05	9.61236	7.87276	9.67697	10.6559
4	29.484	6.96771	11.8736	16.6373	9.47838
4	19.04	6.45612	4.78185	10.3228	9.14409
4	1.26	4.95214	1.2174	0.330213	0.025218
4	6.44	12.4644	11.5407	7.5428	6.77699
4	12.42	10.1821	9.5858	2.82345	5.71582
4	0.924	7.14494	8.59305	8.46812	8.78369
4	59.532	36.2494	25.9475	24.4477	23.9019
4	11.52	13.6701	19.0338	39.3992	9.54872
4	4.224	10.7937	1.62026	1.1415	1.13831
4	2.184	19.9744	37.3567	49.3783	38.0393
4	15.75	19.6427	21.7105	20.2347	21.8755
4	6.48	10.038	6.91247	6.02151	13.1224
4	6.9	14.8261	13.0552	4.71459	6.64444
4	0.234	18.7515	17.1576	11.0075	11.1499
4	1.44	9.38568	23.9795	26.9079	25.8188
4	22.5	7.72355	3.52946	1.1119	5.29903
4	17.6	11.32	18.6221	18.9891	15.9708
4	48	3.77503	0.419782	0.174433	0.0784469
4	21	5.36521	48.9844	6.66184	2.37427
4	2.142	6.91638	2.84418	1.12836	2.7352
4	4.186	18.6813	9.28688	2.02474	5.41733
4	2.652	8.30616	4.1603	8.66957	7.15851
4	1.785	8.61692	4.82218	7.40679	9.01771
4	0.91	6.09634	3.20244	1.60127	3.57627
4	10.8	9.29955	15.5601	22.5233	15.6445
4	18.9	12.2928	23.8326	13.7317	13.2171
4	1.2	5.10694	4.93809	8.10536	3.16433
4	10.35	18.9227	40.6874	41.4655	70.3926
4	396	11.7006	12.8991	10.3879	18.878
5	59.15	19.6239	28.3569	16.4421	16.2455
5	151.05	24.6293	33.7411	29.6472	31.7351
5	11.988	10.227	22.5274	9.9768	13.2825
5	2.52	16.2725	57.4564	34.834	21.8543
5	0.81	14.2203	11.8294	8.63162	12.4132
5	1.5	7.45948	10.5961	8.80605	6.82059
5	20	17.3251	33.6525	38.1902	35.6648
5	4.335	4.90105	6.81726	5.40246	4.46222
5	15	17.6317	10.3477	11.7355	19.6962
5	148.5	48.1593	26.6188	50.7241	55.8788
5	11.55	10.8989	10.4294	9.69427	9.50184
5	6.696	9.54191	8.94618	13.4172	3.37882
5	90	20.693	6.74417	5.94184	8.93298
5	5.508	13.5822	21.8067	21.1586	21.557
5	143	5.98346	9.09728	3.27596	3.01668
5	3.96	9.3384	7.96148	5.70273	14.3315
5	6.804	15.8779	29.4258	18.3478	31.1738
5	5.76	12.9585	3.81282	7.42775	5.44407
5	0.616	3.66361	0.639524	0.266826	1.10871
5	17.34	8.05264	9.08429	7.57531	7.11745
5	3.264	3.90545	1.83521	2.70708	2.2993
5	2.56	15.2318	26.6782	19.6994	7.52605
5	1.5	5.35822	5.14631	3.28822	6.26069
5	2.16	5.97547	6.09926	4.02053	10.4234
5	38.5	13.433	19.065	12.6509	17.8055
5	3.536	6.27987	4.30194	2.79697	2.95253
5	0.56	10.5435	5.94964	6.1675	7.56653
5	0.528	6.54208	4.49228	4.73454	4.13333
5	2.64	5.72228	3.4606	5.28661	6.00216
5	0.36	9.55957	3.45867	6.33567	3.93515
5	24.75	17.139	26.2366	29.2242	16.8429
5	1.683	5.32356	6.21881	5.00599	6.67751
5	1.7	7.33749	16.0421	15.0894	20.5326
5	2.535	14.309	16.2924	21.859	12.5965
5	36.75	12.2116	33.3104	31.1986	34.0854
5	21.78	25.8468	57.4944	43.0401	48.7308
5	16.128	22.3002	53.6829	38.5087	36.6171
5	96.25	18.5302	39.1867	61.684	51.7037
5	6.375	13.7622	10.5395	10.483	27.7896
5	20.25	7.35533	7.3436	5.76768	10.8558
5	13.26	13.85	17.3759	15.0897	19.0543
5	1.144	8.69216	12.4324	12.4421	11.0978
5	4.8	10.112	7.91546	16.3241	15.6043
5	57.46	15.279	28.4383	31.9879	25.0689
5	0.704	8.88579	7.08527	3.39767	5.59455
5	37.296	14.3601	28.689	23.5089	34.2931
5	108	27.3058	37.548	34.1647	19.8345
5	8.526	12.3535	13.4867	12.6772	12.3756
5	29.484	7.46365	8.80594	5.5154	7.86183
5	1.56	10.5035	14.5571	17.0378	9.35194
5	12.844	17.7558	25.6604	12.9113	16.1683
5	26.04	18.4869	11.5393	19.2221	13.6481
5	1.485	6.53034	5.10627	6.99419	6.98696
5	76.755	16.1753	25.739	34.1338	26.1755
5	1.716	6.7145	7.80162	4.69783	3.79634
5	3.6	13.0574	17.9576	16.7387	17.3789
5	39.75	7.99427	3.34237	2.45998	3.75844
5	4.875	6.30417	2.06432	2.78703	2.99001
5	9	6.9843	3.56204	4.08562	4.59135
5	1.4	9.78063	11.0353	10.5764	7.38885
5	27.84	14.1891	29.6108	7.87471	9.6787
5	7.5	6.12259	2.83909	2.46741	7.58122
5	18	9.17124	10.714	11.2218	5.93402
5	10	14.5279	12.7496	8.19091	12.3651
5	21	4.77569	57.2609	9.01194	3.16998
5	24.75	12.997	13.685	16.2683	10.1233
5	26.25	10.0749	13.3893	16.2577	14.8042
5	36.4	15.2134	17.8504	24.4074	12.812
5	7.038	9.45124	14.8752	8.84981	8.66411
5	49.5	29.2693	35.8316	34.4227	44.6366
5	4.186	16.5176	10.7073	8.65599	12.0628
5	4.725	16.6439	51.1276	23.4895	34.2749
5	1.5	6.20439	6.77516	5.11439	10.638
5	10.8	7.80008	17.5126	15.7685	21.309
5	1.8	7.2043	2.71455	2.0583	1.6587
5	3.536	8.45991	9.50874	6.94576	11.0178
5	14.144	15.7802	4.80568	4.5479	11.3543
5	24.64	14.6996	24.9817	20.3779	18.8292
5	90	12.6932	18.9326	16.659	13.8167
5	14.56	12.855	21.5232	28.2924	12.3521
6	16.016	23.8822	33.562	55.6376	41.5261
6	1.56	6.20998	16.199	13.6839	17.1525
6	60	7.38922	9.78815	8.8649	10.9561
6	1.078	4.55256	4.95208	1.27766	2.5114
6	24.48	9.81685	7.0301	7.94004	4.34885
6	24.3	8.67813	8.57653	5.77589	3.19016
6	2.52	15.8435	53.2868	17.4088	19.4455
6	0.125	11.6112	11.974	5.90758	22.5316
6	3	9.10349	8.28436	4.67136	6.19167
6	21.924	16.1717	27.7188	46.3586	29.0286
6	27.72	18.3627	10.0176	8.00841	6.2651
6	148.5	44.609	47.7929	82.6332	43.3896
6	9.216	16.1488	24.1744	20.3174	4.84113
6	0.539	11.8921	11.0138	8.09817	12.8876
6	3.36	35.9228	38.9754	31.1864	36.065
6	3.96	10.2428	12.1994	5.28603	19.028
6	2.25	16.175	15.9393	21.4252	6.21874
6	18.85	12.9377	19.4045	18.2219	8.96252
6	0.014	8.67207	10.7906	9.06684	1.28516
6	0.216	5.48403	8.60899	7.58433	22.8989
6	0.832	8.12065	6.8026	7.06562	19.7377
6	2.34	15.8852	22.9341	27.6963	12.2937
6	5.04	12.2785	34.2906	47.4453	38.5907
6	0.64	9.12263	10.2792	10.0485	4.62351
6	1	6.51924	5.08156	2.92329	3.69727
6	1.683	7.1064	9.98318	7.83151	8.61099
6	15	9.81716	5.40035	3.03312	3.91537
6	31.35	14.2812	16.7665	17.7641	14.7674
6	8	8.43876	12.3215	17.9378	7.42359
6	2.85	8.43546	10.7844	12.9154	10.221
6	58.5	14.5773	27.9302	19.5856	21.7581
6	4.08	13.4307	15.0815	24.8463	16.3444
6	7.65	19.4751	24.0122	24.1311	37.7691
6	34.2	10.2248	12.8568	18.839	18.5475
6	25.6	19.3204	35.5434	20.7592	8.15806
6	91.143	17.8318	14.0751	16.0177	13.9372
6	20.16	12.6156	6.07503	7.82551	16.4268
6	20.25	7.75518	14.6639	14.6557	14.5455
6	1.44	12.4242	17.7655	22.0434	21.0038
6	24.48	10.5465	9.32542	12.705	8.94829
6	31.5	11.4095	10.86	7.03294	11.0152
6	240	18.7437	41.5779	26.6729	22.0612
6	7.056	12.7371	14.7028	13.4362	15.8605
6	0.24	9.76448	9.37383	8.6116	8.02123
6	51.84	16.3956	13.2376	19.6769	9.40763
6	1.56	12.8537	15.8202	19.618	11.5764
6	12.844	25.1327	20.2096	13.8103	24.6195
6	1.26	4.81372	4.47904	4.98149	2.24824
6	4.56	14.3079	11.8177	11.2837	8.52494
6	24.192	13.2875	15.5548	14.2862	4.20174
6	1.17	7.59606	3.62305	3.79096	9.20048
6	3.96	17.6388	38.5434	38.8677	64.6426
6	59.94	22.4305	33.805	17.7035	18.7435
6	6.3	11.9759	8.52374	3.73201	17.1953
6	21.384	10.7217	7.94606	6.1351	7.56946
6	10.868	15.9288	13.6732	11.3122	12.2817
6	15.75	16.4972	25.2976	22.2775	31.9777
6	76.755	15.6624	25.857	37.0304	42.4732
6	11.25	15.1013	22.679	21.2131	24.3093
6	6.9	20.5063	18.1353	7.52477	15.6007
6	0.234	13.1032	15.5351	10.0182	20.8176
6	4.5	13.1061	9.32154	7.12785	9.9302
6	18.75	16.0403	10.498	5.38945	2.18617
6	5.85	11.3309	21.5184	15.6342	43.9311
6	19.2	11.4511	9.71135	7.36411	15.5999
6	100	21.5915	22.0744	13.9968	21.5512
6	38.72	13.267	17.0837	15.7802	14.7137
6	21	6.34031	53.1607	7.42366	3.13344
6	24.75	13.7393	11.6524	16.4748	5.41471
6	24.192	5.66932	2.26043	2.4249	0.420264
6	1	6.13449	4.32138	1.19437	0.282209
6	7.7	9.25575	45.307	22.536	21.6313
6	12	13.8678	18.3027	22.6276	19.2683
6	256	27.3222	30.8336	22.4201	68.6733
6	8	5.4693	6.989	3.44046	5.84978
6	1.632	11.4706	14.7913	11.7527	26.869
6	1.8	7.54382	3.71765	3.92331	0.50077
6	14.144	17.3042	9.85552	12.1006	28.6144
6	45	18.1226	22.0326	20.3743	38.0034
6	90	12.5033	16.6388	12.6586	13.9515
7	31.5	14.3657	16.9306	20.8534	15.8307
7	7.5	17.8352	9.54194	23.4096	17.7041
7	0.45	9.03261	4.99693	2.33969	6.04428
7	52.5	13.3035	11.1846	7.61663	10.7761
7	47.25	16.3403	14.0572	30.0792	38.2828
7	9.36	25.8374	28.9835	16.1005	20.9126
7	6.422	14.2887	15.6381	14.6593	14.5839
7	2.145	4.53062	7.36676	18.7687	4.97382
7	10.12	12.4087	11.3858	4.49234	9.84763
7	36	11.0922	10.9751	14.8235	15.3295
7	1.5	6.14333	5.79598	9.07155	9.80275
7	16	7.25487	16.1	10.0687	12.9496
7	20	16.6167	28.4744	24.9161	36.8066
7	3.84	5.64782	9.12794	3.03432	5.88453
7	11.55	11.3261	13.0789	11.6102	14.3491
7	90	26.7806	26.069	15.9652	15.3765
7	4.05	13.5173	19.5599	33.2092	26.3732
7	10	13.6911	14.654	9.89663	12.4739
7	18.75	7.73331	19.965	12.0663	10.471
7	0.21	10.7652	9.8575	1.58486	4.82401
7	1.56	7.36177	14.4628	11.8126	6.49323
7	0.216	4.75382	8.07056	4.80535	6.45314
7	27	4.96043	5.05187	2.34041	4.06183
7	12.65	4.29391	5.35676	3.395	1.17668
7	0.936	6.84359	11.1518	1.15714	3.98941
7	5.04	10.9751	20.6219	23.8137	14.1117
7	0.252	6.93898	7.50019	4.43053	4.99062
7	2.16	5.1374	7.96664	4.08567	3.90938
7	0.288	5.71138	4.10598	2.375	5.49559
7	1.848	4.45638	10.2492	3.92417	8.33468
7	3.5	8.06999	16.0881	3.2662	15.3461
7	38.5	13.9551	26.145	17.3735	18.2724
7	16.2	12.2697	19.3355	25.0708	16.6587
7	0.462	9.20717	14.0432	10.3102	6.80858
7	11.25	9.13444	20.2452	9.96088	22.0757
7	1.35	11.8556	33.1184	10.6466	7.12624
7	96.25	19.5003	36.9255	87.5911	65.0575
7	0.81	24.1013	21.9081	32.4914	32.643
7	54	8.01505	15.0495	6.09382	8.95864
7	7.65	16.5416	40.2497	89.7478	23.4399
7	45	5.69266	3.68067	1.69445	3.25622
7	1.144	7.36572	15.8704	17.5056	12.8754
7	1.44	15.1042	17.5796	14.6896	13.15
7	4.8	9.17094	7.07457	17.8064	19.3386
7	11.25	33.8755	27.015	46.1894	35.2604
7	31.5	11.7039	11.0567	14.4953	21.1724
7	5.67	13.1455	14.0206	6.83022	7.04484
7	3.375	9.23075	23.5775	26.0244	5.94106
7	57.46	14.9564	24.5024	32.5631	30.2158
7	0.24	9.8852	6.82668	5.95741	9.4991
7	269.568	31.9346	39.3914	72.7039	69.4761
7	8.526	13.0504	16.6992	13.6638	15.8888
7	1.56	11.7409	16.2816	10.0032	14.0579
7	5.04	6.04631	9.3647	8.35399	1.26406
7	1.2	9.25764	10.796	2.8633	6.89739
7	79.9	9.31109	13.5668	4.51754	12.9766
7	59.94	26.1342	29.3337	21.3425	41.3746
7	6.656	13.4598	16.6206	22.6376	21.3235
7	31.5	10.0709	27.241	16.6837	10.4473
7	9.2	22.3762	18.7089	35.7977	21.5074
7	9	8.8018	7.81476	11.855	6.82815
7	39.75	7.68531	10.5415	1.89728	4.54499
7	59.4	12.4034	14.7434	7.48039	15.2885
7	9.375	9.09904	8.17395	5.83483	14.3179
7	19.2	8.91446	10.1004	1.63126	5.69341
7	6.75	10.2733	12.1152	10.0801	10.3132
7	18	8.65631	10.3656	6.31113	8.46723
7	10	9.70215	12.1087	7.31113	6.78773
7	31.5	8.41409	10.305	10.2626	11.9397
7	11.88	15.9282	17.1316	15.7998	16.5311
7	0.729	4.61196	9.43465	0.904411	0.516047
7	4.725	17.289	30.2378	22.8545	35.0738
7	7.7	9.44848	35.383	45.9193	24.4875
7	12	13.106	15.5808	9.62327	10.4638
7	0.91	3.94494	9.52057	1.64672	1.92423
7	8	7.81215	15.8746	19.2559	17.2367
7	3	17.336	23.1448	13.8831	15.3542
7	3.536	7.42166	19.2342	12.521	9.6764
7	14.144	13.671	17.0568	4.27983	19.7416
7	45	20.421	23.6028	22.3346	16.8981
8	16.016	30.9885	39.1779	44.399	29.9411
8	4.608	10.2495	14.9052	12.9023	15.8345
8	31.5	13.3118	16.0366	16.7165	14.2017
8	1.078	6.98605	10.2485	5.4777	6.52584
8	2.52	15.0678	50.5341	17.9279	11.1623
8	7.225	17.1284	22.3388	16.6363	16.4988
8	6.422	13.7333	13.674	12.9202	8.16553
8	3.375	9.33627	17.1336	9.22898	18.9918
8	10.12	13.5114	15.1584	10.7723	15.3024
8	16	10.7219	14.6553	15.8054	19.7912
8	5.1	24.8629	17.7876	9.29553	21.3721
8	4.335	4.51641	5.12354	10.4159	6.07283
8	9.044	25.6794	34.1446	45.0933	31.481
8	143	7.3586	7.9554	4.99871	8.56015
8	2.25	14.5595	16.2683	20.8391	17.6677
8	18.85	8.30788	8.24953	10.0182	16.1716
8	10	14.9135	11.7407	14.0023	18.4461
8	13.2	7.04859	8.03684	4.50922	6.6596
8	1.56	7.45008	7.79146	4.8531	9.77051
8	0.216	6.02605	4.6377	3.69179	6.40776
8	0.616	3.87941	1.8197	1.04754	5.1656
8	0.936	5.36817	5.22354	2.22943	11.0119
8	0.9	4.44609	3.32944	2.87447	8.32131
8	5.04	13.7161	22.9227	16.8823	21.2984
8	0.504	8.14332	14.5661	11.8387	19.9083
8	1.352	3.00864	6.3705	7.1799	12.2549
8	5.94	15.9039	16.9128	15.0474	20.6265
8	3.5	11.4709	14.0546	8.90269	22.0913
8	0.36	6.89365	2.3629	3.18245	3.02817
8	0.432	3.93754	5.38133	2.86229	7.51484
8	1.35	9.27288	39.4463	12.4307	4.89818
8	1.683	5.53226	8.83961	6.16567	13.2414
8	7.14	7.03422	7.17345	6.40002	11.2559
8	70	13.5576	21.481	14.1027	26.8296
8	31.35	10.2254	13.7037	13.3822	16.8962
8	43.75	12.1273	14.612	23.2297	18.8708
8	2.85	6.27254	4.98602	6.60035	3.42917
8	19.8	6.87486	5.17015	4.44333	6.20817
8	18.9	6.07041	4.40588	4.6817	7.94695
8	33.75	13.457	19.3035	17.6518	18.0011
8	33.06	11.2234	11.3172	10.6402	9.41871
8	4.004	8.80013	7.09029	5.74078	11.4615
8	5.5	27.892	12.0567	28.2975	28.5134
8	6.552	8.11675	5.85018	5.47619	8.29766
8	4.95	14.7791	8.69724	8.85183	22.4544
8	20.25	9.38107	16.8722	22.0538	18.2862
8	1.1	6.49332	6.32664	6.81936	5.59348
8	240	22.0104	48.2407	55.8071	29.7601
8	24.3	6.9731	7.47492	9.3192	10.0163
8	8.526	13.0187	18.7369	13.8296	19.1706
8	45.92	11.3811	16.5837	8.62391	12.7861
8	5.04	5.83557	2.33641	1.47592	5.10617
8	1.2	12.3999	11.1672	8.63627	12.1674
8	12.42	11.493	15.517	7.11573	13.9443
8	26.04	18.0938	22.9002	22.9271	23.4467
8	5.168	13.31	15.3927	9.81041	21.4992
8	3.808	18.8051	15.9106	12.7733	21.7013
8	32.4	38.8375	44.6378	52.388	47.947
8	10	10.0198	9.48203	12.2763	13.1322
8	6.9	13.7144	20.2028	11.78	26.0815
8	4.576	12.1114	4.79287	4.09844	14.0555
8	0.234	17.3792	24.6552	17.3518	23.2098
8	1.44	11.2119	13.9153	15.5941	16.5309
8	45	17.8585	28.2638	31.6121	16.0031
8	9	6.46962	3.36059	3.86325	5.27933
8	5.85	10.9972	18.9423	19.3709	19.2659
8	38.72	15.3068	13.896	17.483	18.9068
8	24.75	13.805	15.0337	12.3781	14.0342
8	8.4	12.9135	14.9846	13.915	25.5484
8	26.25	10.246	11.905	14.1545	11.0315
8	2.142	7.10175	5.69696	3.39376	10.2343
8	24.192	5.61769	3.29263	5.62821	6.12947
8	0.816	6.23471	9.26948	8.42127	12.1675
8	3.57	16.4311	50.9583	22.2371	8.4441
8	37.625	15.8021	17.5027	14.7384	22.0465
8	11.25	11.4925	13.4304	18.3224	12.4746
8	8	6.90613	11.3164	7.98258	14.8306
8	1.56	7.12352	9.33744	10.3978	9.78073
8	17.28	17.9826	19.6499	8.91153	15.0345
8	14.56	14.4001	27.8587	20.3997	21.1116
9	1.56	5.8953	17.4728	13.8298	10.0957
9	7.644	22.1782	26.7486	33.4538	12.8832
9	8.84	10.1958	10.1477	10.8629	16.2677
9	4.608	7.79034	12.7194	5.64948	5.97601
9	11.988	13.723	28.3994	19.0669	21.595
9	23.328	6.62736	10.945	4.93386	4.92415
9	47.25	16.9297	37.739	36.4206	19.6834
9	9.36	26.7419	27.8602	18.7274	15.3881
9	6.422	13.5747	21.1398	13.6587	8.45071
9	46.656	26.9702	20.1062	28.1817	25.8333
9	1.5	5.81253	5.51331	6.08389	4.28609
9	20	19.385	44.8905	47.1701	59.8955
9	6.864	16.3771	24.3959	28.9525	27.1442
9	5.1	19.6014	16.5033	12.854	13.8323
9	9.044	20.5331	31.6041	27.2416	43.0988
9	90	26.8553	4.99196	8.60769	18.7384
9	13.05	7.29807	7.1647	7.6478	2.83593
9	0.216	4.55345	5.03321	6.17062	6.40954
9	5.76	11.6244	1.52374	2.45866	10.5105
9	0.336	4.40533	5.3756	3.32542	4.42023
9	2.34	15.4476	29.2357	29.7545	15.8035
9	1.1	3.63198	0.311431	0.817427	2.06682
9	0.288	4.83119	1.12652	1.66519	4.96688
9	1.848	3.64192	3.33961	3.18044	7.34666
9	5.94	8.43711	10.3619	14.443	13.9847
9	3.5	6.98826	7.42567	2.84726	11.3894
9	38.5	15.3172	21.7955	17.0307	23.0515
9	3.536	6.15283	3.73075	3.20789	4.77795
9	16.2	9.94678	16.2655	14.7157	9.60211
9	0.462	11.1514	11.0489	10.3083	7.42749
9	11.25	7.72128	11.5257	7.31384	19.2357
9	67.5	13.3429	22.2605	21.5528	20.8834
9	2.25	6.62068	5.19342	1.45348	2.30755
9	30.625	11.4261	17.3127	10.3611	9.06771
9	70	17.7584	37.3738	23.1913	45.1953
9	31.35	13.0408	15.2952	16.1564	16.5312
9	15.84	12.7266	14.8596	10.3017	12.3984
9	48	18.7167	28.5047	29.8868	38.9049
9	6	9.466	7.82863	18.1365	10.6616
9	6.375	13.4425	6.92768	3.49169	14.2773
9	2	21.3886	9.34305	12.3302	14.715
9	33.06	8.78246	7.93963	12.0989	5.09729
9	7.65	20.6228	25.9466	86.9657	63.7186
9	54	14.2012	21.2792	17.4855	15.6294
9	34.2	9.02388	7.47917	17.093	9.40192
9	25.6	22.7754	49.9185	21.2477	15.1166
9	21.6	16.1206	19.3819	7.70523	16.0864
9	16.32	13.9529	6.30955	5.00005	10.3751
9	11.25	37.8879	31.9307	46.0859	35.4958
9	5.67	14.2037	17.5488	13.6038	10.0315
9	57.46	12.223	18.0927	15.3423	21.0806
9	6.93	12.5929	34.1547	12.2153	13.4788
9	0.24	8.54739	11.71	4.58871	26.7228
9	4.05	10.6819	10.3759	4.48147	7.19492
9	1.26	4.74111	2.5219	1.52689	0.257197
9	1.2	9.50382	10.9434	2.29485	5.52606
9	11.4	13.8243	6.4007	3.00638	1.78449
9	11.718	26.8894	40.2976	15.0954	46.2827
9	79.9	10.3243	8.10785	4.81932	11.8243
9	1.573	10.2903	10.7851	11.1553	14.2741
9	6.656	12.1292	10.9954	20.7337	16.6982
9	1.716	5.71081	11.4815	9.49536	8.4028
9	10	9.48562	8.10846	5.07966	7.05402
9	4.5	17.554	14.3581	18.4602	14.7952
9	39.75	8.23122	5.90056	2.01153	4.93455
9	59.4	11.8663	7.87401	4.55554	9.75562
9	4.875	5.29023	1.54279	1.38449	1.65928
9	100	19.8867	19.7801	17.8911	21.8353
9	7.5	5.58234	1.45647	1.04365	3.88923
9	97.5	18.5847	46.3232	47.5415	20.895
9	26.25	9.17512	11.4555	15.8219	8.19628
9	11.88	12.0655	10.6123	12.8847	8.30856
9	40.5	10.4117	19.5848	30.4963	21.8193
9	6.75	5.54307	0.241829	0.028914	2.17051
9	3.57	14.3721	60.5624	16.1661	6.26077
9	0.91	4.13242	1.57483	1.29162	0.512963
9	40	6.19519	8.33804	8.92594	10.5252
9	8	6.24401	4.75048	5.2762	5.52968
9	1.632	11.3068	11.9394	8.08982	13.6092
9	16.5	12.8308	24.8186	24.4884	24.1186
10	0.45	6.82574	5.30766	4.26003	5.80841
10	24.3	9.65832	13.2367	4.35019	12.0859
10	1.836	7.16077	4.07997	0.88058	3.18314
10	47.25	15.6231	17.7294	45.6674	25.1622
10	2.52	14.5764	40.5336	21.4874	17.8277
10	16.5	15.7462	15.4675	15.2514	19.0543
10	3.375	9.37726	20.6343	4.17799	6.33561
10	46.656	27.9446	24.5514	52.7837	34.5233
10	9	4.784	2.31591	0.0402963	5.0578
10	6.696	9.20421	10.3507	18.3248	5.81589
10	9.216	13.5378	20.6415	31.6387	23.2689
10	90	29.8077	25.8894	11.4413	14.2589
10	3.36	34.7515	28.9353	23.7766	29.1392
10	143	7.17284	12.105	7.08532	8.46914
10	2.25	13.5953	19.2624	26.2032	16.111
10	18.75	7.11241	17.9713	6.26834	5.79468
10	0.014	8.38936	8.83536	11.0167	7.50616
10	34.684	7.83786	8.9851	3.60433	3.74637
10	2.56	17.6747	29.1009	43.8006	12.8419
10	1.5	5.61191	11.8379	7.83968	11.1091
10	0.64	8.00431	7.73834	17.3305	4.97415
10	2.16	4.67553	7.44276	1.83136	2.14021
10	0.06	2.83326	7.38218	1.69704	2.27135
10	1.352	2.56547	9.55268	2.23111	5.20379
10	0.576	6.81832	11.3702	4.43372	17.7854
10	0.56	9.52826	10.6318	7.90616	7.63076
10	1	7.05465	11.6342	3.65646	7.01519
10	0.36	8.52254	5.22947	1.60777	1.44579
10	24.75	14.9167	20.2891	42.1015	17.8159
10	1.35	11.3377	32.0394	17.2199	18.9463
10	1.683	5.46243	12.0318	7.64903	4.38004
10	3.6	6.50074	13.8294	24.0173	13.2884
10	2.25	5.46402	13.001	3.12357	7.66209
10	7.14	5.92482	11.1927	1.89815	4.0922
10	36.75	12.5706	11.5755	43.0292	31.2867
10	18	24.0156	48.8788	60.0893	46.4499
10	42	6.02486	7.1114	1.39254	0.805533
10	90.24	16.9	32.4957	21.3649	36.5821
10	96.25	17.6427	28.11	38.1577	42.8468
10	8	7.43542	12.4474	22.9998	15.0105
10	0.81	22.7564	22.132	31.152	30.4708
10	58.5	13.6841	14.8745	11.6809	13.0108
10	13.26	13.928	14.1169	10.1805	10.9571
10	132	23.8549	33.6297	61.373	30.3837
10	33.75	14.3922	17.1533	5.8748	25.6194
10	7.65	19.9396	38.352	86.1517	77.1863
10	91.143	21.5229	26.8668	25.7199	19.2373
10	1.144	9.39491	17.21	10.681	24.9364
10	4.95	12.4304	18.7305	1.96235	7.94474
10	50.16	17.4534	32.8485	18.087	30.4359
10	57.46	13.9494	22.3563	32.079	17.491
10	24.3	6.49801	9.31735	3.29379	1.86041
10	58.56	20.9984	18.2416	13.9263	17.7856
10	3.36	9.7403	13.5657	1.20742	5.61398
10	108	25.7509	25.8875	39.7371	20.0048
10	4.05	11.4056	10.3652	3.20632	7.07131
10	13.728	28.1157	24.249	44.054	23.3537
10	3.78	8.19863	5.96865	5.9087	1.68977
10	1.17	7.04907	5.99318	3.5781	4.49535
10	0.924	4.20045	3.91392	1.83926	1.74725
10	59.532	34.3947	21.7497	16.7704	14.4455
10	11.4	11.4224	9.21551	3.24582	1.37458
10	11.52	16.0652	15.4671	32.8755	8.03237
10	6.3	12.7139	18.9427	12.1018	19.2
10	15.75	17.3622	21.0855	18.0287	17.8981
10	1.716	7.08652	8.64206	7.5823	6.10049
10	11.25	11.6972	19.4482	20.7662	15.6907
10	12	10.3079	11.52	5.02426	6.77624
10	10	10.4847	12.0237	12.0357	5.35936
10	9	8.14971	6.10673	13.9387	4.58898
10	3.6	14.1437	23.1382	17.0975	16.7535
10	82.5	7.05319	8.85528	19.9734	8.24953
10	6	32.6255	31.2319	14.1078	18.5108
10	21	5.21228	40.8648	5.37845	2.96565
10	7.59	13.3583	19.4185	6.64687	5.78448
10	2.142	6.64922	9.87151	3.04044	3.03134
10	24.192	6.61868	3.83047	5.68664	4.8323
10	4.186	21.7186	27.5257	5.33151	15.6242
10	11.25	10.9761	18.1641	14.701	6.61982
10	1.56	7.92701	12.7408	7.01671	4.17673
11	7.5	16.2226	15.494	27.0266	15.0351
11	11.988	13.4444	12.006	11.5295	10.1751
11	48.125	12.9692	30.2867	27.1443	10.6494
11	47.25	14.6643	19.0499	40.5953	30.5671
11	3.375	8.51828	6.80939	10.5669	8.2452
11	46.656	26.5286	27.6344	40.4209	27.9796
11	36	10.4074	11.8855	17.2972	15.1744
11	5.1	19.5657	31.5899	17.8906	29.6527
11	29.304	18.5614	23.1822	20.0474	23.3405
11	6.696	8.74701	10.4491	12.2983	5.75891
11	0.616	7.86509	10.7396	2.79736	7.05332
11	90	23.2244	25.2286	11.4861	25.4492
11	0.539	10.3748	21.685	14.2869	19.8702
11	3.96	11.2046	23.1378	10.7489	29.3642
11	1.56	7.43094	13.2757	6.29043	12.4183
11	10.5	7.81691	15.6806	7.33254	19.9161
11	0.616	3.9749	5.12049	0.9092	10.1392
11	0.336	4.31306	8.60451	4.97699	8.15593
11	27	4.53737	3.886	3.27154	3.61133
11	0.546	12.2519	22.8501	4.74986	17.293
11	9.66	10.2608	11.4193	5.50432	9.13005
11	5.04	11.3289	20.1121	13.7922	21.2837
11	0.504	7.007	14.5043	6.52967	16.2422
11	0.42	5.79393	6.52527	4.35004	5.31879
11	1.848	3.75284	10.5225	5.93883	8.97108
11	2.16	6.19192	16.4928	5.90579	32.9853
11	3.536	6.75026	9.30004	7.13673	5.77962
11	46.494	10.2866	23.8184	14.0492	21.5669
11	3.6	6.45796	11.8191	10.4347	13.6384
11	30.625	11.8319	11.9022	9.16664	8.26869
11	18	26.0531	60.471	44.9855	61.0397
11	52.5	13.2787	23.2887	18.3349	37.3596
11	15.84	11.1693	13.9275	8.17804	12.8963
11	48	17.6818	42.5035	33.5936	48.9343
11	90.24	17.316	34.5767	18.6922	38.1459
11	16.128	18.8586	24.7802	29.5084	34.009
11	8	7.6486	14.5745	13.1895	15.2543
11	6	9.64991	16.41	14.9503	12.2144
11	21.504	13.9341	20.5877	16.3909	25.4627
11	2	19.859	22.929	8.66728	19.173
11	18	12.9885	24.7077	22.0942	30.9224
11	18.375	8.96647	13.4835	12.2328	8.86851
11	76.8	13.7328	31.8491	33.7308	34.2981
11	20.16	16.1503	21.5271	10.16	17.7282
11	4.8	7.85801	4.78548	7.91794	7.33029
11	50.16	21.4119	33.058	17.622	24.4556
11	127.1	55.2517	50.477	83.9415	61.6643
11	5.67	12.8002	16.3129	5.75985	11.2313
11	1.573	10.4067	14.2555	6.99344	13.3017
11	37.296	12.9726	16.0023	18.4245	18.405
11	15.625	11.2131	24.0802	14.8058	20.3976
11	51.84	19.1301	32.8258	25.6687	22.2983
11	0.539	10.6216	19.2583	23.8094	19.2977
11	56.25	13.6113	27.0728	23.2551	30.8296
11	0.48	6.29346	9.38991	4.10507	6.36066
11	5.984	8.78348	16.3895	14.2082	14.3885
11	11.52	11.7691	16.4882	22.0987	9.22962
11	27.965	12.8142	12.1992	9.62517	11.3247
11	6.48	9.71306	20.0685	13.2968	18.8944
11	12	9.8326	12.8119	7.41983	12.4568
11	0.234	16.5773	32.9898	13.8316	30.2347
11	22.5	8.0454	15.6366	4.09751	14.8535
11	21	10.7294	7.29767	4.53327	7.66026
11	45	15.9191	32.2982	54.5318	34.0717
11	39.75	8.86477	14.8223	3.97531	16.3958
11	82.5	5.62998	5.56998	6.71359	7.76379
11	17.6	12.7748	17.6682	12.2178	25.0646
11	24.75	11.8631	22.538	10.196	19.774
11	11.88	15.0847	13.5071	15.1918	10.9372
11	36.4	14.1119	23.1974	16.6313	27.8498
11	1	5.83672	10.5752	3.48146	5.55108
11	5.115	9.02213	10.2833	8.8717	14.0107
11	0.91	5.03344	10.7374	3.61846	8.37436
11	18.9	12.1276	18.6506	17.0078	14.1301
11	9.6	19.2516	25.5135	22.2421	21.4962
11	1.8	6.41825	6.26592	1.46639	3.03578
11	14.144	15.7867	22.7016	9.3875	27.112
11	1.56	7.0459	9.23671	11.9466	9.60111
11	17.28	18.941	23.6792	13.2864	11.0417
11	396	10.1246	18.1652	13.9124	18.0674
12	151.05	24.3241	33.573	27.347	29.7424
12	7.84	18.3613	17.3918	14.915	26.1637
12	7.2	19.4828	47.6295	46.2526	27.6313
12	52.5	14.891	15.499	12.595	8.03799
12	1.836	5.72868	4.61915	2.05	2.35591
12	0.02	15.4029	15.5629	4.12439	15.0915
12	0.027	10.4774	16.4768	19.5874	13.5562
12	22.5	4.51365	5.86388	2.32811	1.01496
12	3.84	6.27845	9.0079	2.1836	10.762
12	6.864	18.3628	33.443	22.268	18.7897
12	34.684	8.59873	7.10782	4.3512	2.45913
12	2.56	16.7258	31.2333	24.9927	11.7522
12	12.65	4.14923	5.02769	1.67667	4.24179
12	0.9	5.30227	13.049	3.01336	7.26542
12	0.42	5.39788	9.83029	6.29337	9.41413
12	3.5	8.91243	17.827	6.62426	10.2805
12	38.5	16.1602	30.3452	18.2805	19.6867
12	3.536	6.36618	9.84906	3.42511	2.94478
12	2.7	8.18624	11.2658	4.11081	2.3705
12	1	8.36563	15.7412	5.45763	13.5156
12	0.15	9.45155	17.01	8.26206	11.7432
12	2.64	4.71947	10.3817	7.6199	18.4204
12	11.25	9.02751	19.2826	14.7637	17.175
12	24.75	16.9082	35.4796	38.5704	17.4646
12	15	11.6403	16.3343	7.39391	6.06224
12	36.75	8.36154	10.8346	18.8581	22.3451
12	18	26.2661	56.4477	49.6248	54.5612
12	70	12.4111	22.138	8.16913	34.4729
12	40	6.59721	12.5685	19.5476	11.5442
12	21.78	21.8912	47.662	56.9528	54.7608
12	31.35	8.79948	17.5087	9.6601	8.01643
12	15.84	11.846	16.2648	11.8251	24.7062
12	48	20.2884	22.614	37.4584	25.3
12	8	7.96147	18.2487	16.4495	22.3298
12	6.375	14.4089	12.512	6.66944	15.4732
12	132	33.1492	46.0682	90.9619	57.1546
12	33.75	16.1707	18.8865	10.8303	28.3541
12	18	18.2517	26.0772	36.1171	32.7665
12	76.8	15.3879	20.409	24.6717	26.8099
12	11.2	16.5497	27.826	20.5407	24.2244
12	91.143	24.2039	30.716	30.6734	24.6033
12	1.144	9.50034	21.7564	12.8144	11.3448
12	1.232	4.58313	12.3566	5.66884	4.79802
12	11.25	25.9437	22.0013	28.5347	19.6542
12	24.48	8.25611	8.01848	7.26215	2.08379
12	31.5	11.5088	11.2595	17.6173	12.2204
12	57.46	13.805	20.1533	19.6669	22.3176
12	0.704	12.0507	23.7389	7.01175	17.6466
12	7.056	11.8718	21.3215	18.1838	11.1416
12	3.36	11.6842	15.7925	5.05564	11.6643
12	97.02	24.2735	16.2531	14.7125	15.2718
12	51.84	20.0907	22.777	19.8798	8.19218
12	108	31.9815	28.2058	45.9885	24.7327
12	0.539	14.6264	12.0431	20.5307	12.1779
12	3.78	8.70957	6.12308	3.75381	1.96563
12	1.26	4.07649	4.94803	0.987756	0.271387
12	5.04	5.71646	11.0784	2.27182	3.47468
12	12.42	13.0003	19.6156	10.857	28.4587
12	0.48	5.93419	8.8174	2.13273	4.98283
12	3.96	22.4009	33.4752	47.4288	53.3121
12	26.04	18.852	13.6687	15.7608	14.5553
12	11.718	22.7859	28.2305	50.9536	57.5521
12	79.9	9.46263	11.479	2.7904	10.1942
12	4.488	19.2483	15.9349	18.7042	22.0642
12	6.48	9.56151	17.2481	8.25985	12.5408
12	12	11.8473	12.035	19.5327	9.7753
12	6.9	14.8378	33.7488	7.55713	25.8789
12	0.12	11.2933	12.8956	8.43153	10.1001
12	4.576	9.81201	10.1968	1.97667	7.24061
12	18	8.56934	13.7536	11.4071	6.63619
12	38.72	13.4206	17.7828	10.0978	12.4129
12	11.88	13.397	15.6612	11.0139	17.9628
12	4.186	18.3991	23.144	6.34216	12.7253
12	0.816	6.4226	13.5948	3.74172	3.82933
12	3.57	17.7436	47.6627	65.349	15.2795
12	0.91	5.0422	9.963	3.05952	2.89514
12	11.25	13.2323	17.9597	16.5928	9.42163
12	3.536	8.73617	18.2686	8.9014	8.96828
12	24.64	13.5788	17.3246	8.71346	12.8159
12	45	18.4109	20.521	9.21768	24.5646
13	7.644	25.8503	31.7442	41.2625	22.7633
13	8.84	9.95319	8.21741	8.72273	15.3179
13	24.48	9.49484	12.1857	8.65304	11.6567
13	0.45	6.83532	7.56009	4.31537	7.90094
13	24.3	11.3587	16.0595	16.2629	15.6372
13	0.125	11.4005	13.9907	12.0318	25.221
13	46.656	29.2164	29.0008	44.9696	47.1908
13	1.5	8.03811	11.3133	10.6322	9.57587
13	20	17.7196	38.1767	33.679	35.8083
13	6.696	8.56412	9.30685	14.3876	5.07995
13	5.6	19.1268	20.8427	21.5588	23.3266
13	4.05	14.423	28.6088	41.9097	25.9307
13	10	13.7441	11.5966	15.384	8.61105
13	0.21	8.9717	2.80268	1.41454	3.28823
13	4.356	13.402	18.5254	16.957	21.1121
13	13.2	8.81782	12.8624	9.67657	9.24442
13	0.616	3.74904	2.39443	0.788371	1.41092
13	17.34	9.78734	11.0962	12.5355	15.6801
13	3.264	4.68951	4.38668	6.05609	1.60046
13	34.3	8.91268	8.2219	5.08466	9.47289
13	0.336	4.09682	5.80042	3.4212	5.3706
13	0.832	10.3687	12.5675	9.9102	16.0934
13	9.66	12.8463	7.70347	6.64058	4.99397
13	5.94	9.1393	10.8813	12.6855	13.9139
13	0.462	10.903	9.87545	13.8303	8.47211
13	13.12	6.11123	6.55469	10.6965	6.24692
13	1.683	7.39336	8.83011	7.80147	7.84969
13	15	10.9186	11.0215	8.7663	10.4956
13	42	6.32405	4.82229	2.70017	1.58498
13	40	7.29172	15.1212	13.0201	17.0648
13	21.78	28.606	57.165	42.7437	44.1561
13	27	13.9425	12.0953	9.65636	9.19086
13	96.25	21.8851	49.7674	57.1357	45.9263
13	2.85	6.90421	5.52158	4.59458	5.05292
13	18.9	7.10742	6.88032	8.64665	9.07237
13	18	14.7342	20.6916	23.7058	32.7655
13	54	17.3368	23.0288	22.8712	21.9778
13	25.6	19.2174	44.4461	20.4811	16.3833
13	4.004	7.0849	7.11523	7.28576	6.30053
13	7.2	11.6312	12.748	12.168	13.8827
13	20.25	8.28069	11.7751	11.5554	9.90472
13	4.05	6.09462	6.12264	8.39127	6.55726
13	31.5	9.85884	12.1003	7.16615	13.3696
13	15.75	12.4573	16.5247	17.6202	22.709
13	1.573	10.8145	11.8937	8.44332	9.23646
13	58.56	19.7198	16.6693	18.3326	22.2302
13	7.056	11.3029	12.4361	10.8765	8.27362
13	8.526	13.7444	15.918	13.5251	13.3797
13	0.539	11.8715	17.7988	22.1587	11.4012
13	19.04	7.99796	8.43971	9.40202	10.3252
13	12.844	21.135	26.2761	20.2214	27.3615
13	1.26	4.04111	3.16433	1.59037	0.987039
13	45.92	10.7995	18.1548	8.75444	13.5177
13	5.04	5.21797	2.60584	2.33365	0.879496
13	12.42	10.7057	14.03	9.02545	12.7044
13	5.984	11.9436	15.437	13.5571	11.1431
13	59.94	28.1507	50.7099	34.6218	35.7897
13	6.3	14.6203	14.1504	15.1868	21.2533
13	27.965	12.4421	10.5818	9.46998	13.8214
13	10.868	17.586	21.2438	15.4624	21.7763
13	6.48	11.0824	14.4668	13.7059	12.2982
13	0.12	9.65185	13.5484	15.6885	9.85359
13	1.44	12.4822	15.9269	17.6958	25.1418
13	9.375	11.289	11.3898	9.36385	13.1104
13	5.85	10.2747	17.8392	20.736	20.7437
13	1.4	11.6913	10.5483	17.3307	9.52619
13	18	6.32006	8.64916	8.70368	7.37804
13	97.5	21.6051	29.0995	33.9388	23.4955
13	26.25	11.4419	16.6995	19.2324	20.4583
13	31.5	7.66474	9.30634	12.2591	13.6504
13	36	16.1788	19.2172	21.2932	16.6694
13	40.5	9.92131	14.3069	15.8007	20.6881
13	1	5.87341	8.99619	5.60013	9.65389
13	1.5	6.71173	7.84975	7.0599	10.7567
13	256	25.5321	26.9803	22.9736	50.8471
13	18.9	13.71	24.6031	20.8147	15.329
13	1.2	4.32858	6.0833	9.5851	4.14405
13	8	7.4066	11.9805	11.3989	15.85
13	1.21	5.60957	9.89459	12.6576	8.73695
13	10.35	16.6598	23.895	23.7967	33.4044
14	7.644	26.4176	35.0055	29.1151	31.92
14	31.5	14.9097	17.508	15.2614	6.98073
14	7.84	18.3294	27.376	30.0262	22.9673
14	1.836	7.66955	2.59023	1.09509	1.57723
14	47.25	16.4292	31.5426	25.6205	48.8053
14	2.52	15.9916	72.8809	20.1062	15.7609
14	0.81	12.3163	9.02901	3.43121	6.1811
14	2.145	6.11763	5.09765	11.1531	4.56097
14	0.027	12.741	14.4436	35.563	17.6257
14	24	9.89945	10.4399	14.8484	12.5184
14	3	11.4367	10.0878	7.21092	13.446
14	20	13.8431	36.8147	33.6547	46.7255
14	6.864	17.7291	20.5769	20.646	14.9417
14	5.1	16.9346	16.4224	9.76117	16.9943
14	61.152	8.13155	6.44863	6.91266	5.93801
14	15	17.5484	12.4221	11.1852	7.51226
14	9.216	14.5441	22.917	22.9127	8.75003
14	143	7.42466	10.3935	4.84029	6.44405
14	4.05	16.503	22.1188	30.3102	13.6156
14	0.21	9.62332	1.98966	1.8139	1.17006
14	4.356	15.4521	13.1335	13.8651	17.1102
14	0.216	4.87897	3.59904	3.12985	5.89197
14	4.5	9.82782	7.37131	8.09226	5.15894
14	0.832	9.94887	10.3775	8.41694	15.8796
14	0.704	6.24841	3.99967	4.81047	1.66904
14	12.65	4.417	3.31458	6.54548	1.2208
14	2.16	4.55321	1.77545	2.38264	0.846066
14	1.1	3.60517	0.91556	1.50294	0.526566
14	0.288	5.03886	0.992878	0.580322	1.43372
14	0.42	6.25818	5.55442	3.874	3.06721
14	0.504	5.79526	2.53542	6.78368	1.78357
14	1.352	3.12306	3.49304	3.72677	0.864805
14	5.4	6.40624	6.1476	12.7136	4.1333
14	2.7	10.6305	7.25028	5.49399	5.46786
14	0.15	9.73213	8.48609	8.57444	8.41627
14	46.494	8.48675	11.854	18.7981	13.7401
14	1.35	11.1606	49.1357	9.54291	7.70966
14	8	9.34093	17.9475	11.6246	4.33321
14	2	33.2843	28.491	18.6528	16.405
14	132	23.2042	61.8056	66.564	65.0388
14	54	16.2831	29.4397	19.0165	20.6554
14	20.25	7.5042	10.216	18.73	11.0233
14	1.1	7.99374	7.72121	6.92152	6.05617
14	4.05	7.65544	9.00006	18.3187	6.45987
14	11.25	26.2917	25.8224	41.2919	45.4981
14	0.704	9.35339	9.53693	4.74867	16.8949
14	6.93	12.7874	33.9526	21.6227	7.02547
14	0.24	8.68057	16.2635	11.4595	23.6831
14	108	28.8074	32.5653	40.2683	21.1496
14	21.12	15.1643	18.3629	15.3761	5.63391
14	0.539	14.2172	17.1158	22.3938	12.4566
14	12.844	27.0295	33.6641	22.867	55.699
14	4.56	16.3705	17.1604	12.5772	11.8389
14	0.48	5.58416	5.54637	2.78725	2.15838
14	3.96	21.8207	38.0968	48.4164	60.1448
14	59.532	30.3481	32.9818	51.5832	38.8968
14	4.488	20.25	23.3526	32.8765	33.9972
14	59.94	23.1941	37.3407	11.8621	35.2492
14	2.184	24.2061	64.1004	32.2876	46.0943
14	27.965	14.47	15.1905	14.1246	11.8473
14	10.868	22.2273	23.612	20.675	26.5904
14	0.234	15.4717	20.9917	20.2643	10.1971
14	1.44	14.3591	22.7933	27.3362	46.3384
14	9.375	9.80153	10.3878	9.62198	17.3628
14	82.5	7.5577	15.2234	16.0515	10.9038
14	19.2	10.5518	11.6366	7.74783	13.119
14	100	21.8014	21.3814	22.1434	30.5256
14	38.72	13.5138	13.5394	14.6114	11.756
14	31.5	7.90116	5.92222	11.4968	19.235
14	7.038	7.76837	10.8634	6.40024	12.2393
14	1	5.82873	9.2344	5.12375	4.73418
14	5.115	10.7404	18.7755	14.601	8.92164
14	7.7	9.63433	31.3565	20.9219	8.46481
14	1.5	6.38498	8.77622	8.77558	6.71622
14	1.785	9.46902	7.38835	9.61022	7.57596
14	1.632	12.1024	14.432	7.10377	13.9888
14	17.28	15.8037	25.0915	20.0231	16.5017
14	90	15.1359	20.593	13.0345	16.122
14	10.35	16.1875	27.6279	25.3901	46.6712
14	16.5	13.9343	27.9213	27.0327	8.01835
15	31.5	14.3539	16.5159	17.2257	5.03087
15	151.05	22.784	23.8689	22.8388	44.4091
15	7.5	18.9055	17.5634	37.111	35.3271
15	60	7.54233	7.2769	7.89303	5.25049
15	0.81	9.56284	10.0358	9.28084	5.78999
15	9.36	23.2815	23.9081	11.79	16.347
15	6.422	15.8896	13.08	11.7725	15.7297
15	4.8	3.67475	4.97665	3.1729	2.84591
15	16	7.44974	10.9747	9.03738	11.6361
15	6.864	16.9005	28.6279	24.8103	19.5439
15	15	22.9662	23.3495	22.7602	57.2388
15	29.304	14.6149	20.7105	16.0405	25.1671
15	148.5	45.1725	33.1265	40.6276	30.4565
15	11.55	9.19085	10.0558	8.74825	7.23313
15	0.616	9.68529	15.8265	8.80974	6.58789
15	5.508	13.0067	13.6121	11.0257	25.103
15	143	6.0124	5.38507	2.52267	4.42742
15	2.25	16.1303	16.9415	16.5927	18.4897
15	0.21	8.304	6.36484	2.39815	16.9574
15	0.216	4.98766	3.63981	2.52349	8.63942
15	5.76	12.0018	5.88314	6.2462	5.97383
15	1.8	11.9689	7.07335	10.6	7.50216
15	1.5	4.64327	8.81162	4.47683	9.86037
15	0.936	6.13369	4.90126	3.54789	2.98773
15	0.288	3.90571	3.71806	1.94819	8.58607
15	0.576	5.43175	6.77986	2.89054	10.8899
15	0.462	11.1828	15.2774	12.266	15.5785
15	2.64	5.11028	5.51771	3.84182	8.84892
15	0.225	6.62912	10.3279	10.6356	17.8954
15	0.432	4.60346	4.20456	0.23427	1.17383
15	36.75	8.52022	12.679	13.2662	34.4201
15	70	10.0263	18.3797	5.4202	30.5142
15	31.35	8.12018	11.017	6.03341	11.2068
15	33	16.7921	16.5173	12.705	7.13562
15	15.84	10.4723	10.7722	5.6086	15.2436
15	48	15.7357	20.0388	34.3197	18.4385
15	90.24	14.9007	30.0514	21.745	42.1456
15	6	7.90495	10.1288	19.3428	6.83016
15	43.75	9.16956	10.265	18.0866	22.7886
15	33.75	12.1921	18.1582	9.85926	29.8245
15	33.06	10.3958	10.2271	7.9899	4.69632
15	18.375	10.3097	15.0346	15.95	12.9211
15	54	13.6973	26.988	13.6063	17.0536
15	7.2	12.118	16.4374	10.0178	8.62655
15	3.375	11.3396	17.9743	11.8115	6.98989
15	4.8	8.63468	7.85066	14.6534	16.9942
15	3.375	7.84693	13.6443	14.0448	7.36553
15	14.04	12.965	11.3228	5.83193	2.78897
15	15	15.2297	14.3463	15.7712	13.3667
15	7.056	9.6257	14.2234	16.0837	7.80659
15	15.625	11.651	12.0293	8.60611	6.74655
15	269.568	26.3267	40.7589	55.282	79.5784
15	3.78	7.17005	4.45397	2.57876	3.75176
15	56.25	15.0702	20.5586	19.3894	22.4372
15	1.2	9.64648	11.4039	9.99068	4.99174
15	24.192	11.6717	11.309	7.31932	6.30648
15	5.984	11.3312	9.60392	12.2166	11.6435
15	4.488	17.5848	12.2612	13.7308	13.993
15	4.224	11.7214	6.00659	3.59463	9.69459
15	21.384	8.98706	8.13021	5.61483	5.44174
15	6.48	10.0918	8.00374	8.71204	13.6945
15	4.5	20.1517	16.5074	15.3295	9.58814
15	39.75	7.22419	5.75801	5.76811	5.553
15	82.5	7.21547	10.495	8.9363	14.7946
15	48	3.72914	2.49983	0.905764	2.10135
15	7.59	12.4277	11.1056	6.07497	3.21793
15	24.75	8.86339	9.11	8.84735	5.4268
15	31.5	5.90905	5.88673	10.7831	10.5041
15	24.192	4.38068	2.41876	3.81538	2.72001
15	4.725	19.3105	43.6608	21.9096	21.0514
15	5.115	8.99828	12.7095	8.82824	20.2099
15	1.5	7.57845	10.0006	4.31607	9.32843
15	12	12.1841	13.0122	13.7893	15.1469
15	1.2	4.30245	6.90707	3.67255	3.53558
15	8	7.44124	10.811	6.93317	8.32791
15	3	19.2635	21.3581	29.6012	27.8589
15	1.21	7.04336	10.0442	12.7168	9.37085
15	1.56	8.56705	9.55597	10.303	8.527
15	45	21.2568	27.7596	16.4867	21.1813
15	16.5	9.71353	17.3785	11.6514	14.4124
16	1.56	5.19432	7.55397	5.65092	4.65002
16	7.644	30.7768	34.5016	44.9504	28.4669
16	11.988	9.5701	13.5164	10.4804	26.0722
16	60	6.79462	6.99394	6.40425	4.69332
16	1.078	6.36248	10.6954	6.11477	9.67066
16	48.125	14.308	39.6682	20.4239	2.65734
16	1.836	6.92166	2.41911	1.78822	0.839821
16	16.5	14.3694	15.308	15.1744	9.24678
16	1.5	9.08672	11.2673	8.28147	6.23912
16	1.5	6.62976	7.63696	7.20957	4.51072
16	4.335	6.096	6.37878	10.0823	7.51154
16	9.216	13.9579	24.9395	18.2173	23.8751
16	1.008	6.38813	4.7023	6.96345	6.44284
16	2.25	16.2687	17.6597	22.0851	15.9015
16	18.85	11.1582	13.3094	12.1999	7.10854
16	13.2	8.59047	7.86199	6.9795	7.94784
16	0.616	5.10811	3.35808	1.3589	7.80678
16	3.264	4.37573	4.03623	4.65522	0.589925
16	0.336	4.50087	5.9433	4.93096	3.42681
16	27	6.04017	5.07097	4.53756	2.35899
16	5.04	12.6288	21.2702	14.2127	8.70641
16	1.1	3.78072	2.88627	1.80598	2.38759
16	0.42	5.28544	6.18291	6.07537	6.39326
16	2.64	6.07094	6.38235	6.32172	14.2126
16	0.432	3.31551	2.90744	1.72167	0.591931
16	67.5	12.3842	24.1678	12.336	30.0298
16	15	14.9514	13.4178	11.008	11.702
16	24	17.0751	30.6806	36.8982	20.0616
16	40	7.50512	12.9562	11.3628	23.2827
16	6	10.3525	14.1779	15.8268	18.452
16	6.375	12.1855	11.4748	6.06246	25.1547
16	0.81	22.6374	21.2018	31.0992	39.9674
16	4.004	6.62061	4.31456	5.6347	2.54072
16	21.6	21.7895	15.5107	12.8918	11.1654
16	31.2	18.4504	21.8379	27.0853	19.264
16	4.8	9.53346	7.03532	11.4845	12.9597
16	1.1	9.05328	9.17577	4.05877	3.63133
16	50.16	19.4868	31.3571	23.1212	28.7147
16	1.573	12.0067	12.0076	10.3748	13.5987
16	3.375	8.28082	13.0614	21.581	8.65092
16	0.704	11.8777	18.4969	5.72782	16.0568
16	37.296	11.0003	18.8465	18.1071	34.4722
16	0.528	10.4673	14.6504	14.526	30.1131
16	6.93	12.712	31.2755	13.9298	13.0611
16	4.914	5.48531	7.25343	5.0619	13.5848
16	1.26	4.54362	3.87343	1.91496	0.6654
16	45.92	12.3683	17.1525	12.2487	11.7755
16	12.42	11.3642	14.7936	5.97506	8.1403
16	24.192	14.1124	18.3494	9.9948	13.5057
16	5.984	11.0712	14.1882	11.5542	13.8736
16	11.718	28.2889	33.3083	24.0782	43.158
16	11.52	12.5311	14.5085	21.3147	3.92538
16	79.9	9.48199	10.5965	5.07459	17.2815
16	6.3	19.3701	16.8668	24.387	17.1878
16	2.184	22.4029	50.3665	30.3619	33.8213
16	27.965	11.287	9.10191	9.62793	14.453
16	1.716	7.33736	8.4308	6.6571	7.47813
16	6.48	9.87348	11.867	11.3769	15.3343
16	9.2	27.3156	22.0798	36.619	21.7924
16	4.5	20.0366	18.8341	21.4678	15.1244
16	39.75	7.52345	6.89169	5.64653	3.31781
16	18.75	12.3869	14.2286	8.1723	11.7182
16	10	10.1648	12.4819	4.21744	8.47316
16	6	36.0878	44.8853	33.589	24.6208
16	21	5.22365	60.1513	4.82791	2.09746
16	7.59	11.3182	10.3911	7.44595	5.2984
16	24.75	12.9698	15.0689	14.1858	9.16252
16	26.25	8.81971	11.9411	12.9391	10.4005
16	31.5	7.67943	9.29846	13.0223	11.8616
16	11.88	18.1216	14.5989	18.5648	14.5679
16	36.4	15.6172	17.2894	18.0796	14.3018
16	7.038	9.07349	10.3647	11.0191	7.84176
16	2.142	6.70005	5.43342	4.49742	3.2931
16	0.816	6.01575	7.59217	6.81848	3.65831
16	0.91	4.14448	4.06941	2.32132	1.15207
16	11.25	10.365	12.7525	16.2058	8.33693
16	18.9	13.6345	24.7491	16.1478	20.858
16	9.6	21.868	19.4063	14.3027	9.71087
16	24.64	13.8844	17.9378	10.6191	11.0482
16	45	18.8606	16.8429	11.5036	13.9403
17	59.15	21.574	30.4992	15.8406	12.6821
17	11.988	13.6125	8.01302	16.5405	18.696
17	52.5	15.2696	15.355	13.8597	13.2004
17	9.36	19.0741	26.0287	17.5968	22.2675
17	3.375	8.49495	23.5852	8.83546	9.41636
17	3.375	7.71655	7.86901	10.614	4.20792
17	9	4.08532	2.61406	0.405911	1.51835
17	24	10.276	12.7895	8.4116	17.4615
17	1.5	6.02195	5.4538	3.89157	5.1508
17	3.84	5.05051	7.85066	0.248259	1.02386
17	13.05	6.65643	9.45697	3.92438	4.22582
17	4.356	13.2557	21.0584	15.8979	23.6557
17	13.2	9.43958	13.6363	6.73473	8.78797
17	1.56	8.37469	12.0314	5.36966	3.36677
17	0.616	3.80307	6.94764	0.925011	1.94616
17	1.8	11.1671	11.7109	9.9766	11.5603
17	3.264	5.14374	9.36983	3.63932	2.93886
17	0.832	7.51017	12.2592	8.46471	19.4657
17	27	3.9279	5.85343	2.53426	1.30171
17	0.9	4.15999	14.6729	1.89079	2.03657
17	0.252	5.46556	8.6333	5.40259	2.78254
17	5.616	3.88666	5.80747	1.30121	1.1267
17	1.352	2.73045	10.8514	3.84414	2.91184
17	1.848	4.26523	10.4649	4.6045	7.75706
17	5.4	6.26648	13.1021	4.698	5.63087
17	38.5	14.488	24.1578	12.5446	11.0372
17	16.2	11.1091	28.4801	21.1434	18.2664
17	2.64	4.29035	7.11853	2.60501	4.80434
17	24	23.6515	27.1615	26.2798	17.7842
17	70	13.6873	23.6664	11.1356	22.9961
17	31.35	10.1146	15.7233	7.88924	10.8007
17	8	8.22465	19.4971	16.3736	10.3769
17	16.8	18.2786	21.6883	15.1786	16.1846
17	132	27.5693	28.6341	75.0357	65.5503
17	18	13.2211	25.6853	33.1838	31.1606
17	18.375	8.19381	13.8479	16.2296	7.03004
17	4.004	6.775	8.93329	8.11215	9.21255
17	5.5	18.2784	22.2635	9.43073	7.96582
17	11.2	14.2289	25.0231	13.8839	12.7821
17	20.16	14.9988	16.0783	4.27228	8.3095
17	1.1	7.13163	8.91573	4.60992	2.3047
17	0.704	13.4945	29.854	9.475	9.87602
17	6.93	11.9771	37.7653	17.7072	15.6871
17	8.526	13.5027	22.4232	16.5998	14.7613
17	0.539	12.517	17.153	17.2458	10.7157
17	12.844	28.0279	32.0778	17.7895	27.1958
17	6.44	14.2874	11.7348	9.21236	11.315
17	45.92	11.6644	20.687	10.4553	14.7213
17	4.56	13.5371	9.18785	8.41683	9.6553
17	3.96	21.5064	32.5619	35.21	53.8773
17	1.573	11.5675	26.4794	13.2851	12.0819
17	31.5	10.7587	25.404	11.8347	11.9436
17	76.755	19.37	31.1981	28.1097	30.2407
17	41.58	8.10935	21.5274	6.99293	5.11394
17	3.808	13.2578	17.39	8.55988	9.92745
17	32.4	37.3299	40.8416	44.2941	58.9474
17	0.234	16.1408	30.1111	13.5073	15.5943
17	1.44	14.8874	25.4498	28.1874	35.9441
17	22.5	10.2295	24.4665	4.91592	3.65797
17	21	10.8922	7.78388	2.75808	1.88629
17	45	18.6557	23.7597	29.0593	17.654
17	18.75	12.4388	22.5792	6.85495	6.11175
17	9.375	11.1191	11.8935	6.91229	7.26379
17	1.4	10.7988	10.8696	19.1343	18.9731
17	7.5	5.68001	11.1127	2.60023	5.74736
17	10	8.62325	11.2711	6.3931	4.9562
17	7.59	13.0202	18.2601	4.4767	3.6225
17	7.038	8.23962	10.929	7.76923	5.34578
17	49.5	26.7019	27.9249	41.0889	43.1909
17	6.75	5.62903	5.65589	1.4279	3.77311
17	4.186	19.5115	26.0017	10.9995	9.9703
17	0.816	5.05099	13.8647	4.10585	3.18777
17	37.625	14.0295	20.0887	18.3406	17.9124
17	256	29.7527	42.8981	24.2051	43.1056
17	40	7.36602	12.7866	9.79984	8.42113
17	3	14.4041	26.7725	20.8958	17.5343
17	1.632	10.5714	12.1004	6.0409	14.831
17	14.144	19.6388	26.0397	7.76474	11.892
17	24.64	16.5786	19.0359	20.2818	15.637
17	16.5	11.5852	22.6966	11.4746	6.71852
18	1.56	6.49552	7.99041	15.9896	29.4236
18	11.988	12.3455	10.7383	19.9297	22.636
18	1.078	7.98457	8.6141	4.24097	6.2303
18	23.328	8.15983	11.0915	4.88853	2.71952
18	0.45	8.62115	6.20512	2.98927	5.85689
18	47.25	17.8474	20.8908	40.4763	40.1211
18	0.81	11.476	19.9415	9.74963	9.1297
18	7.225	16.5205	17.6544	11.7084	8.89403
18	16.5	13.653	16.4919	20.8603	16.0751
18	9.36	19.8268	24.4355	13.6268	25.2009
18	3.465	6.25786	9.09994	5.41912	6.08193
18	10.12	14.177	10.7594	10.9711	19.7366
18	1.5	8.02046	11.0844	10.5514	8.80231
18	4.335	5.90337	5.26868	10.0742	6.67945
18	148.5	41.1053	36.2633	41.8241	27.8697
18	5.76	16.1095	11.6209	6.20478	2.59512
18	1.8	11.6397	13.0294	13.4042	12.2446
18	34.684	8.77044	12.5724	6.79447	10.7504
18	4.5	8.43657	17.3224	9.7313	5.54652
18	34.3	10.3307	9.53245	10.958	8.90414
18	0.832	8.86935	15.2177	9.60776	12.1511
18	12.65	5.30128	5.97318	5.14948	4.83752
18	0.546	12.6297	22.6002	4.45113	4.75416
18	1.5	5.59432	9.42749	4.50296	6.16873
18	0.9	4.83502	5.18588	1.48367	0.364332
18	5.04	12.6462	20.5197	11.6501	17.889
18	7.182	12.1018	13.2961	2.62507	3.84258
18	0.252	6.14223	8.26744	5.53452	4.93342
18	0.64	8.96492	7.68452	8.97492	8.3655
18	2.16	5.80443	5.74699	1.59165	1.26965
18	1.1	3.64086	6.14269	3.19313	1.30095
18	0.528	8.59061	12.6937	9.31865	7.56287
18	2.7	7.71694	10.8114	5.68385	2.46055
18	0.15	8.49353	11.5335	8.98686	5.55807
18	0.36	7.42444	5.70378	3.68511	3.08551
18	0.432	3.19051	6.83486	1.07483	0.822441
18	1.683	5.68665	13.5643	8.59629	10.9305
18	36.75	12.4727	10.5778	21.0454	50.5727
18	30.625	12.5891	13.6578	17.6522	18.7016
18	33	13.8529	16.9874	11.5852	9.75727
18	16.8	19.222	26.1865	25.0999	25.7606
18	0.81	25.7714	21.8056	34.8673	45.8827
18	18.9	8.09968	10.3222	8.14942	16.8988
18	33.75	15.662	18.7103	18.0431	22.6632
18	33.06	10.2721	13.4373	11.792	6.82525
18	45	5.99309	4.80216	1.45573	4.98424
18	7.2	14.2092	18.0127	10.0337	8.01514
18	21.6	17.8261	16.5583	9.21409	26.0694
18	24.48	8.19519	7.9574	3.37974	7.83414
18	24.3	7.32484	9.03702	6.83184	1.51904
18	14.04	14.9553	19.5889	10.4112	2.77878
18	0.528	11.5056	9.24268	12.1947	16.5005
18	0.24	8.28595	5.12573	4.20699	9.05138
18	269.568	22.5275	23.3933	38.1935	52.8393
18	108	24.3905	22.0241	28.4092	14.7152
18	4.05	11.156	9.10896	3.41719	7.78529
18	13.728	25.3395	29.0938	21.8004	20.6129
18	3.78	7.67646	7.0454	2.92278	2.4644
18	56.25	15.133	28.1287	25.9928	27.8316
18	24.192	13.8143	17.7137	11.2774	4.47179
18	11.52	14.9325	20.57	22.1542	5.8707
18	4.224	10.6274	12.5836	9.53985	7.6298
18	6.656	15.3843	16.5967	17.9984	16.5301
18	1.485	5.60371	10.1577	5.40883	1.08733
18	5.168	11.7446	19.1472	15.4524	20.6705
18	31.5	10.1626	20.589	18.232	8.97932
18	32.4	29.2704	37.0584	32.9165	59.2256
18	10	8.80427	10.2255	8.59072	6.84244
18	45	19.6902	31.3113	39.2834	27.6821
18	1.4	10.073	13.065	18.0715	15.1895
18	0.24	13.9535	24.7502	8.80007	20.4112
18	11.88	16.402	12.4344	7.3473	10.9793
18	36	19.1682	20.0481	28.9285	36.6018
18	6.75	6.59545	8.88003	3.37404	3.28757
18	4.186	15.4132	10.1195	6.903	2.00719
18	256	23.6946	31.8049	26.9125	42.1432
18	10.8	7.67563	14.4824	19.9631	15.6949
18	2.925	8.05303	12.9389	14.1329	8.97096
18	10.35	18.9877	23.4748	24.2381	35.9013
18	396	11.4229	13.9142	10.6183	11.9658
19	60	6.63938	8.65933	8.54665	7.80636
19	48.125	13.798	34.6741	28.3141	14.4583
19	16.5	13.5533	13.8095	15.0751	15.2425
19	9.36	16.618	17.3463	13.4557	18.1697
19	46.656	23.1186	22.6174	38.0982	34.3907
19	9	4.52723	2.6842	2.24496	4.36612
19	1.5	5.84381	7.09974	6.08326	4.93811
19	16	7.16446	11.6174	11.7085	11.6866
19	4.335	4.98885	4.4642	7.06429	6.9054
19	27.72	18.6046	16.3762	14.4058	15.9006
19	29.304	16.7057	21.1002	23.5192	26.1821
19	148.5	43.5324	50.2684	79.2182	69.1156
19	9.216	14.7063	17.6247	12.5728	9.24069
19	1.008	6.40938	5.7369	8.33788	6.81421
19	6.804	15.3047	21.1597	18.5441	23.9665
19	0.21	9.93171	4.02069	2.10723	5.28487
19	23.4	11.8425	18.1908	21.6942	14.7285
19	4.5	8.42591	10.4975	10.3781	6.79125
19	2.56	20.7226	33.5414	30.1842	11.4924
19	27	5.27179	3.37629	3.42355	2.92549
19	1.5	5.41148	7.49337	5.94968	5.56147
19	0.936	6.14222	5.39808	2.80104	4.52803
19	5.04	12.3544	20.1235	20.001	21.0186
19	0.504	7.89681	10.2781	8.20736	14.276
19	0.06	3.84224	8.37652	3.6272	2.93983
19	0.576	6.40305	6.41365	3.84732	12.2839
19	2.64	7.41149	7.60364	9.56273	15.1472
19	0.225	6.85573	8.7398	8.80075	10.9812
19	13.12	7.52881	7.35747	9.19448	4.31142
19	46.494	8.363	15.5966	14.2604	14.022
19	3.6	6.85452	13.1604	19.0982	14.5316
19	15	11.2104	8.48907	9.20702	9.8094
19	70	16.2743	29.1528	15.0988	33.8513
19	21.78	24.4651	51.9609	52.2733	55.777
19	27	10.8987	12.7762	11.2737	14.7184
19	48	19.1654	32.3715	37.1381	52.3669
19	20.25	8.03342	10.6102	7.95417	8.47541
19	13.26	12.5882	10.6777	8.75878	15.7789
19	54	7.57931	6.57453	6.02457	8.70082
19	7.65	14.3492	16.8948	21.5994	15.7035
19	18.375	8.69214	11.6376	15.2265	5.54301
19	3	14.1701	19.4096	17.01	8.68791
19	6.552	8.10671	5.36219	4.96544	7.81638
19	20.25	9.13952	11.5715	11.0019	14.9389
19	1.1	9.54278	8.69603	7.02092	2.83467
19	16.32	11.8778	10.4229	7.78717	8.72113
19	240	23.2501	49.6723	48.2182	43.1595
19	14.04	12.7872	18.0214	8.30637	5.65977
19	15.625	9.80434	15.7245	11.7342	9.41296
19	5.865	9.4075	12.1823	18.494	9.83489
19	10.35	15.4009	14.2211	9.33059	20.3316
19	4.185	12.0934	11.6152	14.3629	12.8965
19	6.44	13.6718	11.4215	6.50189	5.8506
19	45.92	12.2579	15.7231	12.3395	13.6891
19	0.924	8.3678	10.6596	10.4882	11.6556
19	0.48	7.20369	7.16367	4.07974	5.26627
19	59.532	33.899	31.6678	30.1238	39.6536
19	6.3	14.5536	12.9124	19.8159	19.0208
19	27.965	13.5351	13.2261	10.1579	17.3911
19	31.5	10.4054	17.6636	14.6011	16.9973
19	32.4	25.0241	21.1739	16.5187	23.9654
19	6.48	8.45953	12.1766	12.1488	11.8362
19	6.9	15.9084	33.3864	19.7384	30.0176
19	0.234	10.9999	17.5396	11.5693	20.9349
19	1.44	12.0581	16.7117	14.4103	25.462
19	22.5	7.97888	9.20756	8.19565	11.2012
19	100	18.5253	17.2541	15.2279	14.6303
19	8.4	13.7144	18.9958	24.1888	27.5248
19	11.88	16.2443	12.0679	12.6232	23.3424
19	36	17.0189	17.2786	20.5626	14.6432
19	0.42	7.06978	7.72388	8.47492	11.3799
19	7.038	7.9882	10.1745	11.5989	11.1254
19	4.725	13.8686	27.7642	17.2605	25.0968
19	5.115	10.4265	12.4133	11.5714	24.0257
19	0.91	4.49715	4.93297	4.94478	3.09374
19	256	25.7285	34.7737	33.3457	58.9265
19	1.8	7.76124	4.40277	2.76869	2.21618
19	3.536	7.21869	9.59899	7.28482	8.88282
19	1.56	6.29937	7.16482	10.1383	8.08076
19	396	9.38344	16.1302	15.7022	18.8765
20	1.56	6.84631	6.09766	16.5206	5.40014
20	7.644	28.0815	28.4919	34.8475	33.2697
20	24.48	7.98556	13.032	9.75223	15.4756
20	0.45	9.06291	5.8159	5.63677	5.73769
20	9.36	30.5333	30.5328	23.8086	23.3646
20	0.027	11.0823	17.4465	15.4026	19.1413
20	3.375	7.26194	9.62915	12.3078	8.85946
20	20	16.1121	35.2995	27.3387	38.004
20	61.152	6.18371	7.21563	6.73497	5.23284
20	6.696	9.00482	9.84914	11.2203	5.20335
20	143	5.76681	10.4487	2.4247	5.85697
20	10	12.9091	14.7253	17.3021	12.9004
20	13.2	7.99114	13.5997	5.44304	9.20574
20	15.4	7.03739	7.45038	3.80289	7.01899
20	4.5	9.08418	13.6935	15.9083	12.1899
20	3.264	4.02207	7.9023	3.72486	8.29144
20	2.56	22.2282	31.2857	21.6139	11.7097
20	34.3	9.79667	9.38943	10.2427	15.919
20	2.34	15.504	25.9984	30.3994	18.665
20	0.546	17.0176	20.7199	9.13519	12.2407
20	0.252	5.97695	7.1535	3.85126	8.28339
20	2.16	4.7652	6.41085	2.83811	5.09633
20	0.288	4.6068	3.29099	1.94063	4.20418
20	5.94	13.0041	20.2332	15.481	20.0054
20	2.7	8.94734	11.2618	8.30845	16.5986
20	24.75	17.3524	20.2575	20.6815	10.8994
20	1.7	7.96461	9.06022	26.4831	10.2979
20	7.14	6.51964	10.624	9.47087	10.0204
20	36.75	12.3628	8.75874	14.1294	14.8383
20	70	15.3394	20.6121	16.4602	23.3945
20	16.8	17.3829	22.8884	24.0876	28.1428
20	43.75	12.4056	16.0666	21.9781	16.289
20	19.8	7.4952	7.61294	5.66932	5.78121
20	33.75	16.0764	19.0322	23.166	22.937
20	34.2	8.02576	10.7365	9.38285	10.4987
20	25.6	21.8996	39.7287	33.5316	22.77
20	45	4.92543	2.93795	1.23001	2.87467
20	76.8	12.6369	19.8211	29.292	29.003
20	11.2	12.9283	25.0075	15.0083	24.8367
20	21.6	23.0203	17.7079	15.6827	21.1607
20	6.552	7.62355	8.39412	5.50795	9.59327
20	11.25	42.2838	30.6719	37.9995	30.0574
20	24.48	7.14365	8.73954	4.51734	5.96722
20	37.296	12.2389	14.3436	16.3059	23.0364
20	15	13.8261	12.1122	17.9284	12.533
20	6.93	10.5021	33.0356	21.1519	17.2785
20	13.728	35.6109	37.5811	43.7814	26.9409
20	5.04	4.26584	4.47832	0.898944	4.24769
20	1.2	11.1856	10.9366	10.1624	8.00415
20	24.192	14.4981	22.8221	13.4223	17.8085
20	0.924	7.92256	5.40036	8.36966	5.10481
20	59.532	53.854	31.8525	37.2896	23.8135
20	11.718	29.6701	29.8772	32.2561	43.2045
20	6.3	22.8385	25.0233	18.1165	28.1634
20	2.184	24.8777	49.0875	32.5319	50.8754
20	1.485	4.53944	11.87	6.22046	12.9593
20	41.58	6.28595	22.8143	8.48639	15.4947
20	3.808	16.3246	22.426	12.1946	20.5358
20	6.48	10.0005	21.358	12.2144	19.1149
20	6.9	13.9519	31.9706	13.8417	29.2066
20	9.2	27.3157	20.4116	34.3374	20.8735
20	4.5	26.3058	33.7467	26.1717	29.1124
20	9	7.47306	7.64427	7.49402	7.34556
20	45	17.7949	27.1779	54.7824	24.9068
20	4.875	5.45711	5.42663	3.2023	3.2375
20	19.2	9.77756	11.9126	7.60562	8.75043
20	0.24	12.3032	33.4778	11.6864	13.5841
20	17.6	12.4394	16.5788	6.54098	34.3361
20	6	44.1621	47.5774	43.0321	34.6156
20	38.72	14.6208	21.6995	17.2101	19.1259
20	24.75	11.7342	16.5705	12.0426	13.5959
20	8.4	14.7835	20.8433	18.3827	37.6539
20	7.038	8.67444	9.70556	9.33546	10.8446
20	2.142	5.51429	10.2609	4.02528	10.7711
20	2.652	9.07314	19.6342	10.1525	14.6056
20	4.725	17.4093	40.1285	32.104	51.8421
20	3	24.1719	32.1114	27.6682	27.8605
20	9.6	26.4994	26.9636	30.1344	22.0293
20	3.536	8.96039	19.2654	12.3264	16.3592
20	14.144	17.2762	22.3381	15.593	28.9315
21	59.15	21.5299	24.1901	14.0291	13.9058
21	16.016	25.1791	29.0493	49.709	41.6249
21	11.988	10.9619	10.9117	13.9998	18.1138
21	60	7.02833	9.96589	7.82907	5.52439
21	7.2	17.7254	22.6213	22.4756	25.8649
21	24.48	10.4132	12.4514	7.66013	10.597
21	2.145	4.05348	6.98208	5.15707	1.01362
21	10.12	14.6976	14.3166	12.5183	16.8032
21	36	10.1829	10.6171	13.615	24.7795
21	20	18.7188	28.6884	20.9845	39.4671
21	22.5	4.57314	7.11797	3.25266	5.0637
21	3.84	5.13516	7.66867	1.08641	3.8623
21	6.864	16.0801	29.1852	23.2808	23.545
21	21.924	16.63	18.7462	26.6555	22.1733
21	4.335	3.26606	5.22662	4.63474	4.39192
21	11.55	11.0393	12.2217	12.3528	13.3416
21	5.6	21.7209	20.6047	20.7877	26.8792
21	3.96	9.44973	18.0561	10.9615	17.0363
21	0.616	3.60456	4.57244	1.68972	2.19151
21	17.34	8.02239	12.394	9.77301	13.0577
21	0.336	3.84238	6.42855	2.038	1.20226
21	27	3.91423	4.98918	3.88042	1.42142
21	2.16	3.62196	5.87698	4.77492	2.88557
21	0.288	3.13691	4.43288	2.556	4.22135
21	1.848	4.69552	9.14477	6.08528	4.76661
21	4.725	2.96608	6.81052	3.1822	2.80318
21	11.25	9.00742	17.5513	13.1604	20.7077
21	15	11.3826	14.1187	9.32835	7.20047
21	40	6.31443	9.62302	14.5251	17.5902
21	16.128	18.7677	18.7893	21.2709	19.6486
21	8	7.45112	14.1353	17.3485	10.6826
21	2.85	6.54517	9.87658	5.06586	3.18167
21	6.375	13.5841	11.6088	8.36414	16.4828
21	160	20.855	37.2972	35.6353	24.9119
21	6.552	7.51575	8.45219	4.16795	6.51843
21	3.375	7.16854	16.3543	8.86826	7.26286
21	31.2	14.2319	18.0331	18.5479	9.87919
21	4.05	7.11249	11.8076	6.49657	7.19759
21	11.25	25.8532	23.0232	43.8859	41.6726
21	5.67	11.9431	13.9156	6.89816	8.4193
21	57.46	13.7008	17.524	19.7901	19.3692
21	14.04	16.2534	20.5255	5.98094	2.28269
21	15	12.6941	11.7817	19.5833	14.5688
21	269.568	31.3772	32.0085	55.7172	67.0921
21	13.728	26.2658	23.92	36.9593	25.873
21	19.04	6.78207	8.13868	9.46187	9.89138
21	1.56	11.3918	13.5394	9.81428	11.5133
21	12.844	23.32	24.768	18.2875	18.4733
21	56.25	15.8138	21.8426	16.4564	19.858
21	1.26	4.52728	4.95253	1.56477	0.651036
21	45.92	11.8312	20.789	15.5681	14.5145
21	5.04	5.05641	7.85541	3.95584	0.680468
21	4.56	16.2435	9.79075	16.6796	19.9032
21	4.488	20.891	14.2605	11.2451	18.8248
21	4.224	12.6983	11.062	3.62504	4.62913
21	6.3	12.8804	14.344	10.4123	12.0396
21	1.485	4.92661	10.0523	4.56022	4.53422
21	15.75	22.1606	20.1086	19.6595	24.1785
21	31.5	9.06351	19.2381	12.5896	12.3871
21	76.755	18.7411	30.6097	22.4587	29.2005
21	32.4	25.8834	36.9396	27.9321	49.4734
21	11.25	10.142	19.6268	15.1778	10.0909
21	4.875	5.9355	4.4398	2.40394	1.48364
21	82.5	6.35248	7.28375	7.61625	7.45214
21	6.75	10.0768	10.3792	11.8792	8.81953
21	21	5.52508	45.3758	4.23578	0.975954
21	7.59	12.4054	16.7634	8.19034	5.63425
21	7.038	7.41435	9.92689	11.5273	10.1294
21	49.5	27.2045	22.3027	38.6215	40.4047
21	36.48	7.41654	8.10514	3.88402	2.00183
21	6.75	4.9758	6.32653	1.57123	5.12598
21	2.142	6.37024	9.05138	2.9989	2.82752
21	4.186	19.71	16.8882	8.98471	12.3308
21	2.652	7.44613	14.2591	6.55092	4.01598
21	0.91	4.23367	7.33552	3.41785	2.10835
21	256	20.2105	31.4765	26.413	38.1447
21	10.8	7.72184	12.7394	14.2694	15.3135
21	24.64	18.0947	19.3687	13.7136	15.1863
21	14.56	9.89028	25.6808	19.3732	15.0405
21	16.5	11.1738	16.5561	16.2607	11.7139
22	59.15	20.675	32.9274	11.6643	17.5092
22	8.84	7.72821	5.49997	7.27054	10.2804
22	31.5	10.0179	14.8831	9.95551	8.6497
22	7.5	18.0338	14.7107	34.2621	18.1272
22	11.988	8.11259	16.0386	8.3813	11.5736
22	1.078	4.75541	5.41817	1.49119	4.98794
22	48.125	13.7848	33.7354	33.9477	3.35683
22	52.5	13.4742	16.48	16.4622	10.922
22	24.3	9.69793	22.1578	20.0185	29.6424
22	16.5	12.5158	18.0418	27.7615	14.1632
22	0.125	10.5233	22.1421	15.3436	31.4206
22	0.027	10.5811	7.06166	11.1718	13.6864
22	3.375	8.41922	6.20004	9.16052	7.01631
22	1.5	8.50103	9.11923	6.24383	10.0772
22	3	10.7491	8.8864	8.08225	11.0387
22	3.84	6.51014	4.98959	0.991441	14.9467
22	5.1	21.7146	24.4646	22.6603	30.8661
22	148.5	55.636	53.5106	129.794	33.1434
22	3.96	10.3035	9.94578	8.34237	24.7388
22	4.05	11.4204	10.8154	25.7982	16.1048
22	10	13.1023	13.8967	21.8663	16.7553
22	6.804	12.0575	23.7633	12.3543	24.3801
22	0.06	2.81659	3.06007	1.77789	3.67853
22	3.536	6.8967	5.44337	3.31506	5.4354
22	2.64	5.58423	4.07314	6.33587	16.3435
22	4.725	3.64601	2.89727	1.93264	6.5888
22	1.683	5.61393	8.75632	11.8036	7.32583
22	67.5	10.1728	22.2235	24.8061	18.0251
22	1.7	6.64927	15.6654	12.6155	12.9129
22	70	14.2468	24.2895	8.10843	31.5212
22	52.5	13.9408	21.1563	22.2629	20.6048
22	33	13.9311	12.4822	16.5311	12.471
22	16.128	16.7034	39.8599	30.0426	41.2279
22	2.85	7.19628	5.83157	4.79316	2.43114
22	4.08	9.90443	16.5496	39.588	11.9829
22	18.9	6.17261	3.9824	5.27975	10.2945
22	76.8	14.0027	33.4506	45.7568	27.0338
22	20.16	14.7798	7.89458	9.88601	13.3631
22	4.95	11.882	2.80693	1.22185	6.41468
22	1.1	8.44749	5.31117	4.20314	2.88985
22	37.296	12.6733	15.0412	20.5508	25.5584
22	10.35	11.4623	9.21534	5.64185	8.126
22	269.568	28.8542	61.9796	99.937	83.8538
22	6.44	12.7496	9.31265	7.06475	4.19462
22	4.56	12.4921	9.24571	7.62486	12.4572
22	3.96	24.201	45.3006	83.4379	45.5395
22	11.4	11.255	5.9489	3.90042	2.63147
22	11.718	21.1752	48.2317	30.9939	45.7108
22	4.488	15.9375	7.29876	15.6902	14.4967
22	59.94	25.8381	42.419	9.9301	28.2264
22	6.3	15.5137	13.1752	11.8047	21.8848
22	21.384	9.9108	6.18567	4.47465	9.49675
22	6.656	14.2627	15.53	34.6095	34.1397
22	27.965	9.9316	8.93122	9.69293	10.7976
22	6.48	10.5673	9.07883	12.4528	15.7331
22	9.2	21.7108	26.0066	53.062	27.7635
22	0.234	14.8841	23.3913	21.2829	20.3442
22	22.5	9.13628	7.0236	4.60482	9.53211
22	3.6	16.2224	25.0044	16.9829	34.1029
22	39.75	9.03354	8.27928	1.7365	5.49711
22	9.375	9.63853	11.4227	2.80899	9.62641
22	82.5	7.41219	10.8458	8.55328	12.0374
22	5.85	10.1065	23.3895	21.1974	32.0141
22	27.84	13.3963	25.9562	5.68709	14.7075
22	48	4.28655	2.15246	0.796421	2.23979
22	97.5	19.4649	47.866	70.1786	25.2634
22	38.72	15.5195	11.6122	11.6437	21.1133
22	30.375	22.8049	39.9587	31.6166	61.6199
22	36	18.8675	27.3543	41.1535	17.4612
22	6.75	5.93547	0.924998	0.1405	3.34607
22	24.192	4.6475	2.1835	7.13705	2.58519
22	0.729	5.29396	0.402177	0.261457	0.866372
22	1.5	6.97954	6.15135	5.47528	7.12679
22	11.25	10.7608	9.79897	24.8335	5.90423
22	10.8	9.75402	16.8715	20.4571	20.0503
22	2.925	7.88981	14.2973	19.3013	17.2619
22	1.21	5.71922	9.76664	10.2209	8.68921
22	1.56	8.73053	9.84613	13.6811	8.18622
22	45	19.5652	24.0838	40.6239	30.9873
22	16.5	9.12649	23.7698	16.9533	21.7081
23	151.05	23.5897	33.276	23.4621	24.7826
23	11.988	12.0034	9.27294	13.9396	18.5448
23	60	6.89232	10.8706	7.4863	5.71634
23	24.48	11.1187	13.3561	15.3348	5.7519
23	16.5	12.765	11.5861	11.9289	10.9043
23	0.125	11.3657	10.5632	6.81137	16.3085
23	3.375	8.62986	15.8846	3.28115	5.30715
23	0.027	11.0963	20.1001	20.2801	17.4493
23	10.12	13.8155	15.3561	7.96077	17.6538
23	1.5	6.73659	5.86371	1.46623	4.16815
23	29.304	18.951	27.0307	27.5749	20.9732
23	148.5	55.4963	42.9071	57.8241	46.2355
23	11.55	11.0503	13.4636	10.5488	5.84626
23	90	22.8647	24.5793	7.46967	20.5156
23	5.508	12.725	22.6225	12.193	47.03
23	2.25	16.5214	16.9011	20.4846	11.7201
23	4.356	13.4343	18.853	10.9859	6.97004
23	23.4	14.6555	17.2737	17.4103	16.0672
23	0.336	4.03087	6.15753	0.306999	0.486308
23	0.64	9.37914	8.99984	11.2512	4.89446
23	1.1	3.28533	7.38038	0.429898	2.33925
23	8.379	5.20746	7.34221	8.16951	7.89933
23	1.352	2.72418	9.54745	1.12714	3.01493
23	2.16	7.17444	14.1763	1.84518	10.6997
23	5.94	10.8986	18.5257	8.41873	8.59278
23	1	5.1764	11.9586	2.07477	12.9516
23	0.36	8.51516	4.42155	3.5328	0.954107
23	4.725	3.81127	8.1901	1.526	8.03297
23	1.35	11.7569	29.7018	8.42171	0.858552
23	67.5	12.7492	25.9713	8.87619	27.6465
23	7.14	6.3094	11.0712	3.95793	4.13107
23	15	13.9108	15.9054	4.56493	12.0383
23	2.535	13.6256	16.1428	18.8095	11.0098
23	52.5	14.6301	21.211	30.7529	21.9461
23	96.25	16.5822	24.4865	59.9106	29.1085
23	16.8	17.5736	18.4589	8.6203	25.1681
23	19.8	7.60064	8.26617	8.04332	10.791
23	160	23.8932	46.0323	32.8598	41.2335
23	54	9.42869	14.8224	6.14177	12.4437
23	3	12.9118	27.2174	16.3239	10.2298
23	34.2	9.72101	11.7733	18.0611	10.6659
23	4.004	8.64128	8.52017	6.13757	5.81495
23	5.5	22.2197	23.044	10.4307	27.4772
23	6.552	9.88087	7.85478	3.42387	7.33595
23	4.95	11.9196	16.1967	2.45393	8.46002
23	3.375	8.34637	19.0127	5.72872	5.9436
23	16.32	11.4063	19.5871	5.92051	12.8901
23	4.05	7.8198	14.3108	9.78864	21.9156
23	240	21.1789	42.79	33.8106	31.0258
23	1.573	12.2339	15.9323	16.3595	17.9914
23	0.704	12.3916	23.3795	5.17858	11.3393
23	37.296	13.6351	15.5735	11.802	29.8471
23	14.04	12.3286	21.0884	2.27187	4.01789
23	15	13.8405	9.30724	30.4521	14.4383
23	6.93	10.7979	28.6364	11.9339	6.66771
23	3.36	9.67451	12.3232	0.878394	5.40732
23	10.35	15.9177	13.1498	2.92204	11.1225
23	4.914	5.45112	11.9622	2.26959	17.1121
23	5.04	6.00596	9.73086	1.56002	2.52668
23	1.2	11.3363	11.9594	12.7533	6.17556
23	0.48	6.43685	11.0582	3.12054	6.13396
23	3.96	24.3081	32.9814	55.181	55.7295
23	11.4	13.4983	11.6683	1.65348	2.38996
23	59.94	23.785	24.8897	15.2253	19.3238
23	6.3	13.0517	20.1381	5.08736	17.9717
23	1.485	5.11811	12.7201	3.61988	4.49303
23	15.75	21.8897	26.2372	17.0775	28.7684
23	41.58	8.2642	20.376	5.43346	9.5659
23	0.12	10.7904	10.3739	7.52083	3.8333
23	9	8.52101	8.02817	11.5942	5.30256
23	18.75	12.9299	23.3225	3.95681	9.85706
23	18	8.3312	13.9683	8.50601	7.65911
23	10	10.2083	11.9273	4.12468	5.41663
23	24.75	13.9651	19.0531	20.0178	6.54597
23	30.375	21.8863	33.8211	37.6838	33.2108
23	36	16.6203	12.3514	30.5934	31.2577
23	6.75	5.75401	6.40127	0.435989	2.91063
23	4.725	17.0565	36.2308	20.686	32.7365
23	18.9	10.9598	19.5392	11.8902	11.863
23	1.21	6.35445	11.3137	11.8439	8.7253
24	59.15	18.7832	23.1035	16.213	16.6077
24	60	7.466	11.2883	9.30476	7.92117
24	0.45	6.82823	5.8864	3.83841	12.5225
24	52.5	13.1333	11.149	5.20743	9.71339
24	47.25	14.0782	16.3308	17.8635	19.7726
24	0.81	11.9733	15.2251	13.4559	6.76223
24	3.375	9.61805	23.3623	24.242	9.79176
24	36	10.2757	10.5723	16.0089	16.8827
24	24	10.0474	12.403	12.2607	19.1376
24	3.84	5.42423	8.74932	4.58954	11.5802
24	9.216	13.593	19.8716	23.2662	17.3783
24	4.05	14.601	29.3319	27.434	38.4963
24	0.216	5.70435	7.29661	7.27723	10.8024
24	17.34	8.18296	12.5104	18.6706	9.26504
24	12.65	4.68792	7.11644	9.01676	2.80183
24	9.66	11.4931	9.87445	10.9568	2.21394
24	0.64	8.60533	9.77527	10.2841	5.03173
24	5.616	5.08447	6.8054	4.50651	3.00317
24	5.94	13.5556	19.404	21.5217	11.1595
24	0.576	5.26635	10.2896	11.3837	13.459
24	3.536	5.84997	11.4882	8.82255	3.71047
24	0.528	8.29304	8.55978	5.73229	4.49466
24	1	7.69986	12.4278	14.0108	13.1134
24	16.2	10.5634	27.1608	28.0965	23.3235
24	0.462	10.5575	13.6319	17.8238	5.51263
24	24.75	17.6402	19.6391	18.853	19.8545
24	1.683	6.41338	15.0673	14.0287	6.91098
24	2.25	6.27127	11.54	8.98413	7.28844
24	2.535	18.3223	19.5239	17.3621	19.5409
24	40	7.15765	10.001	10.7006	16.5075
24	52.5	18.4049	26.5148	33.6446	40.0097
24	48	17.8107	19.8844	15.9666	21.6015
24	16.8	19.7644	23.5693	25.7429	30.2807
24	2.85	6.30059	10.3117	9.84823	3.53268
24	6.375	15.0259	14.6201	11.5326	22.4146
24	58.5	13.8553	14.7393	9.16815	13.9904
24	4.08	10.028	18.3106	22.6646	10.4687
24	33.75	15.1464	18.9261	27.8874	21.0201
24	23.625	7.44579	19.2587	16.453	10.4235
24	25.6	16.5196	32.9096	16.5962	10.745
24	4.004	8.72577	8.91942	13.7629	8.82526
24	1.232	4.83667	11.8241	10.7884	8.04197
24	3.375	8.56884	17.7666	14.0232	8.41247
24	1.44	8.72112	15.6011	13.7221	14.2502
24	240	21.5391	42.4589	46.246	28.7846
24	6.93	11.3655	26.4809	22.3518	10.4407
24	29.484	6.28799	12.9206	13.8834	8.48542
24	4.185	14.8685	17.4447	19.943	23.9248
24	1.26	3.77859	5.52744	5.82965	1.43557
24	6.44	13.906	8.58444	8.217	4.8469
24	45.92	11.8555	15.1185	8.1555	14.0738
24	1.2	11.5783	11.2918	5.98533	8.73186
24	1.17	6.93363	6.91703	3.85784	7.99754
24	0.924	4.97432	4.8824	6.09177	3.06697
24	3.96	25.8385	29.7852	27.5658	53.4806
24	5.984	11.651	15.4792	12.395	9.00648
24	4.224	13.8608	12.0234	19.9781	8.8659
24	21.384	9.72945	14.1191	12.5086	8.96567
24	2.184	27.0145	41.3219	28.2293	60.517
24	1.485	5.51114	13.6277	9.69444	6.09446
24	5.168	12.7161	18.3708	16.5513	15.6805
24	32.4	35.3086	37.4957	37.2263	46.1177
24	9.2	34.026	20.3121	24.5113	22.4402
24	4.5	20.4112	26.1108	31.1641	18.5329
24	9	6.98578	7.0217	8.89171	3.6984
24	18.75	11.7633	23.4145	20.5764	11.1671
24	17.6	13.2345	17.0769	11.5367	20.95
24	6	33.7545	38.7573	34.1424	34.6212
24	21	5.32284	47.3076	8.89446	1.68978
24	26.25	8.58403	14.7422	15.2528	12.06
24	31.5	5.98487	9.0462	12.6585	11.2107
24	36.48	7.39288	8.12973	8.82237	3.40102
24	0.816	5.52786	14.3512	11.4179	5.36513
24	4.725	16.6907	31.4105	28.6308	29.8767
24	12	15.9691	16.5997	19.883	17.5902
24	3	19.0121	28.2282	32.8826	31.5201
24	8.694	12.8218	13.6572	13.0611	6.88778
24	2.925	7.1426	13.6702	12.1571	13.4656
24	90	13.8125	16.5112	18.1575	24.3039
24	14.56	10.1211	32.9301	23.3208	13.3867
25	16.016	21.2202	20.102	37.4709	24.1083
25	7.5	16.7104	13.3529	22.2464	18.5358
25	22.5	3.57781	5.1814	2.85912	3.76731
25	0.81	10.8383	13.2116	5.20626	2.69736
25	0.125	10.9483	12.1927	13.5382	22.0037
25	3.465	5.81015	8.94392	4.18061	2.09642
25	0.027	10.5549	13.8731	10.4059	11.0161
25	1.5	8.07217	11.0426	8.33037	5.70438
25	1.5	5.8889	7.59903	8.06985	5.23863
25	21.924	18.4069	16.7126	26.8185	23.0098
25	29.304	17.9185	16.2247	25.0925	29.7733
25	5.508	15.2703	12.9899	21.8476	24.9524
25	3.36	40.5468	37.0913	45.513	73.367
25	3.96	11.1715	16.062	12.2794	13.0273
25	4.05	14.986	15.7668	26.4192	16.0184
25	10	10.348	13.5361	10.946	7.16125
25	1.8	10.4539	10.8644	7.0915	9.57335
25	4.5	9.57881	13.2438	7.75049	3.45686
25	27	4.30177	7.07352	3.33337	0.638632
25	12.65	4.18054	6.38736	2.62111	0.91828
25	1.5	5.7726	9.56424	5.32249	9.18703
25	0.64	7.80239	7.00802	5.67023	3.09928
25	0.06	2.50565	9.56402	2.05606	3.09667
25	3.5	7.71144	12.6601	6.39489	9.11483
25	38.5	11.825	15.4011	11.7275	8.97031
25	1.35	11.9846	36.972	10.9514	3.69659
25	1.683	6.8938	10.6232	9.84747	7.30753
25	31.35	14.0188	15.7228	18.9239	15.0513
25	15.84	11.738	9.77875	13.6854	5.41695
25	48	20.2759	23.547	37.4352	34.5155
25	90.24	15.3642	18.9127	18.8389	32.3881
25	6.375	15.1773	15.114	14.0594	22.3221
25	21.504	15.9137	22.57	22.0415	24.0767
25	18.9	8.91831	9.49843	7.38933	10.0555
25	18	13.4409	13.9076	23.9845	33.0126
25	7.65	17.759	18.3293	29.0335	22.4324
25	18.375	8.57781	13.2811	12.9025	14.1437
25	45	4.21752	5.65302	1.84282	5.73861
25	91.143	17.5216	18.4464	20.2783	10.469
25	20.25	8.9348	9.86469	12.1478	8.1491
25	1.44	13.3178	14.1973	20.006	20.54
25	4.8	8.75405	7.5377	11.6642	6.87636
25	16.32	12.8835	15.5188	10.0349	6.20634
25	24.48	9.07531	9.45085	7.19308	8.00374
25	5.67	12.1894	11.0381	7.33803	7.88816
25	0.704	13.3711	13.2244	9.78346	10.1239
25	97.02	21.0966	14.8729	11.3786	19.2487
25	269.568	25.5934	22.3334	59.0246	85.467
25	8.526	14.3747	15.0755	17.18	16.1981
25	13.728	28.812	21.3789	30.0873	19.1864
25	1.56	12.6835	12.1951	10.6308	16.1253
25	1.26	4.18121	6.80659	1.72985	0.62494
25	5.04	6.4862	7.82359	2.72517	2.49072
25	1.2	10.461	12.9511	8.8303	5.13504
25	12.42	11.1272	13.6993	9.21941	11.0977
25	26.04	18.435	18.0618	25.5176	29.0735
25	59.94	24.4202	26.8719	45.0247	48.8601
25	1.716	6.02213	8.30204	6.66607	4.41565
25	11.25	13.5083	17.2474	32.3244	28.969
25	1.44	16.8983	12.8537	22.1691	35.2971
25	45	18.0454	26.0306	44.0597	22.0499
25	59.4	13.7613	13.4316	6.3067	13.1164
25	4.875	5.54443	7.90552	2.38014	1.01595
25	9	7.29083	9.25546	5.08546	7.49646
25	19.2	13.2205	13.4025	4.53506	13.8657
25	17.6	10.8093	12.8153	7.0102	15.1088
25	97.5	19.7009	17.0915	34.4087	25.7405
25	21	5.54346	45.8596	10.4751	0.336586
25	11.88	14.253	13.1429	13.0495	20.707
25	6.75	6.65969	11.2224	2.44547	4.81495
25	1	6.22879	10.8911	3.48097	7.24125
25	1.785	9.00564	14.017	7.99363	7.63181
25	37.625	10.5655	13.35	11.8767	14.1775
25	0.91	4.63959	8.37613	2.94471	1.04688
25	10.8	8.44703	11.944	14.5913	15.5898
25	8	7.57466	12.495	9.01543	8.51525
25	1.8	6.7129	8.79075	1.60377	1.06603
25	3.536	8.26308	12.0394	8.98408	9.48712
[truncated: 6,002 more rows]
